# Supplementary material for: Discovery of 95 PTSD loci provides insight into genetic architecture and neurobiology of trauma and stress-related disorders
Source: bioRxiv or medRxiv preprint supplement (doi:10.1101/2023.08.31.23294915), 2023-09-02
Supplement: Supplementary file [file media-9.pdf]

## **Supplementary Data 2.**

Forest plots for each of the 81 index variants of the genome-wide significant loci identified in the GWAS meta-analysis of 137,136 PTSD cases and 1,085,746 controls of European ancestry. Each plot provides a visualization of the standardized effect size estimates for each cohort, represented as black squares that are proportional to sample size weight. Horizontal bars indicate 95% confidence intervals. Sample size weighted meta-analysis results for the data subsets (Freeze 2.5 [F2.5], Electronic Health Record [EHR] based data) and the complete Freeze 3 are represented by blue diamonds.

rs78201023 (Locus 1)

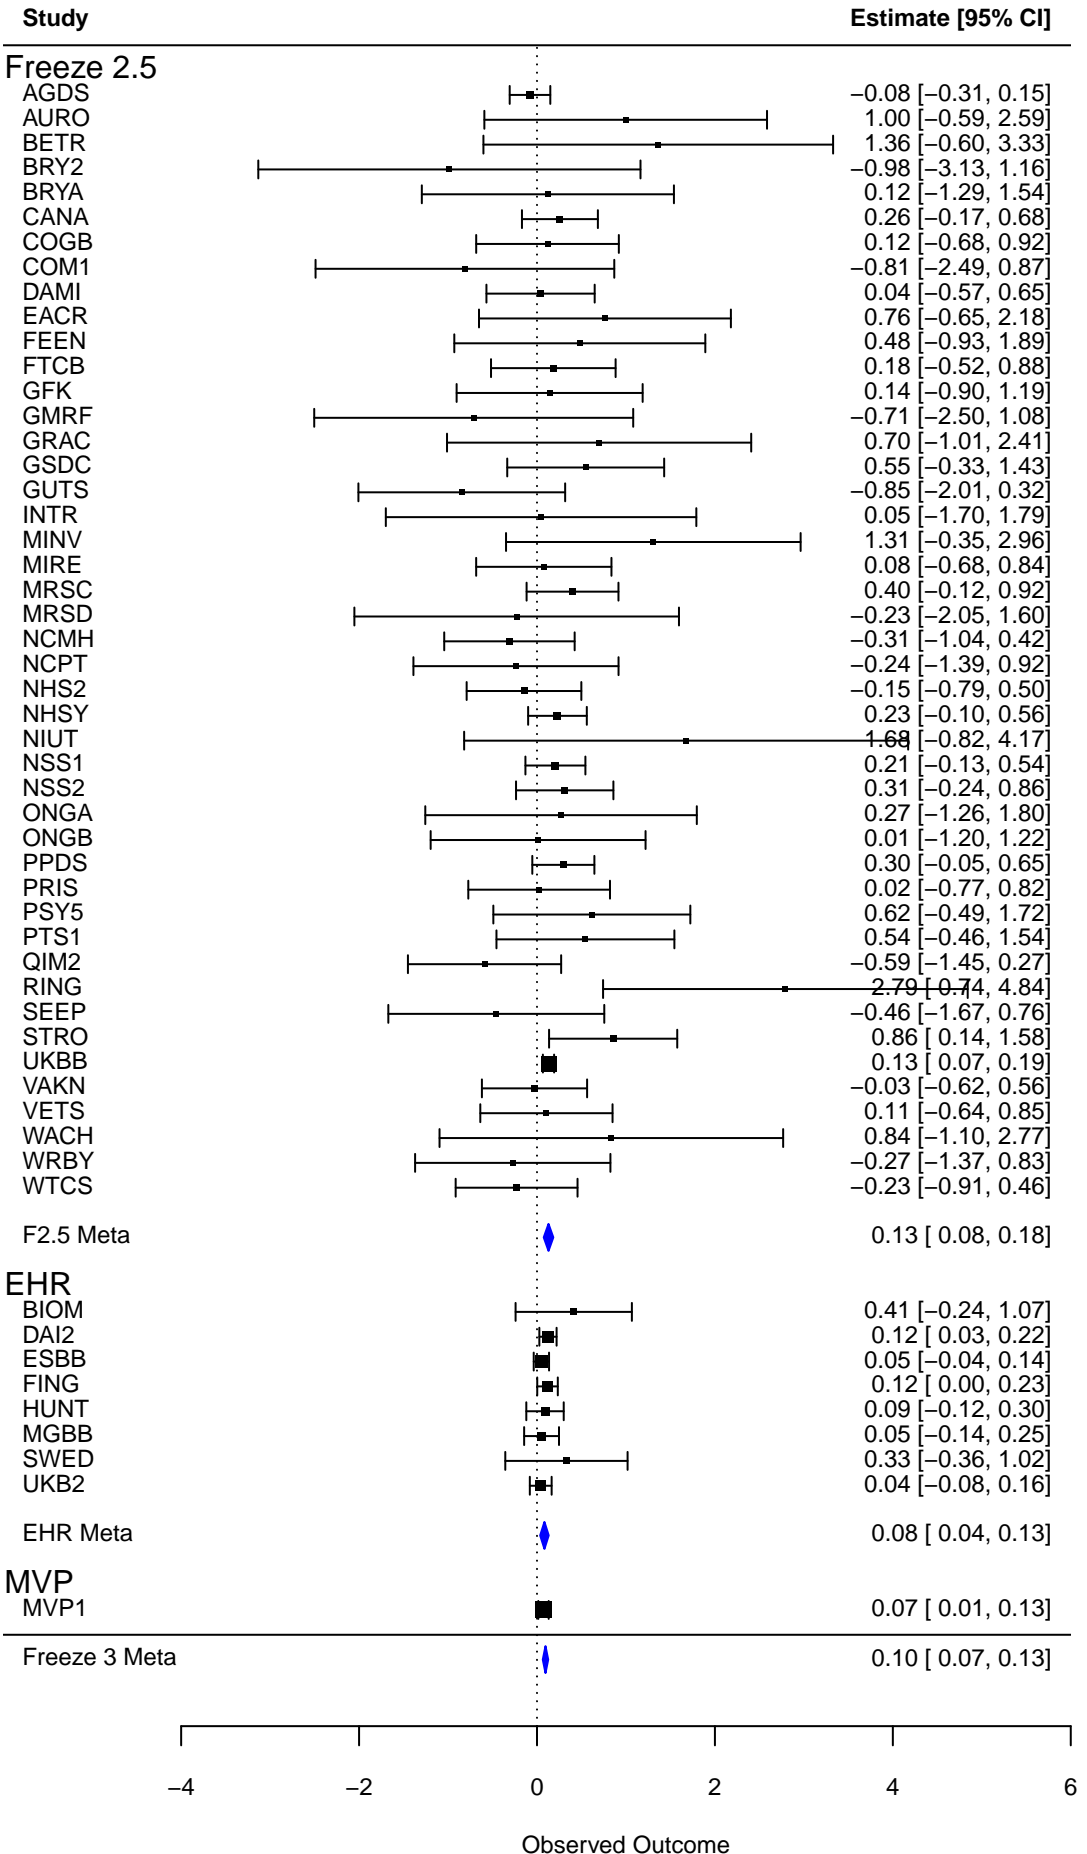

## rs12026766 (Locus 2)

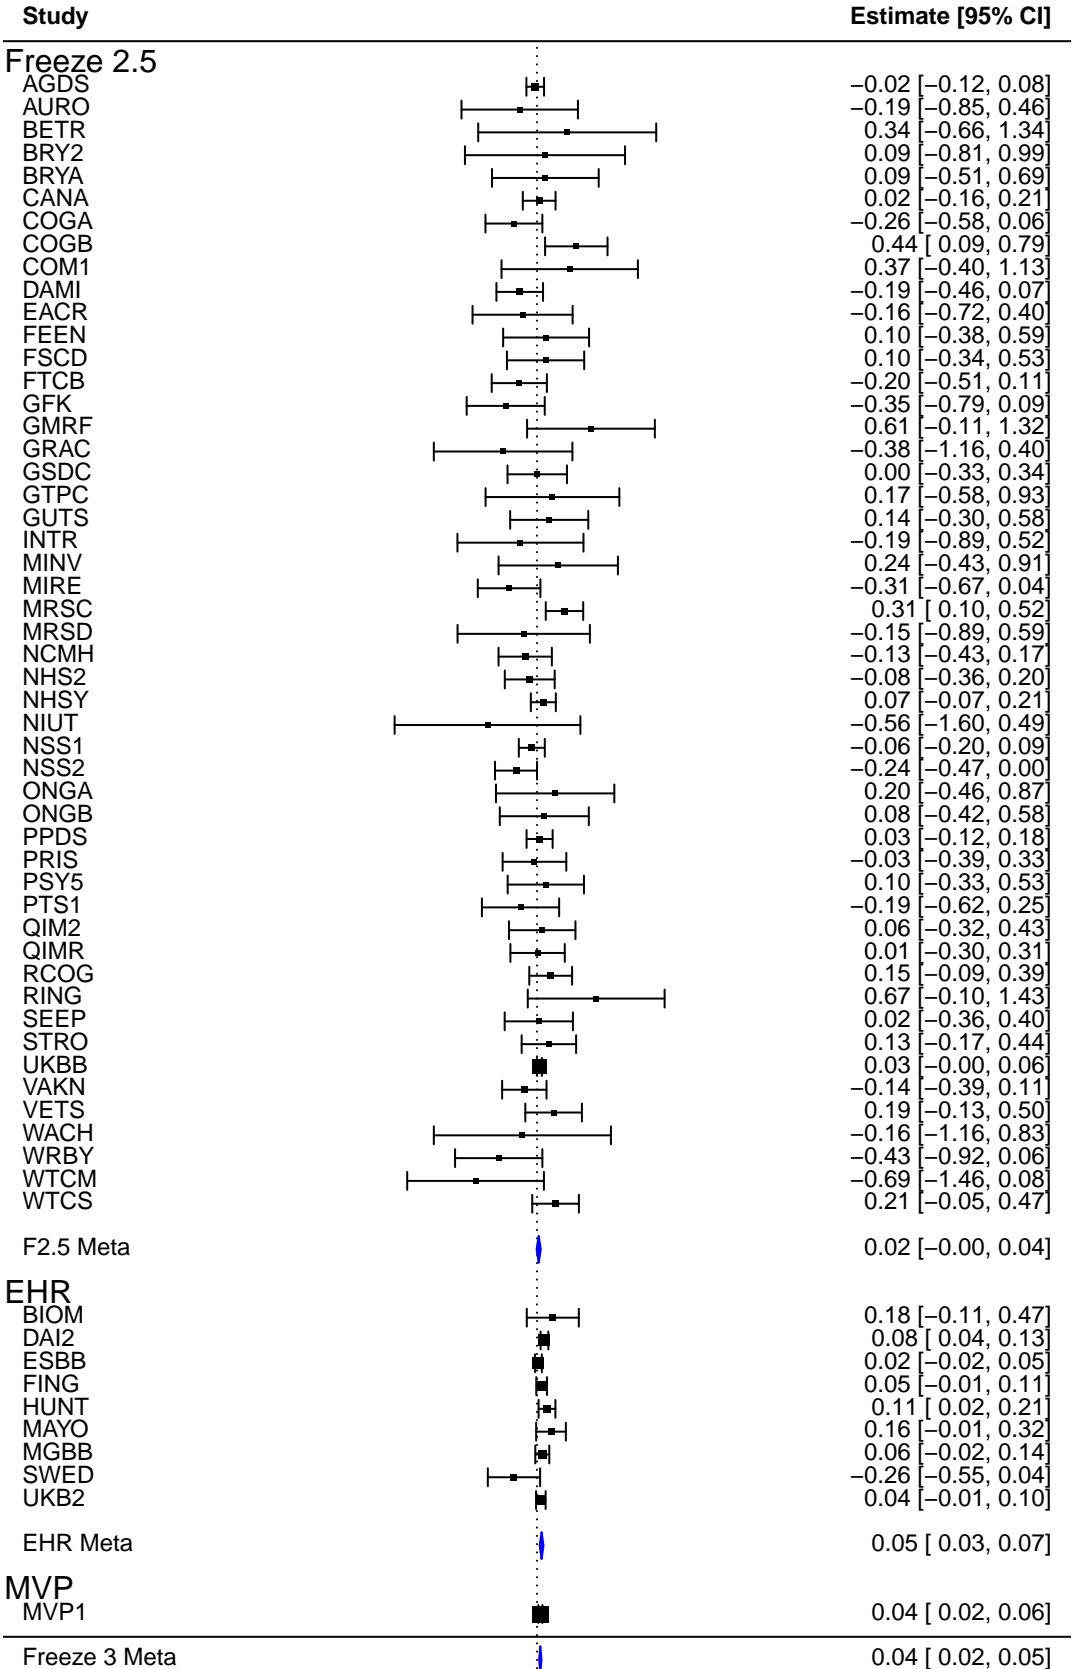

rs7519259 (Locus 3)

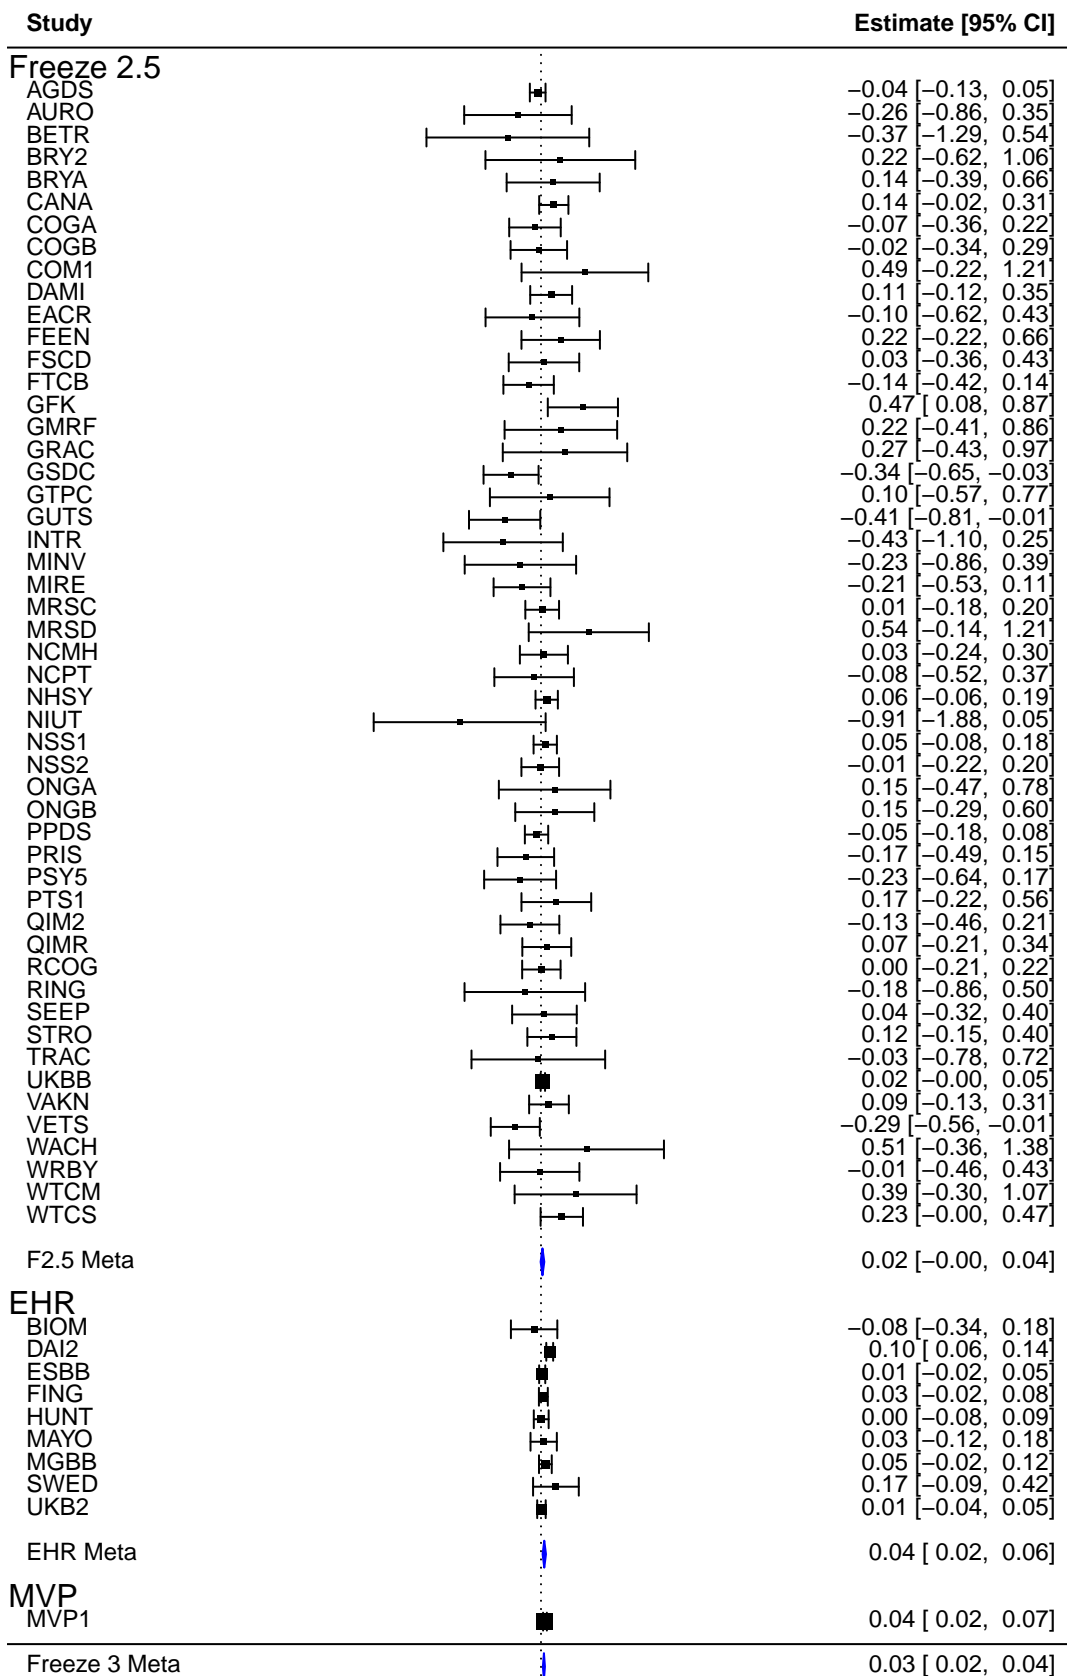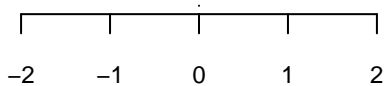

Observed Outcome

rs12128161 (Locus 4)

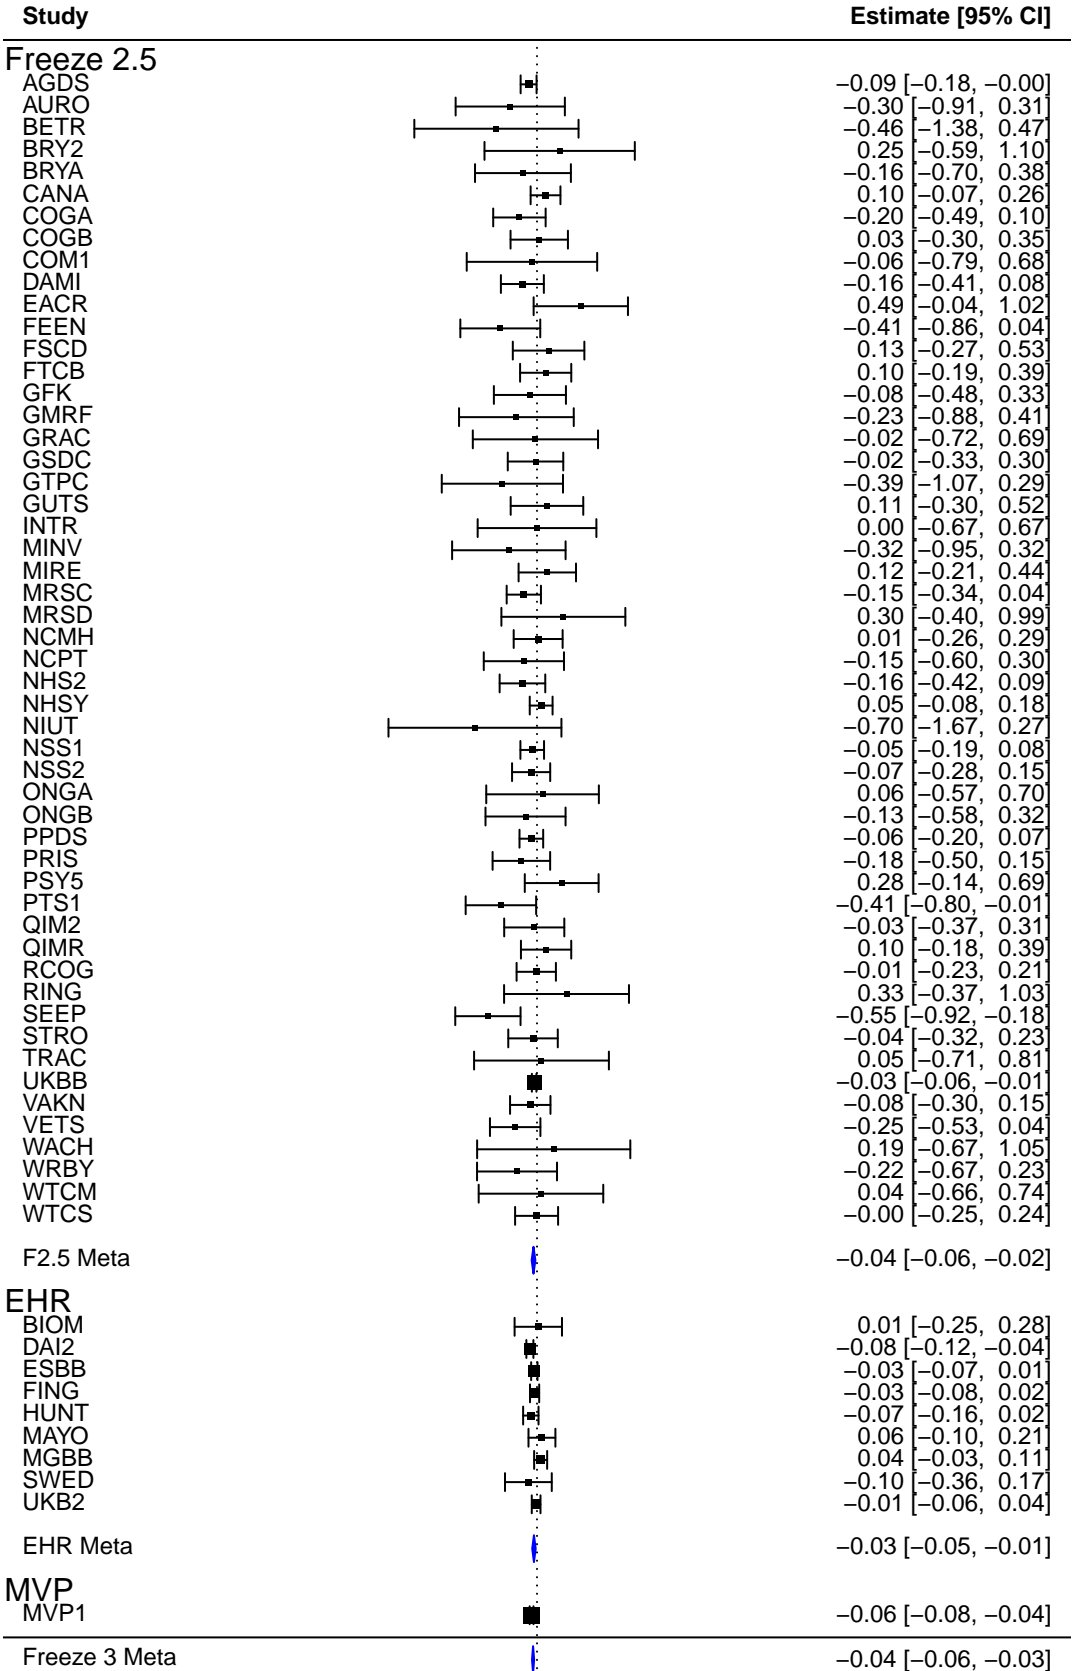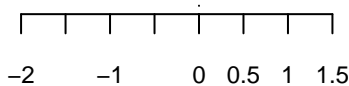

Observed Outcome

## rs4652676 (Locus 5)

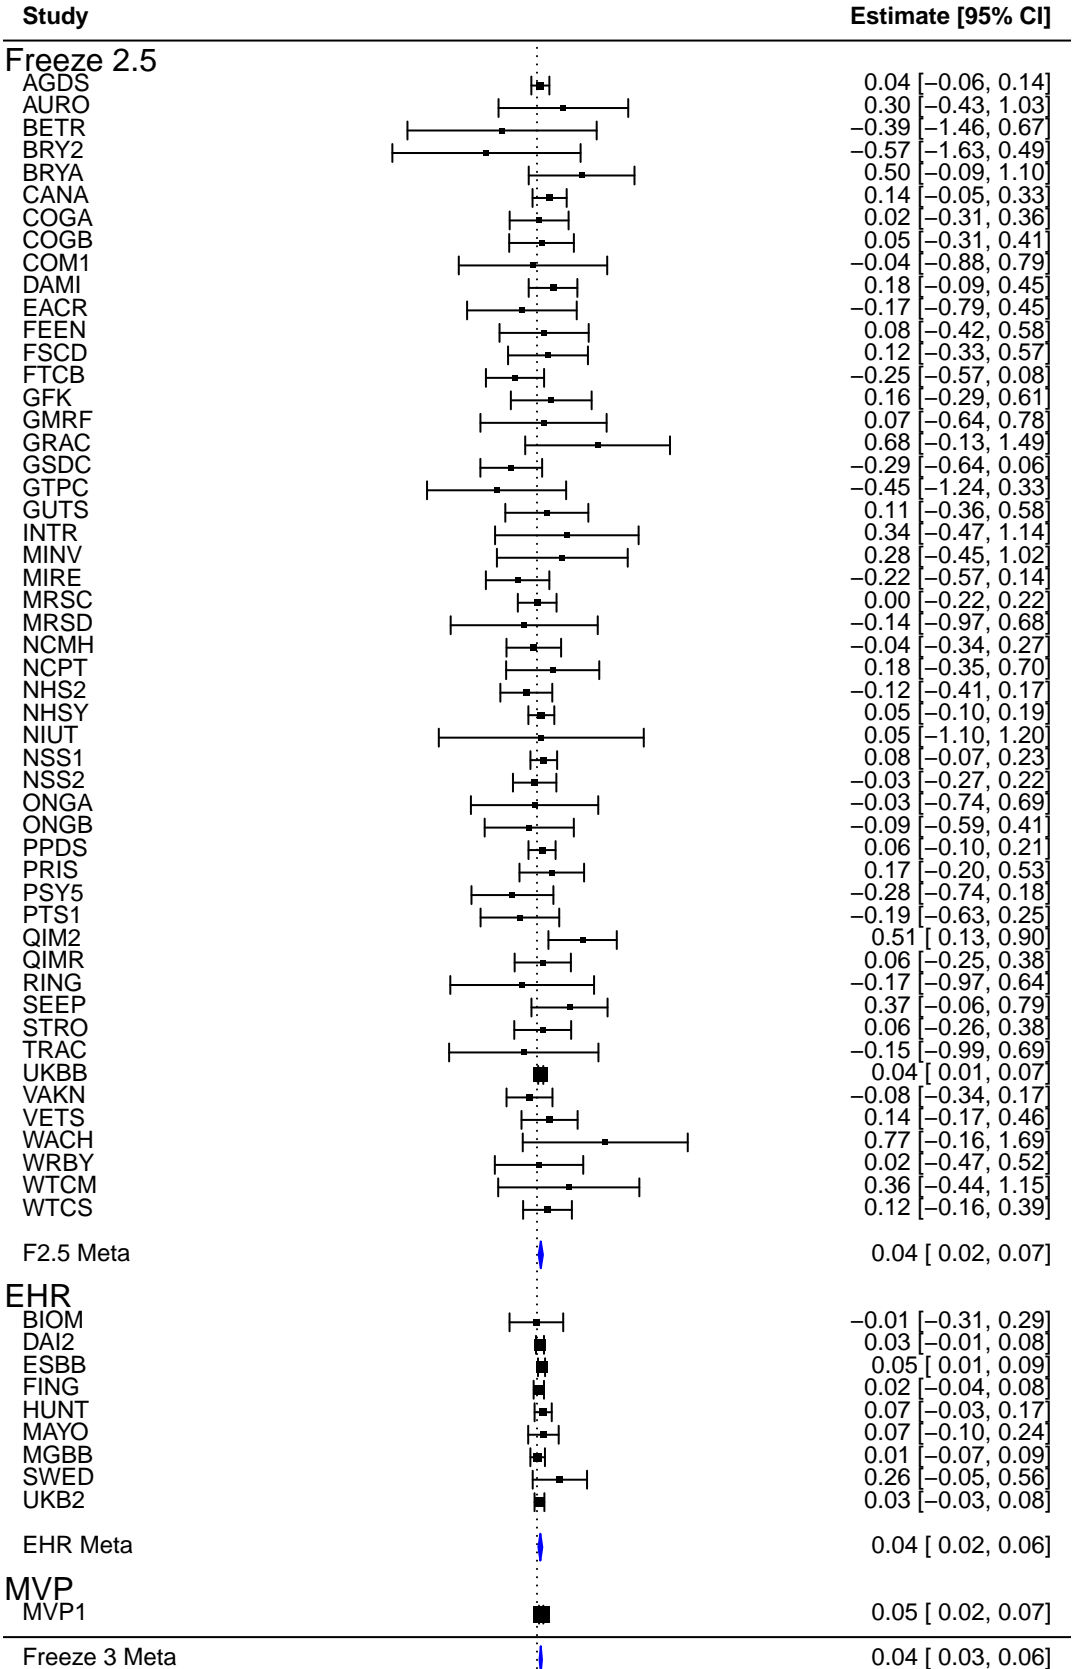

rs9651063 (Locus 6)

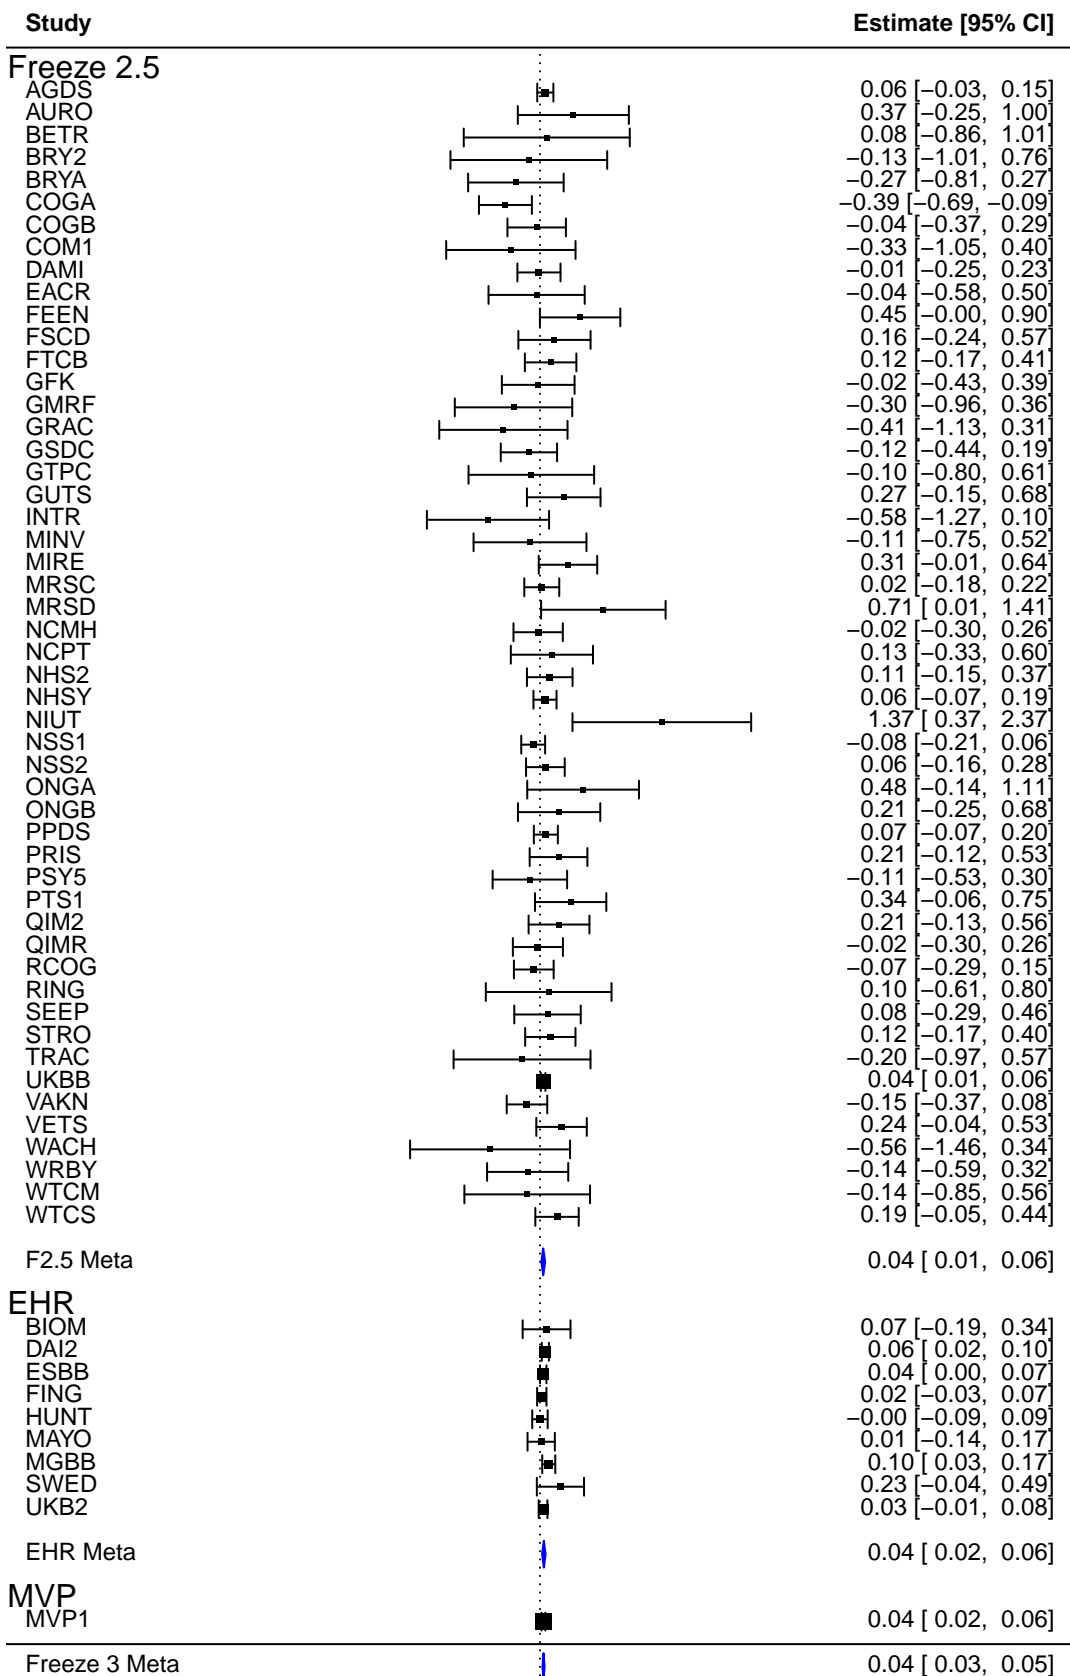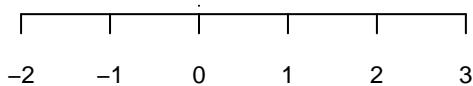

Observed Outcome

## rs2011374 (Locus 7)

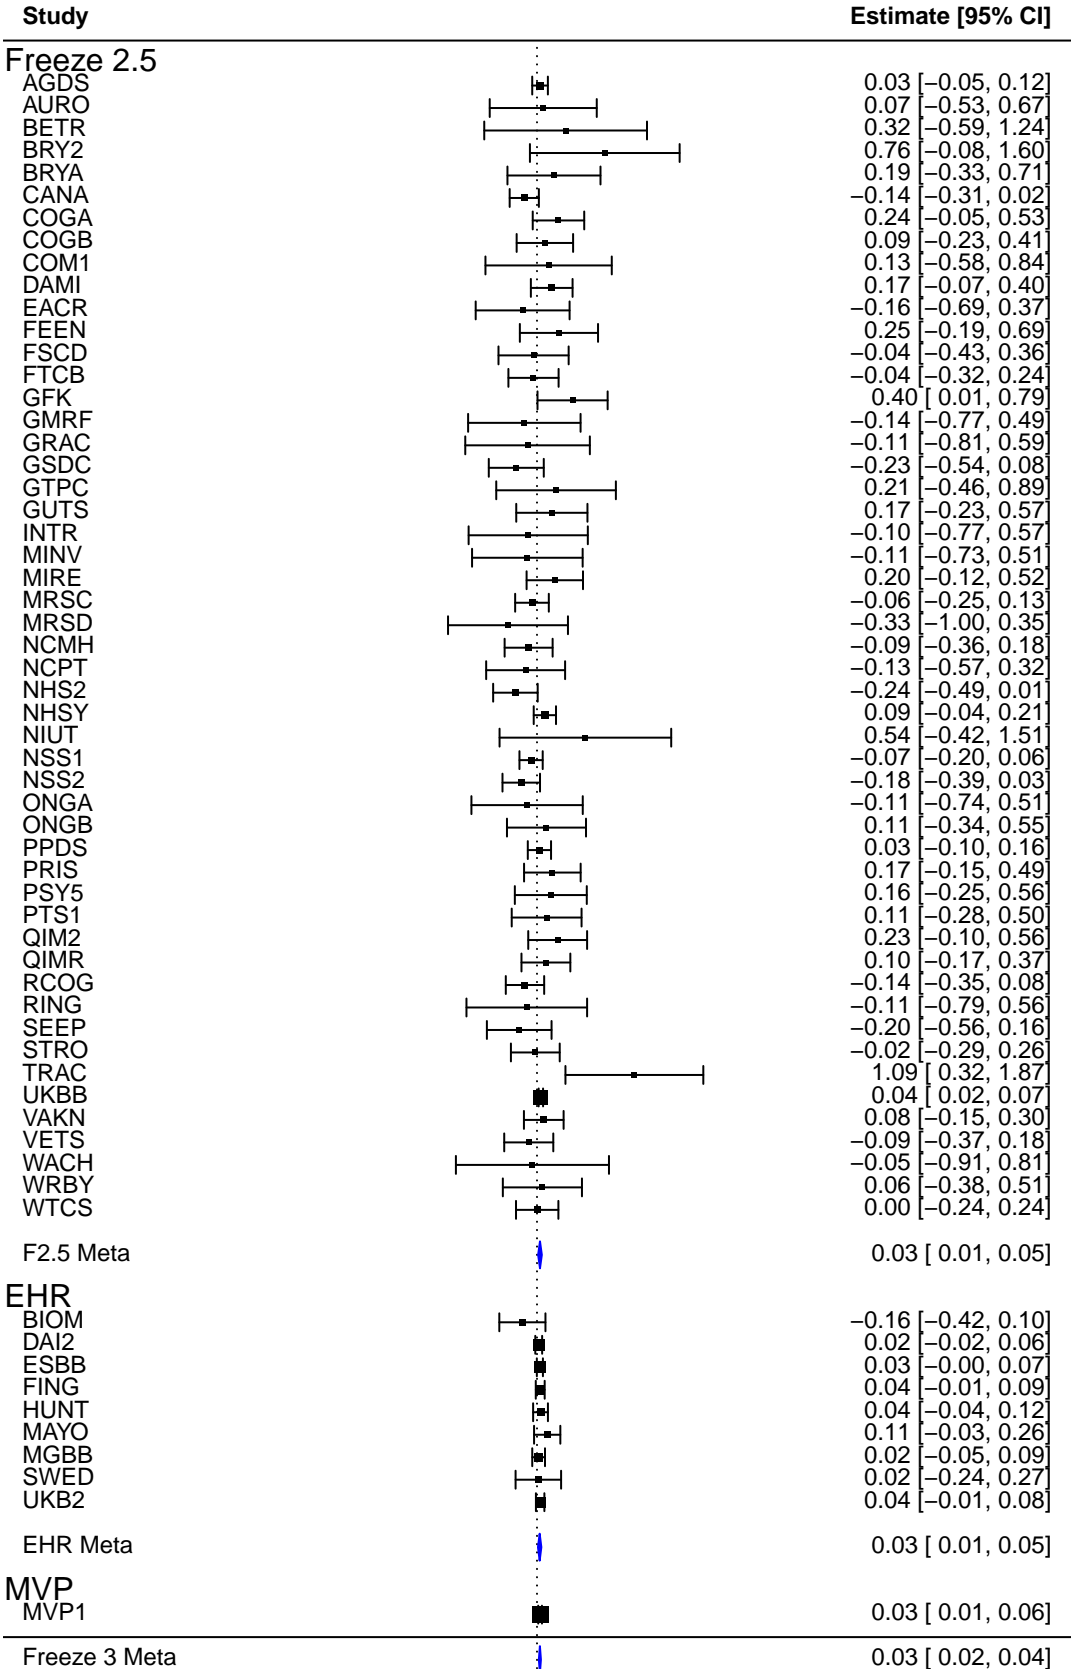



rs6759922 (Locus 8)

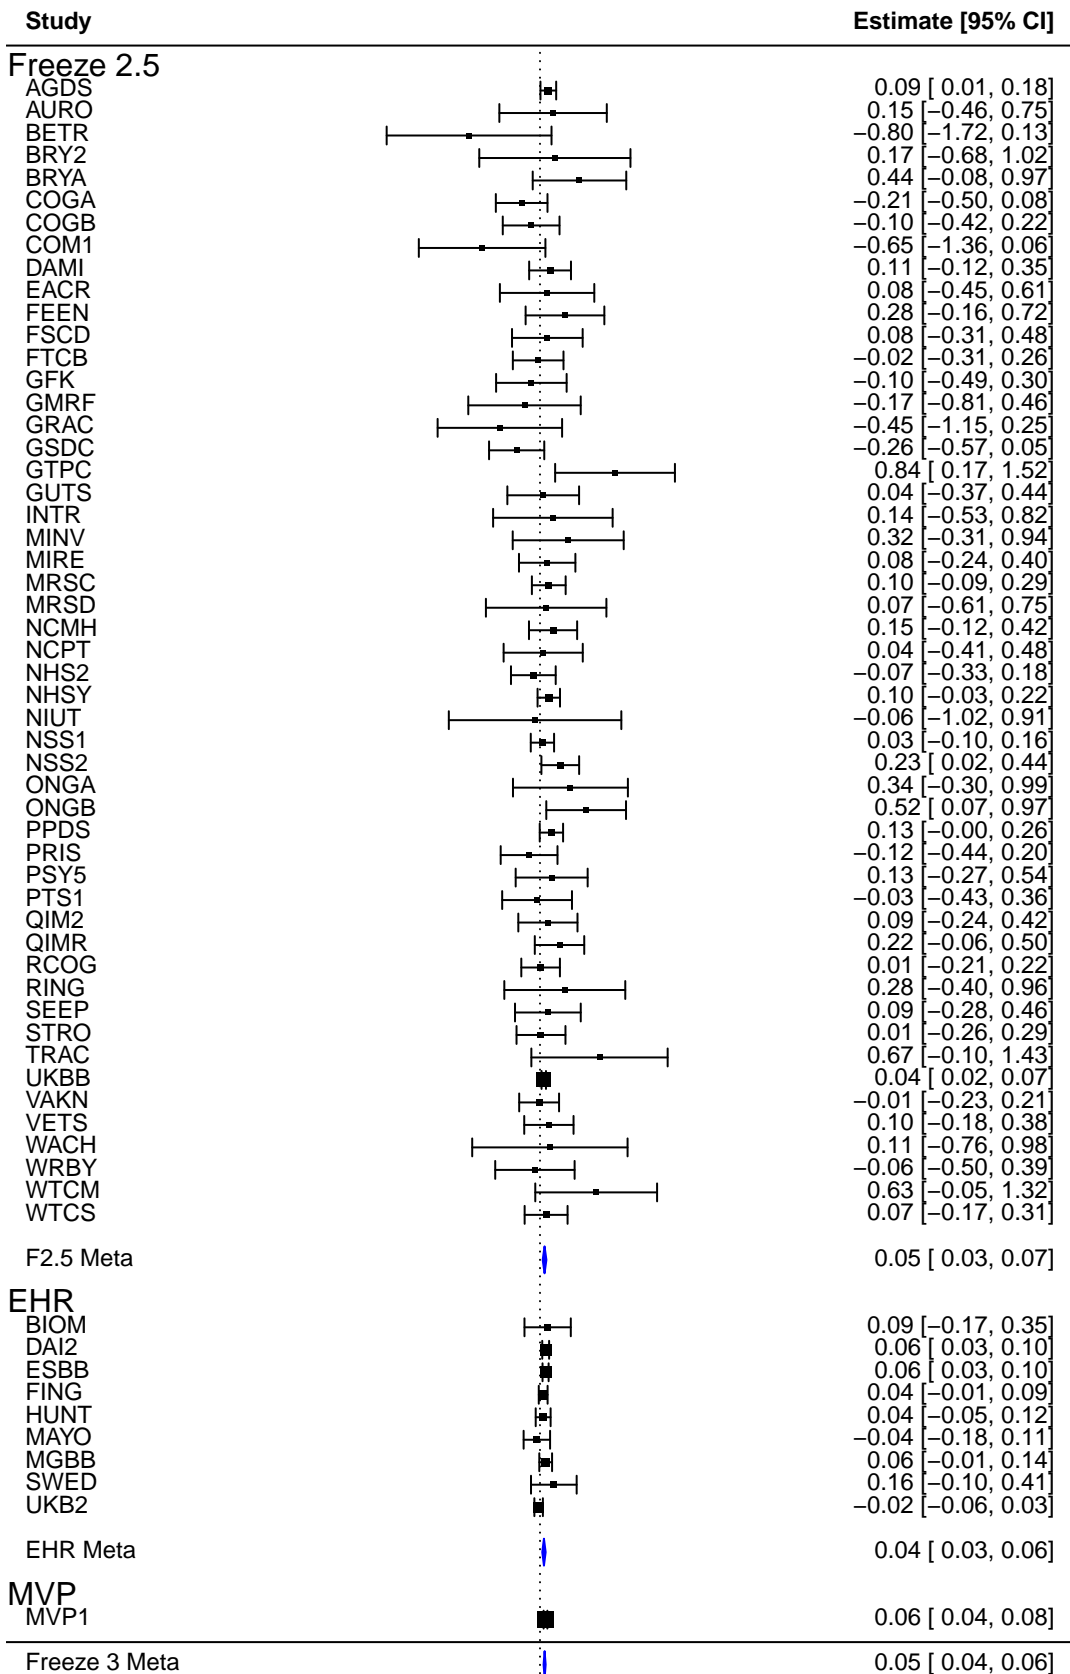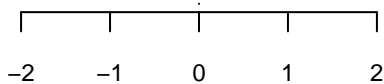

Observed Outcome

rs1866560 (Locus 9)

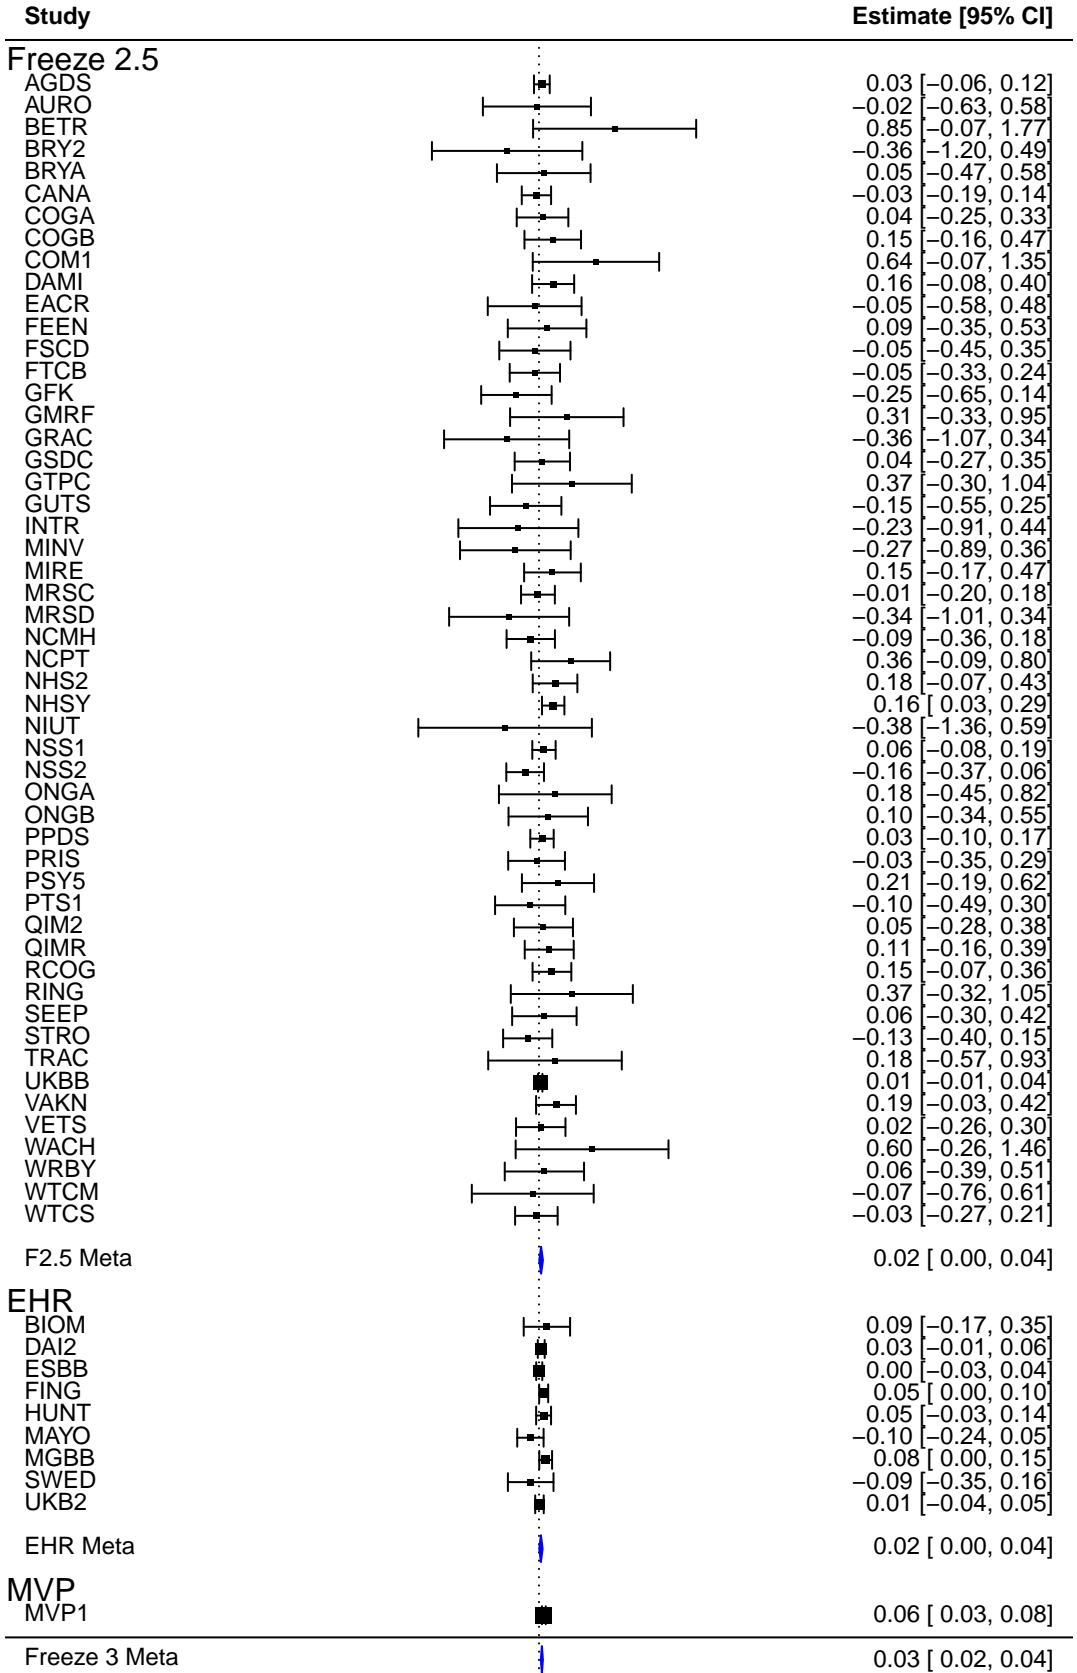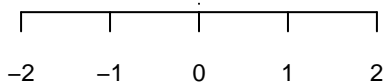

Observed Outcome

rs10496632 (Locus 10)

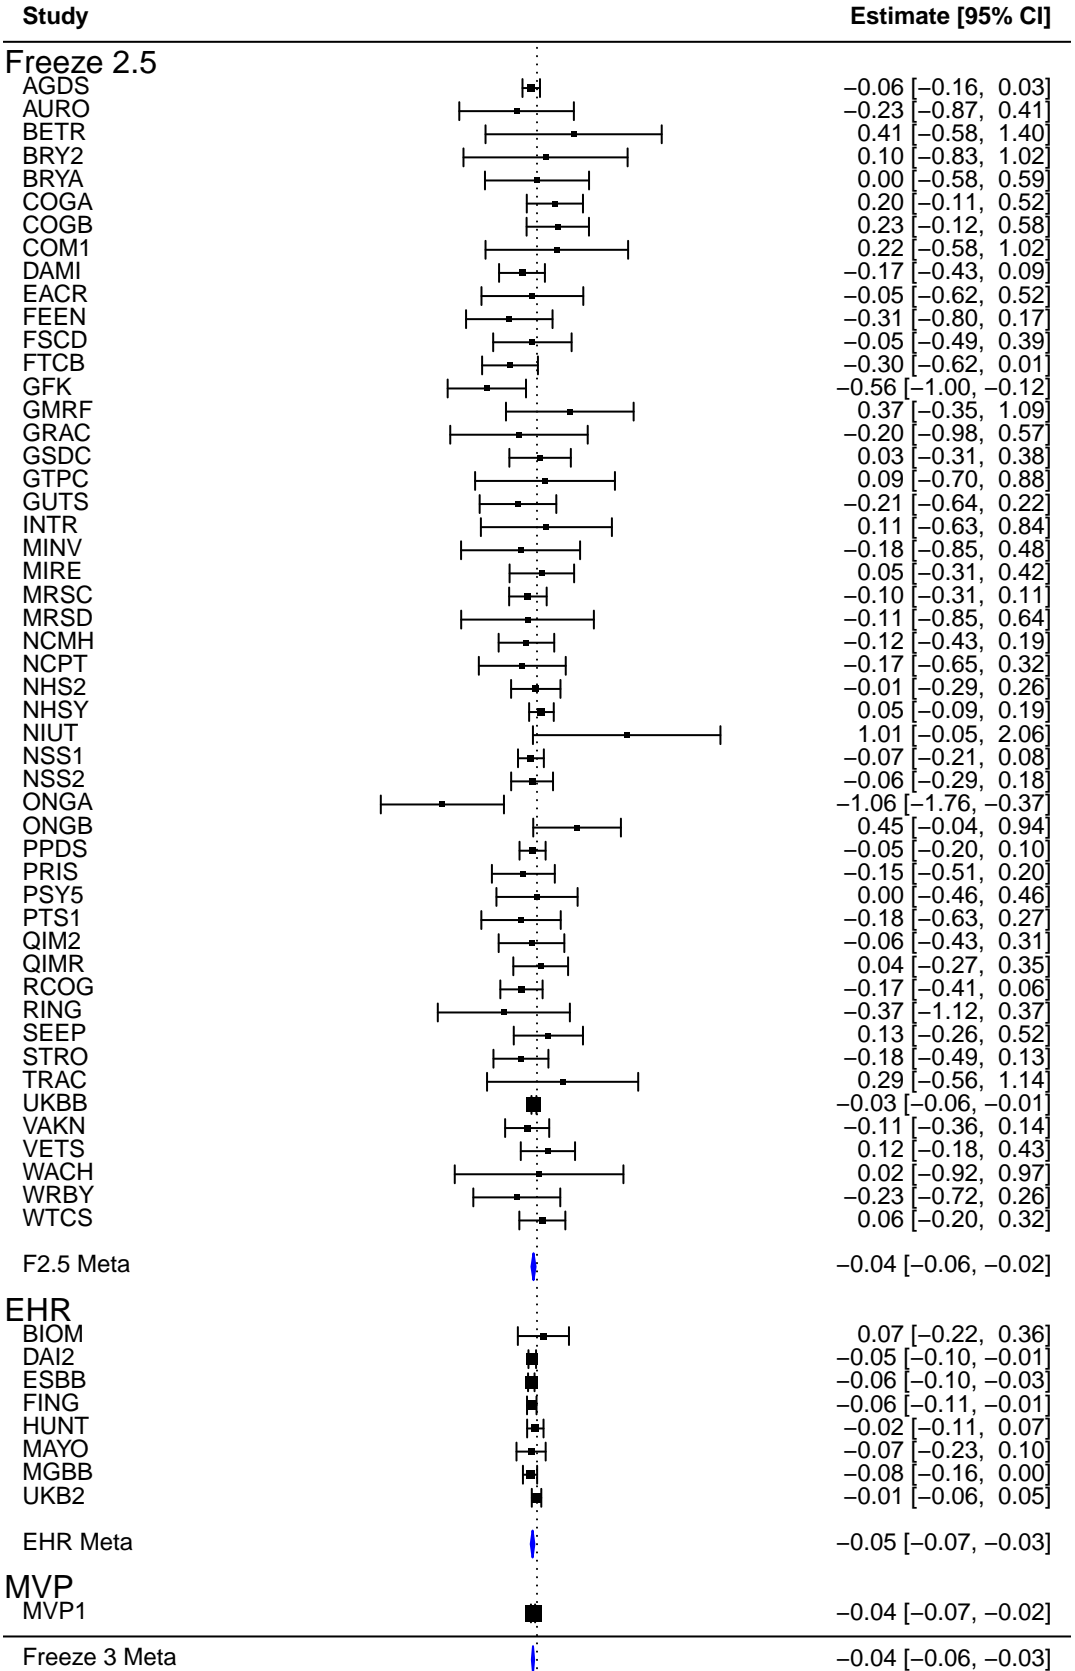

Observed Outcome

rs6430728 (Locus11)

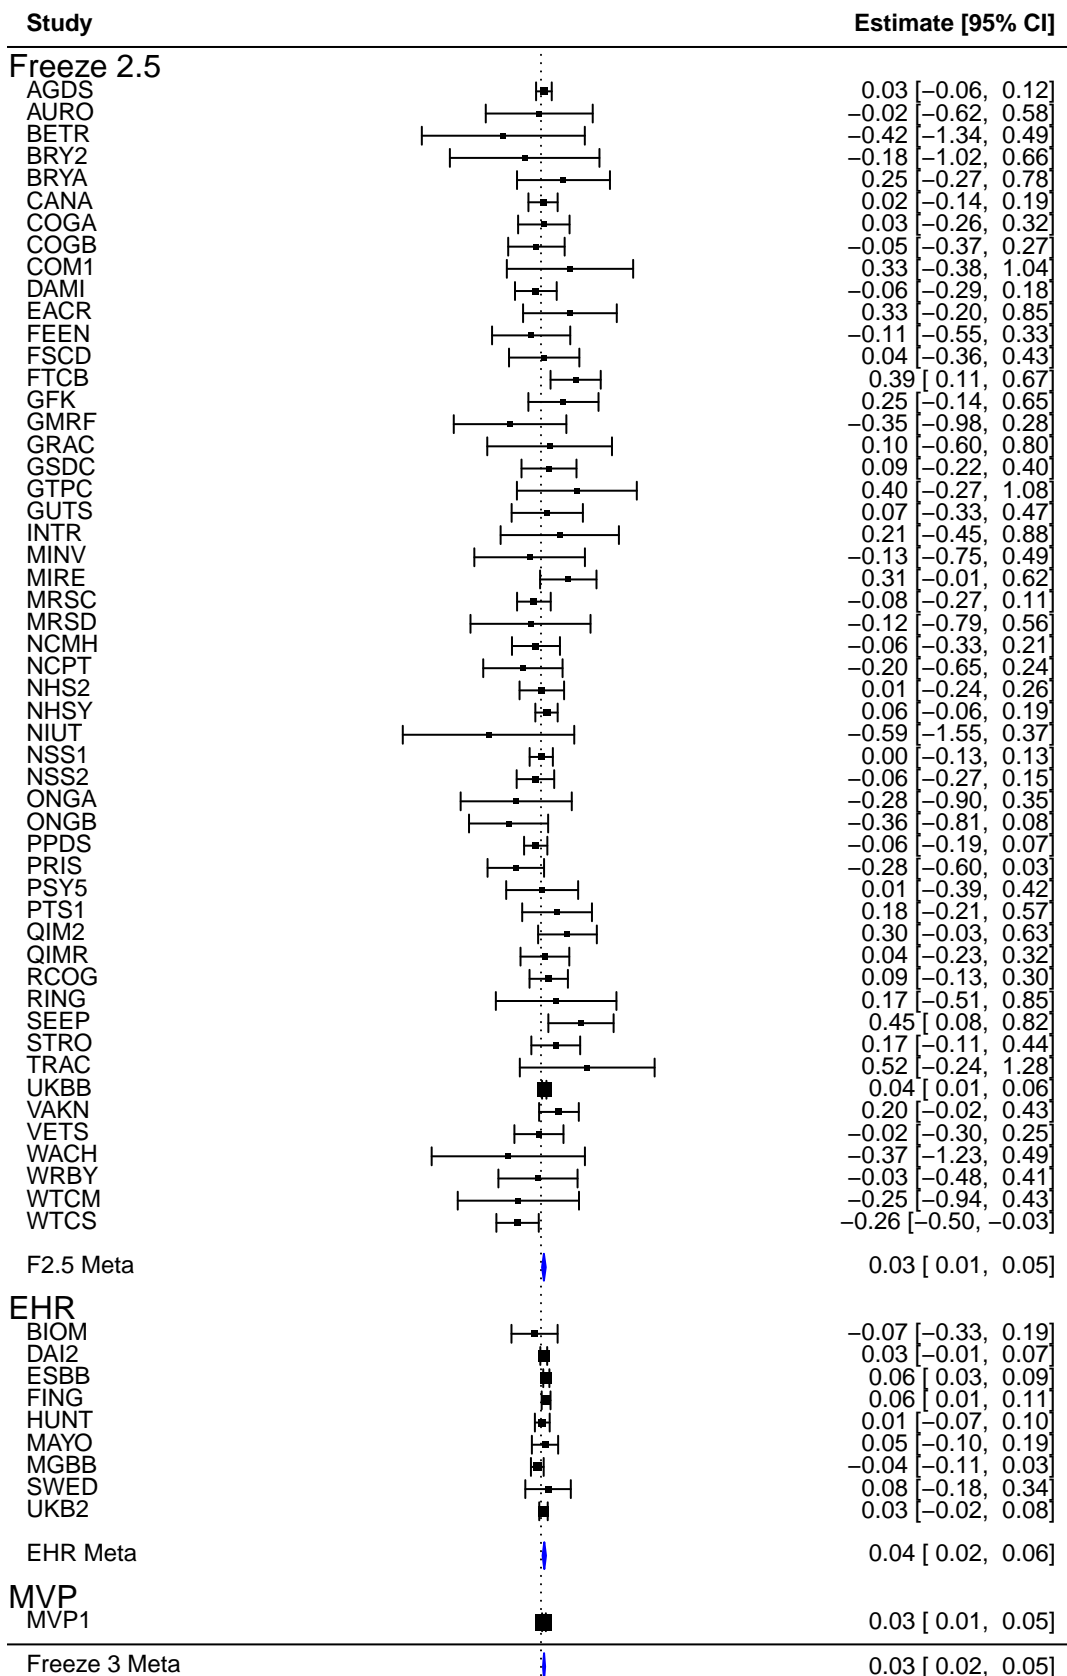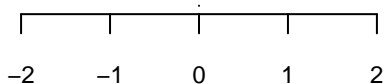

Observed Outcome

## rs10191758 (Locus 12)

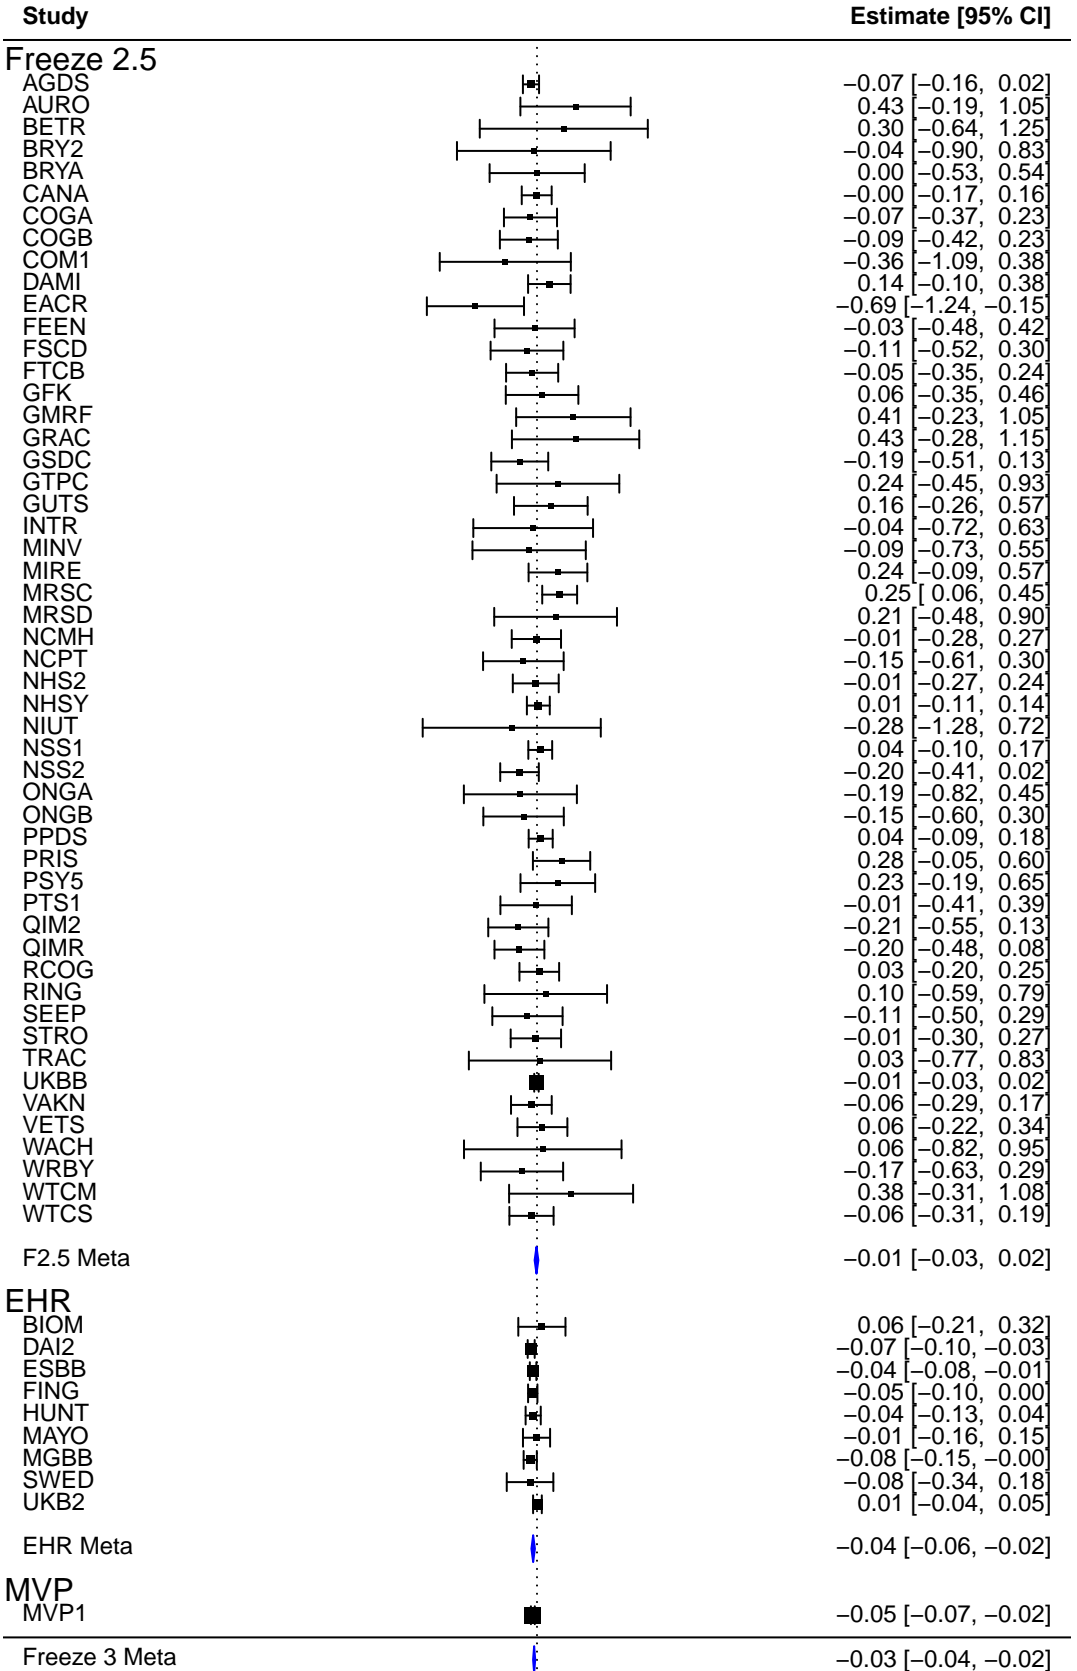

rs197261 (Locus 13)

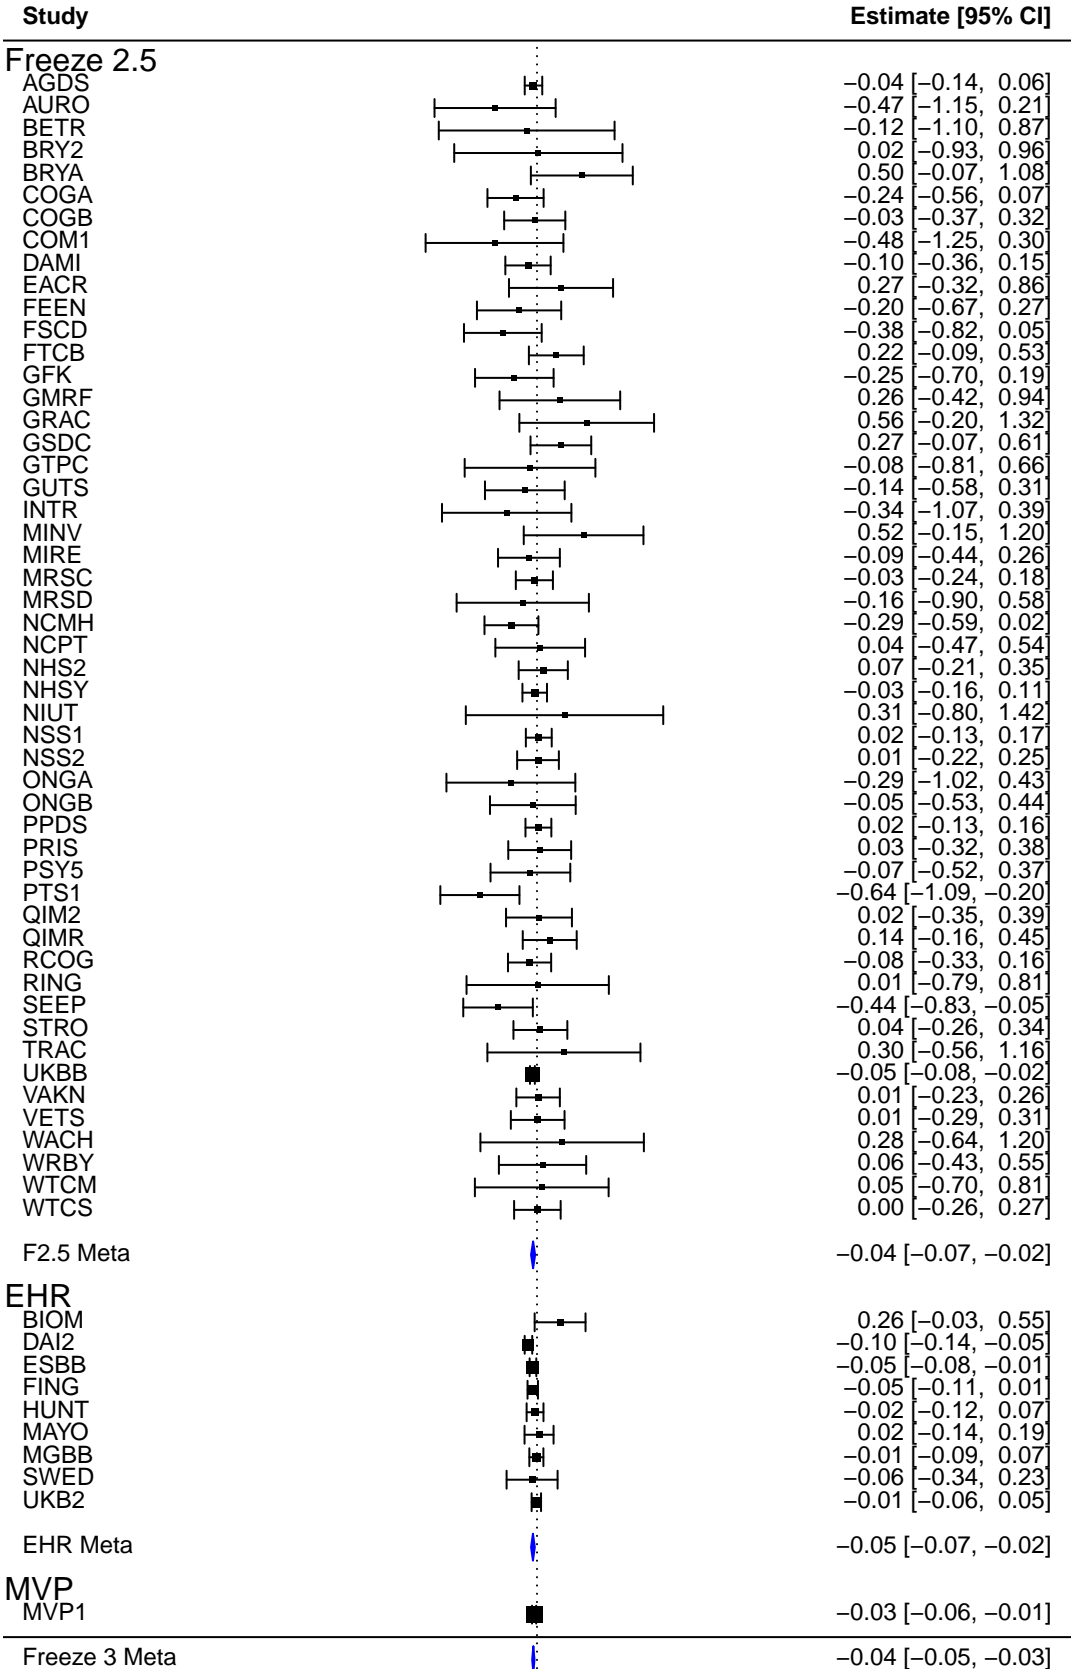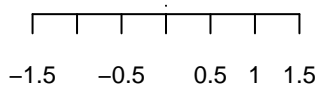

Observed Outcome

rs748832 (Locus 14)

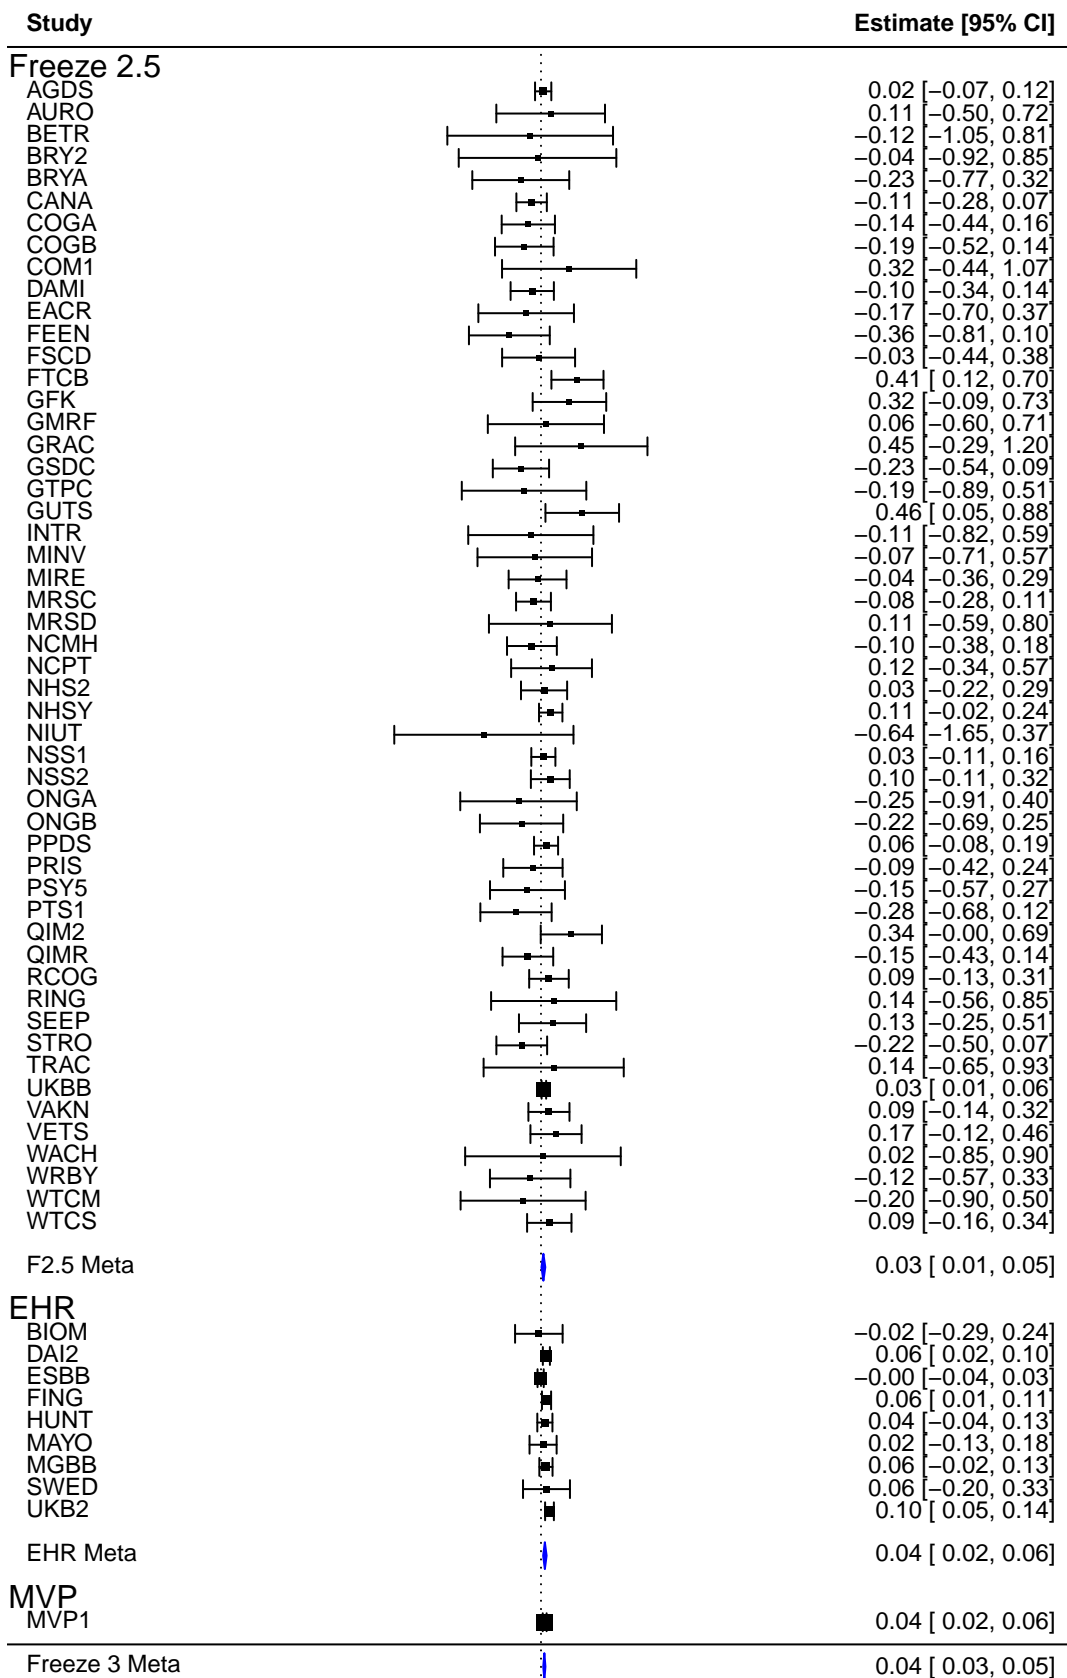

Observed Outcome

## rs6800637 (Locus 15)

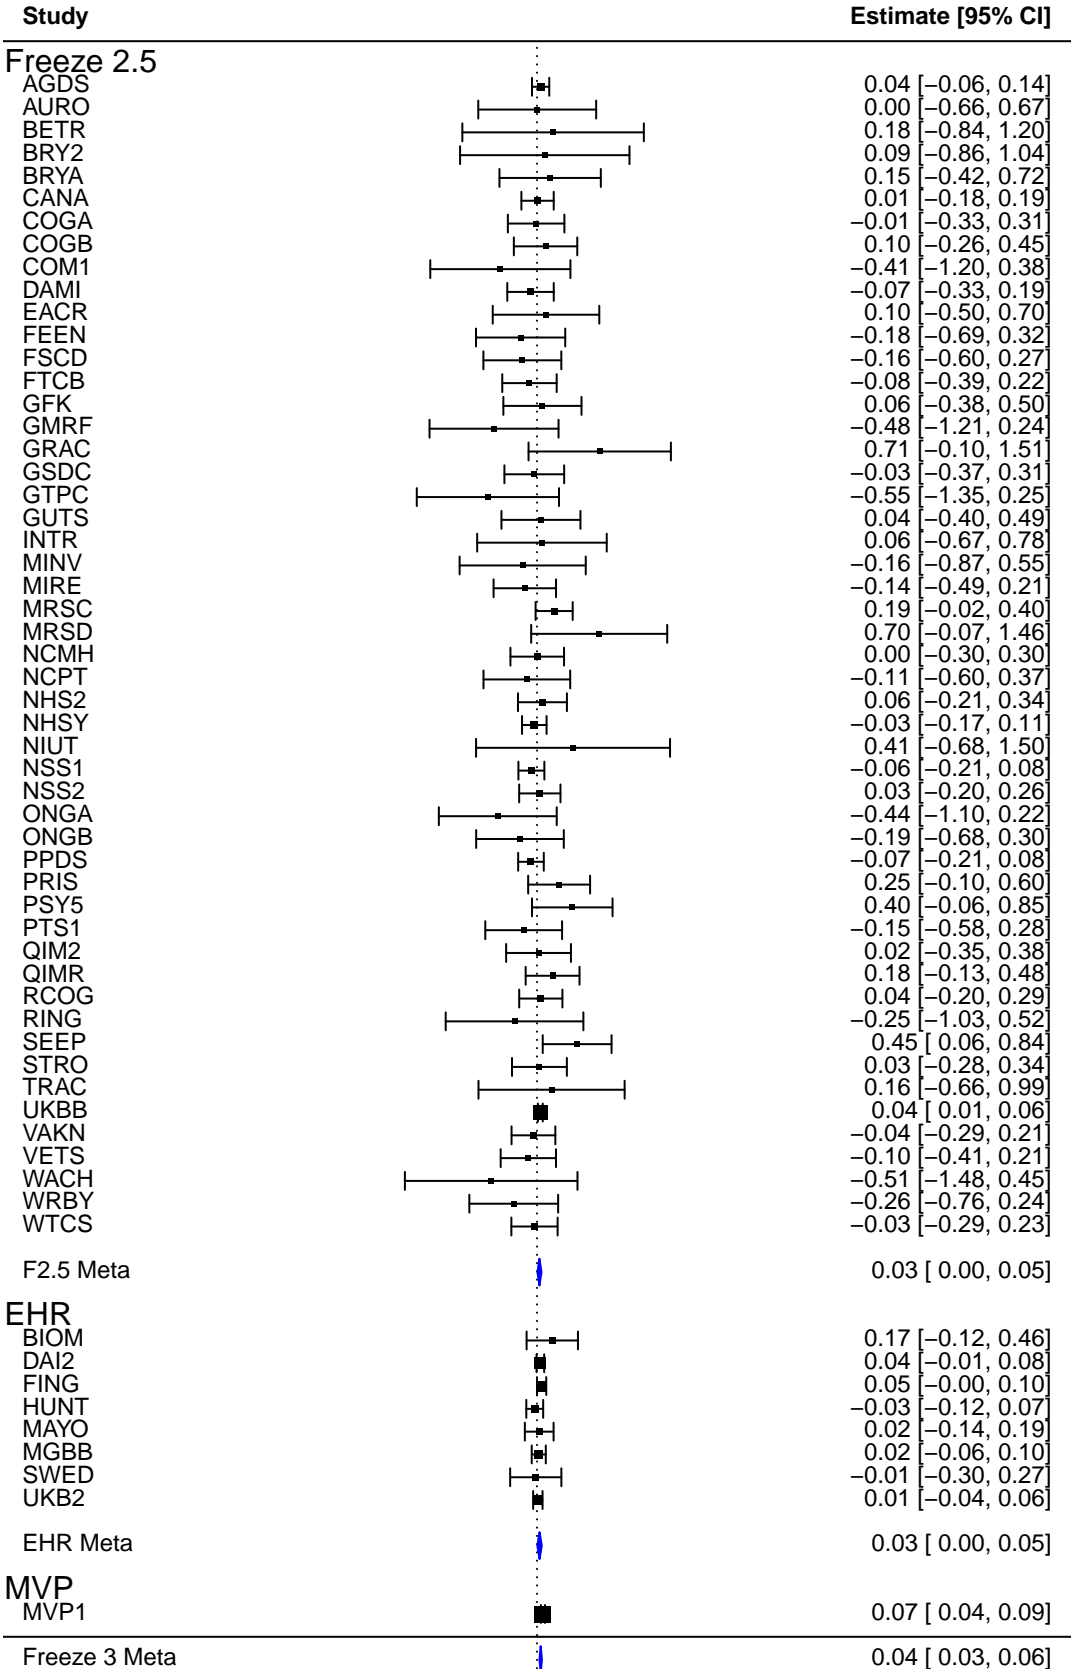



## rs6802567 (Locus 16)

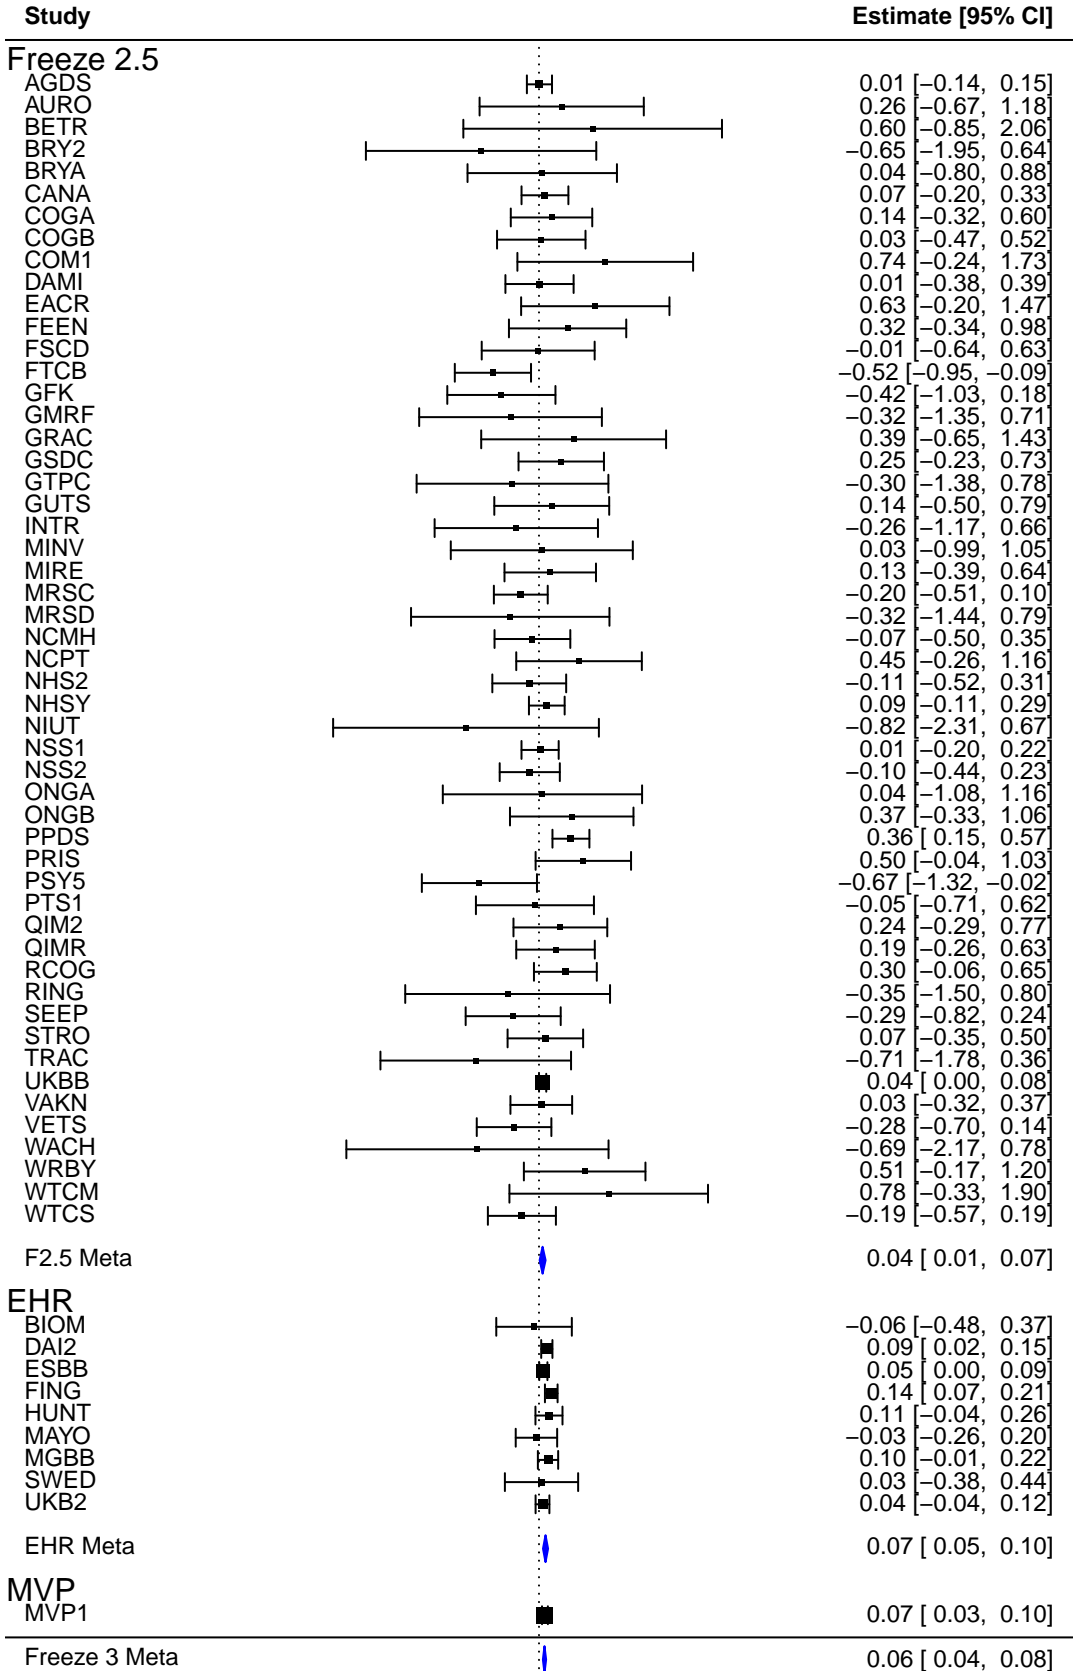

-3 -2 -1 0 1 2 3

Observed Outcome

## rs11130221 (Locus 17)

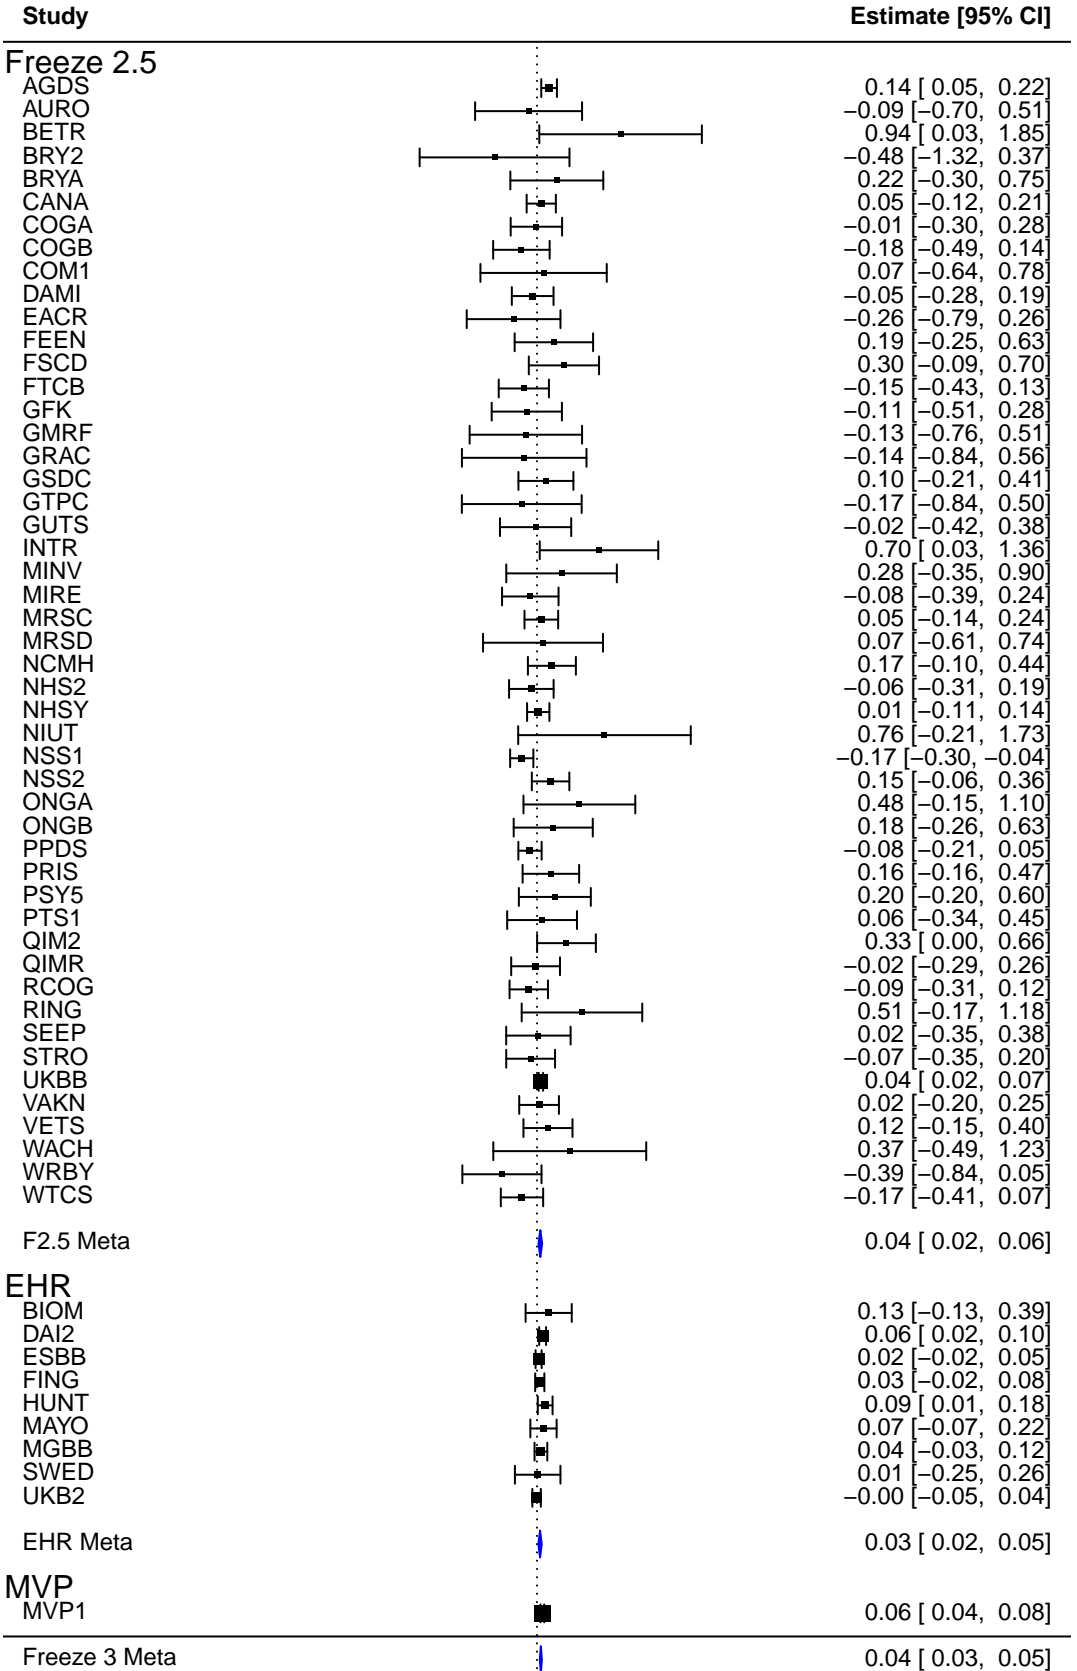

rs1541903 (Locus 18)

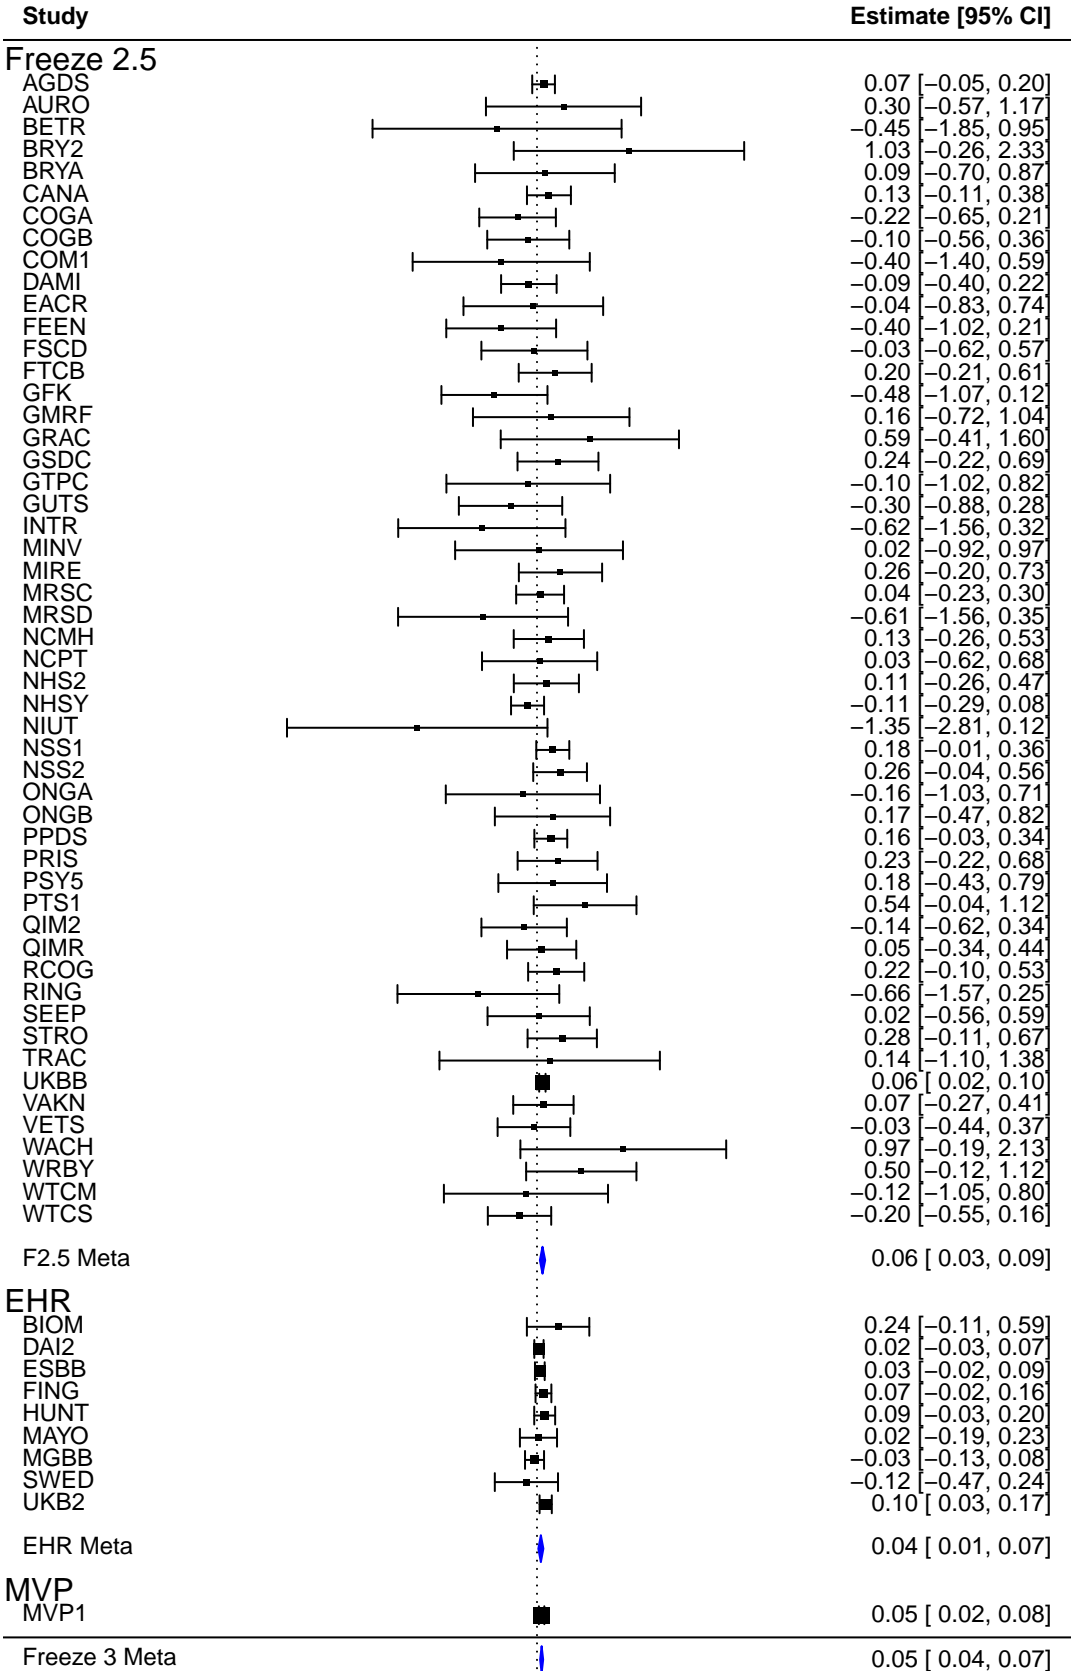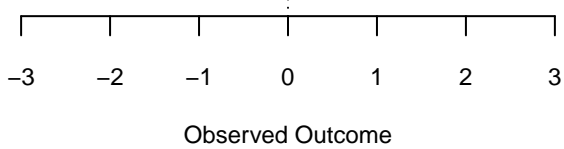

rs34811474 (Locus 19)

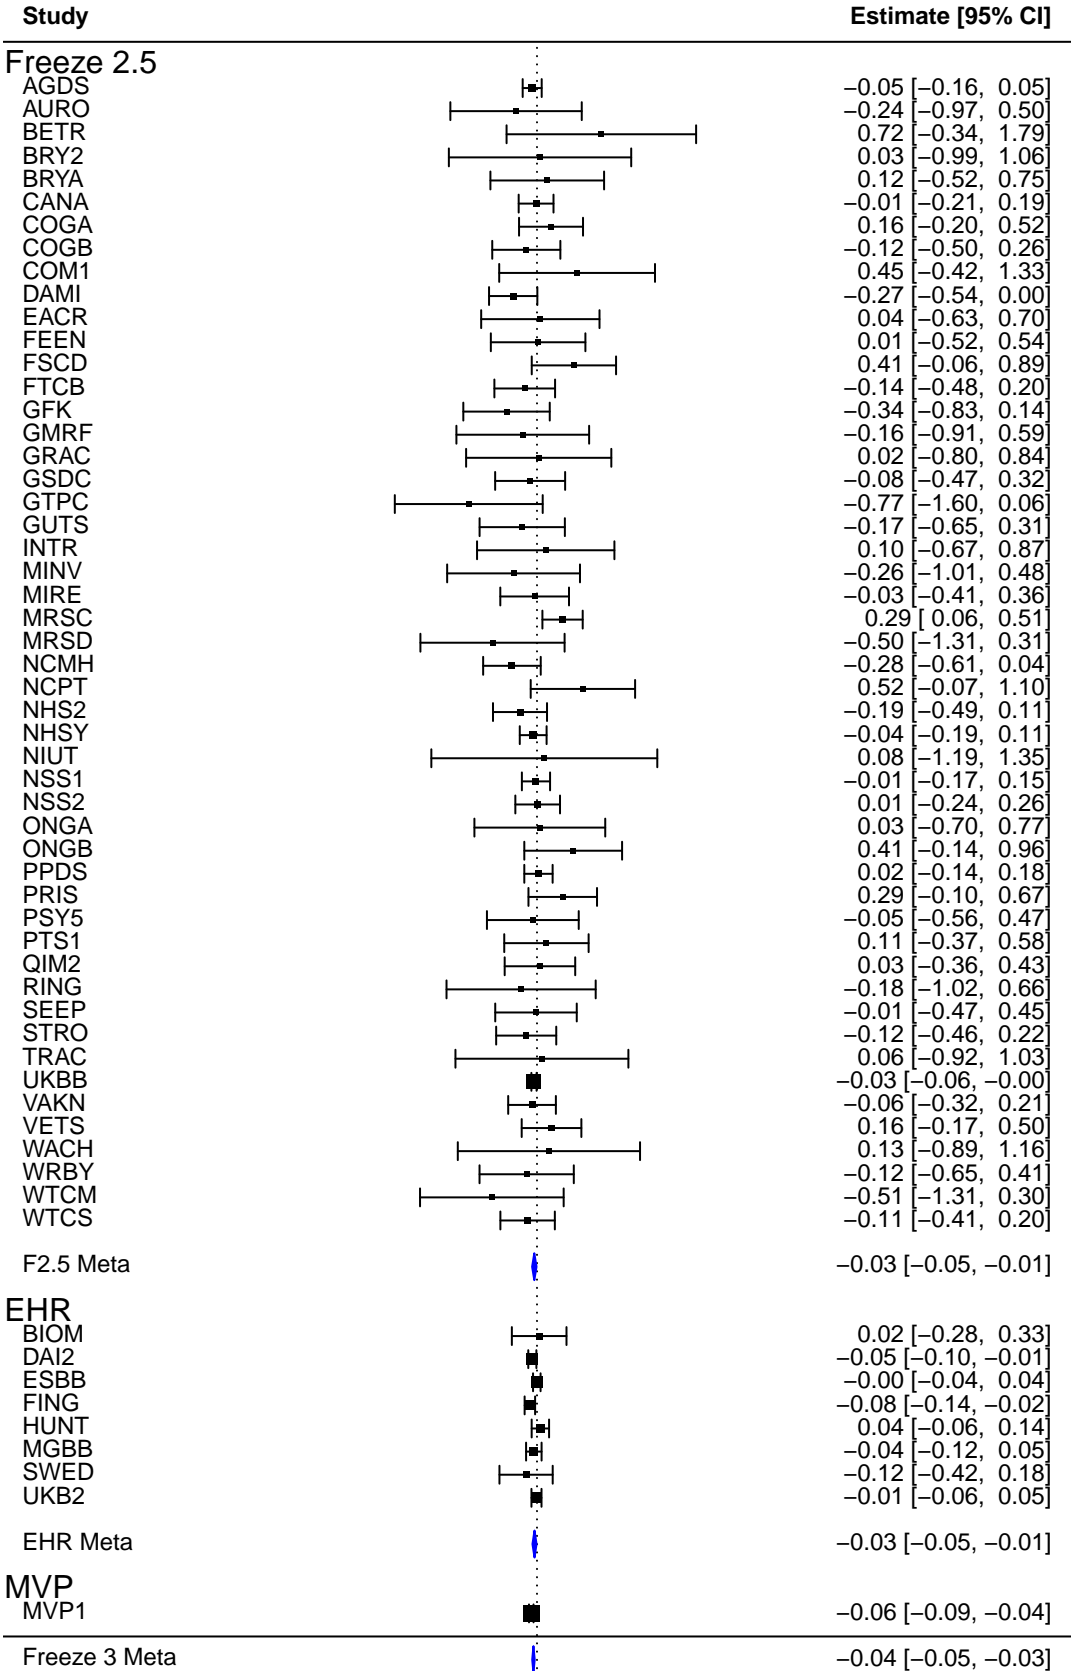

Observed Outcome

rs12521971 (Locus 20)

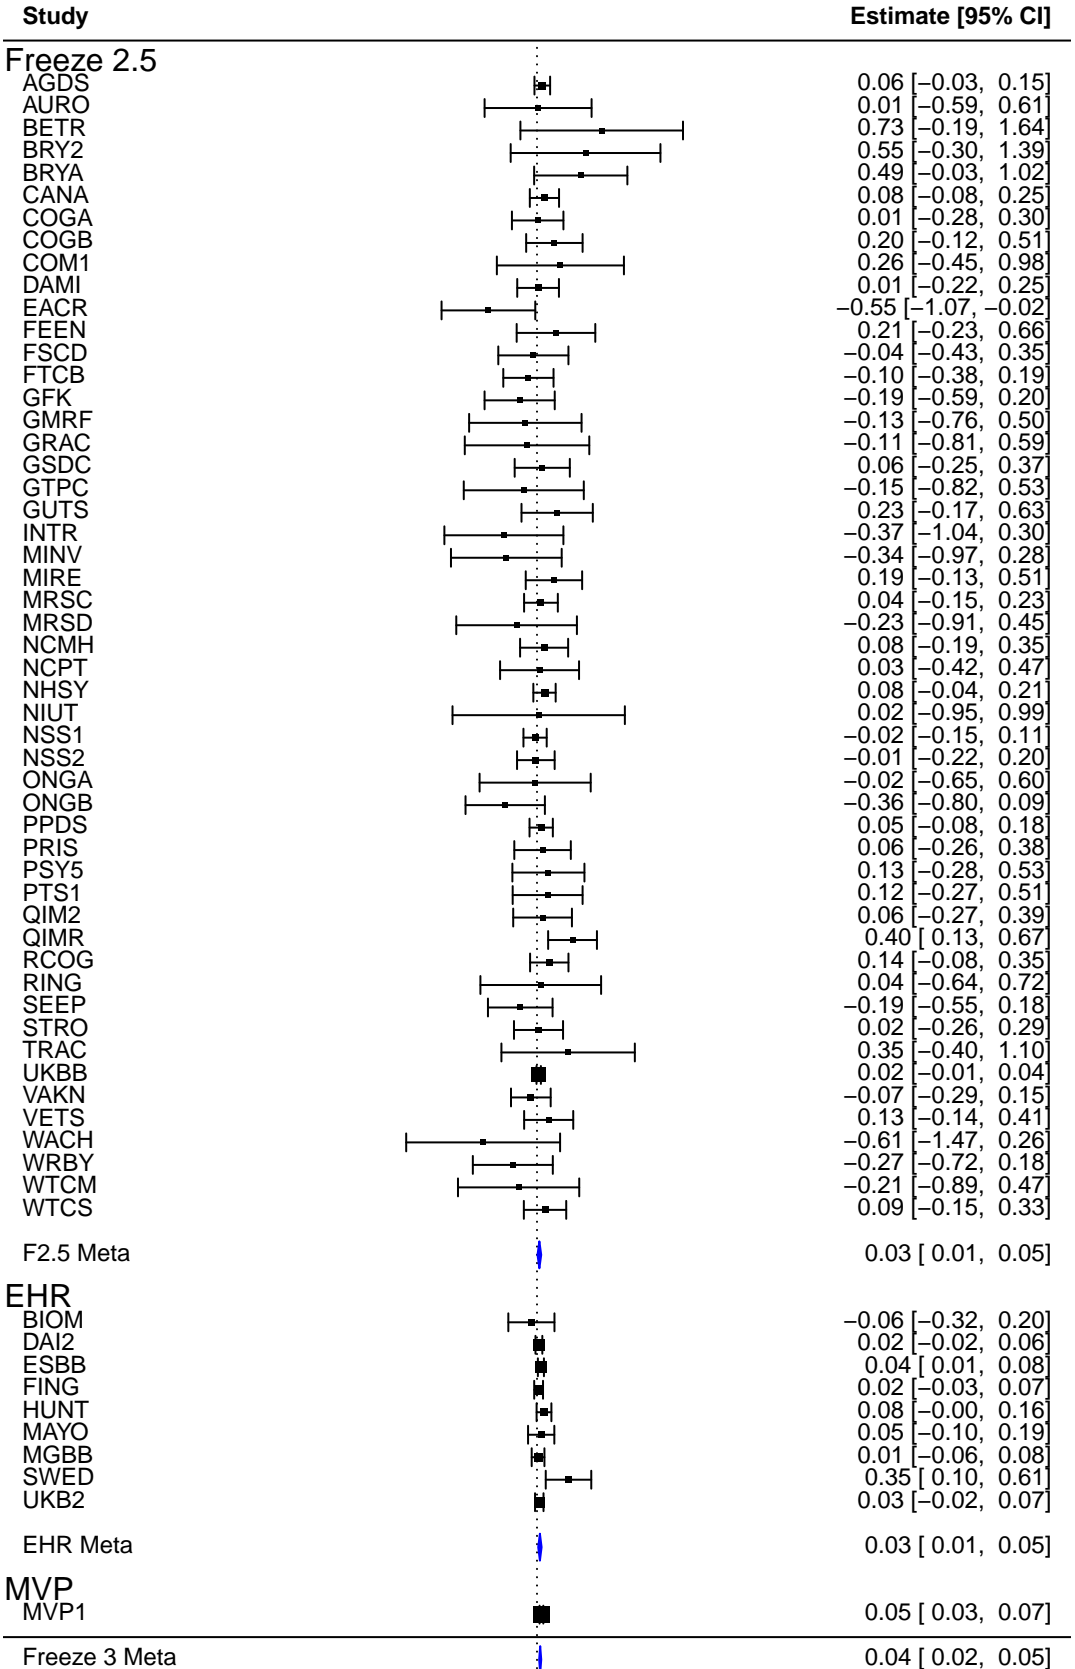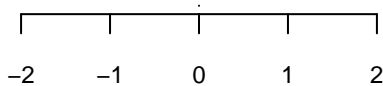

Observed Outcome

## rs4489042 (Locus 21)

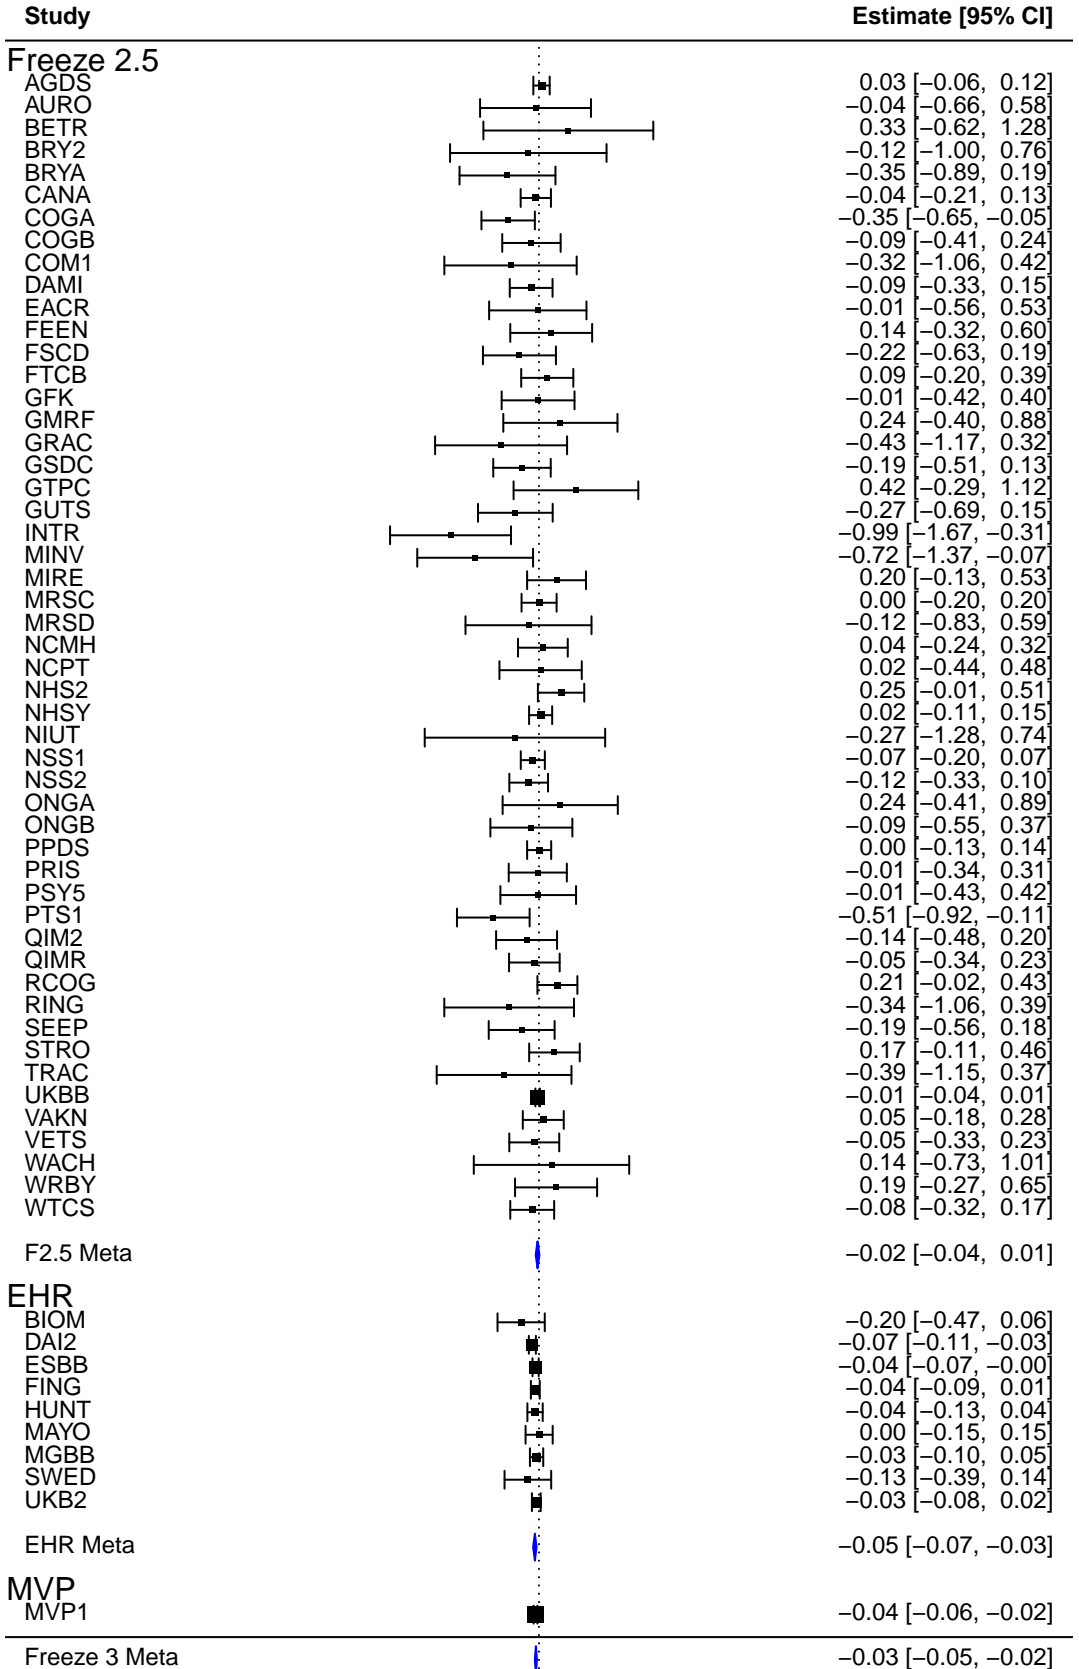

rs33817 (Locus 22)

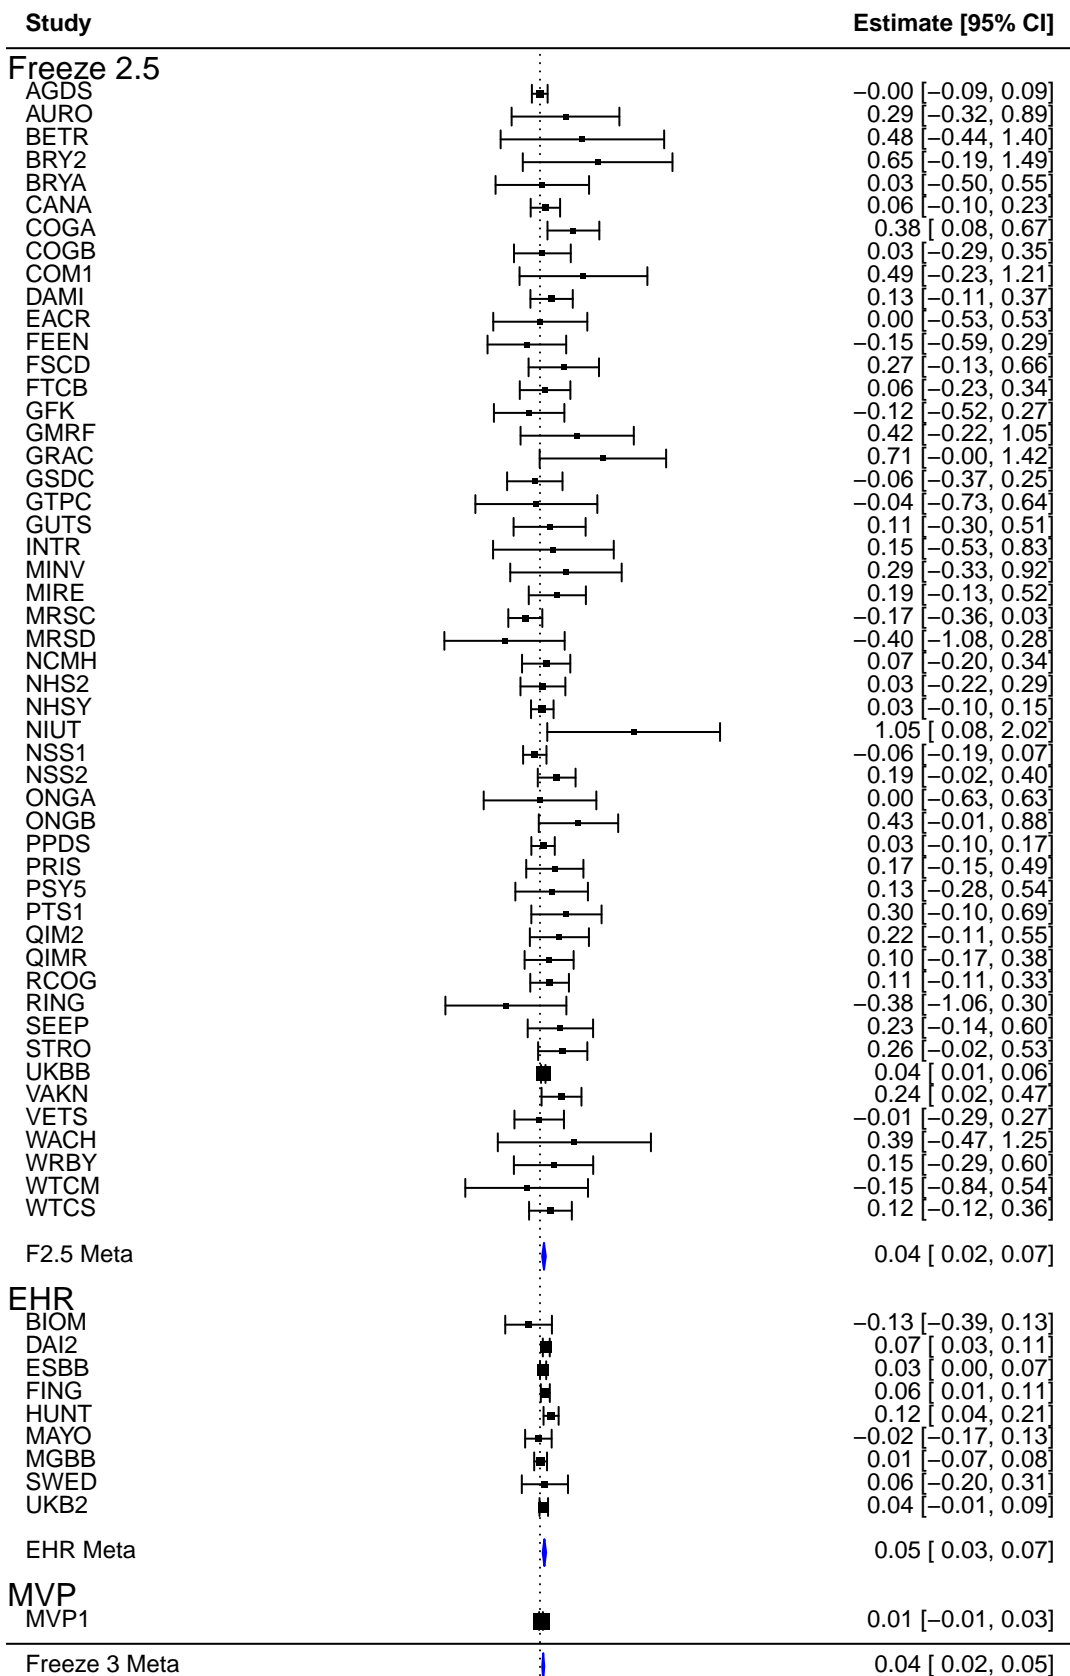

Observed Outcome

## rs295017 (Locus 23)

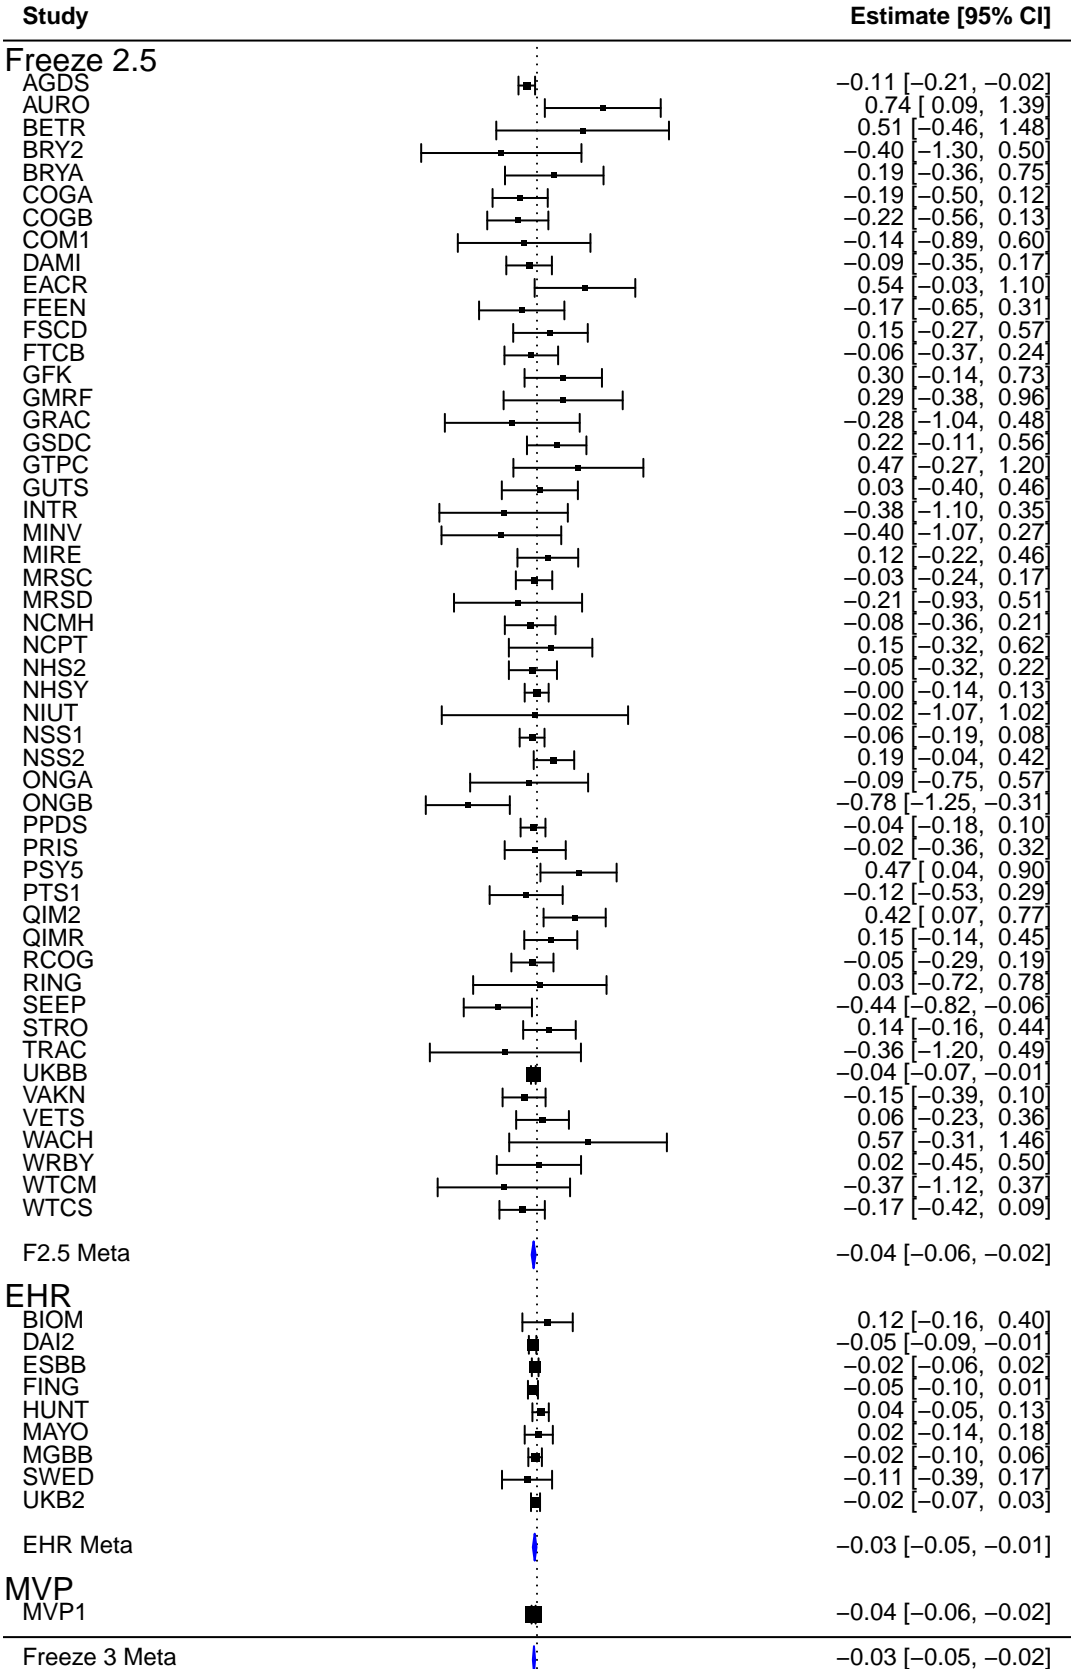



## rs13161130 (Locus 24)

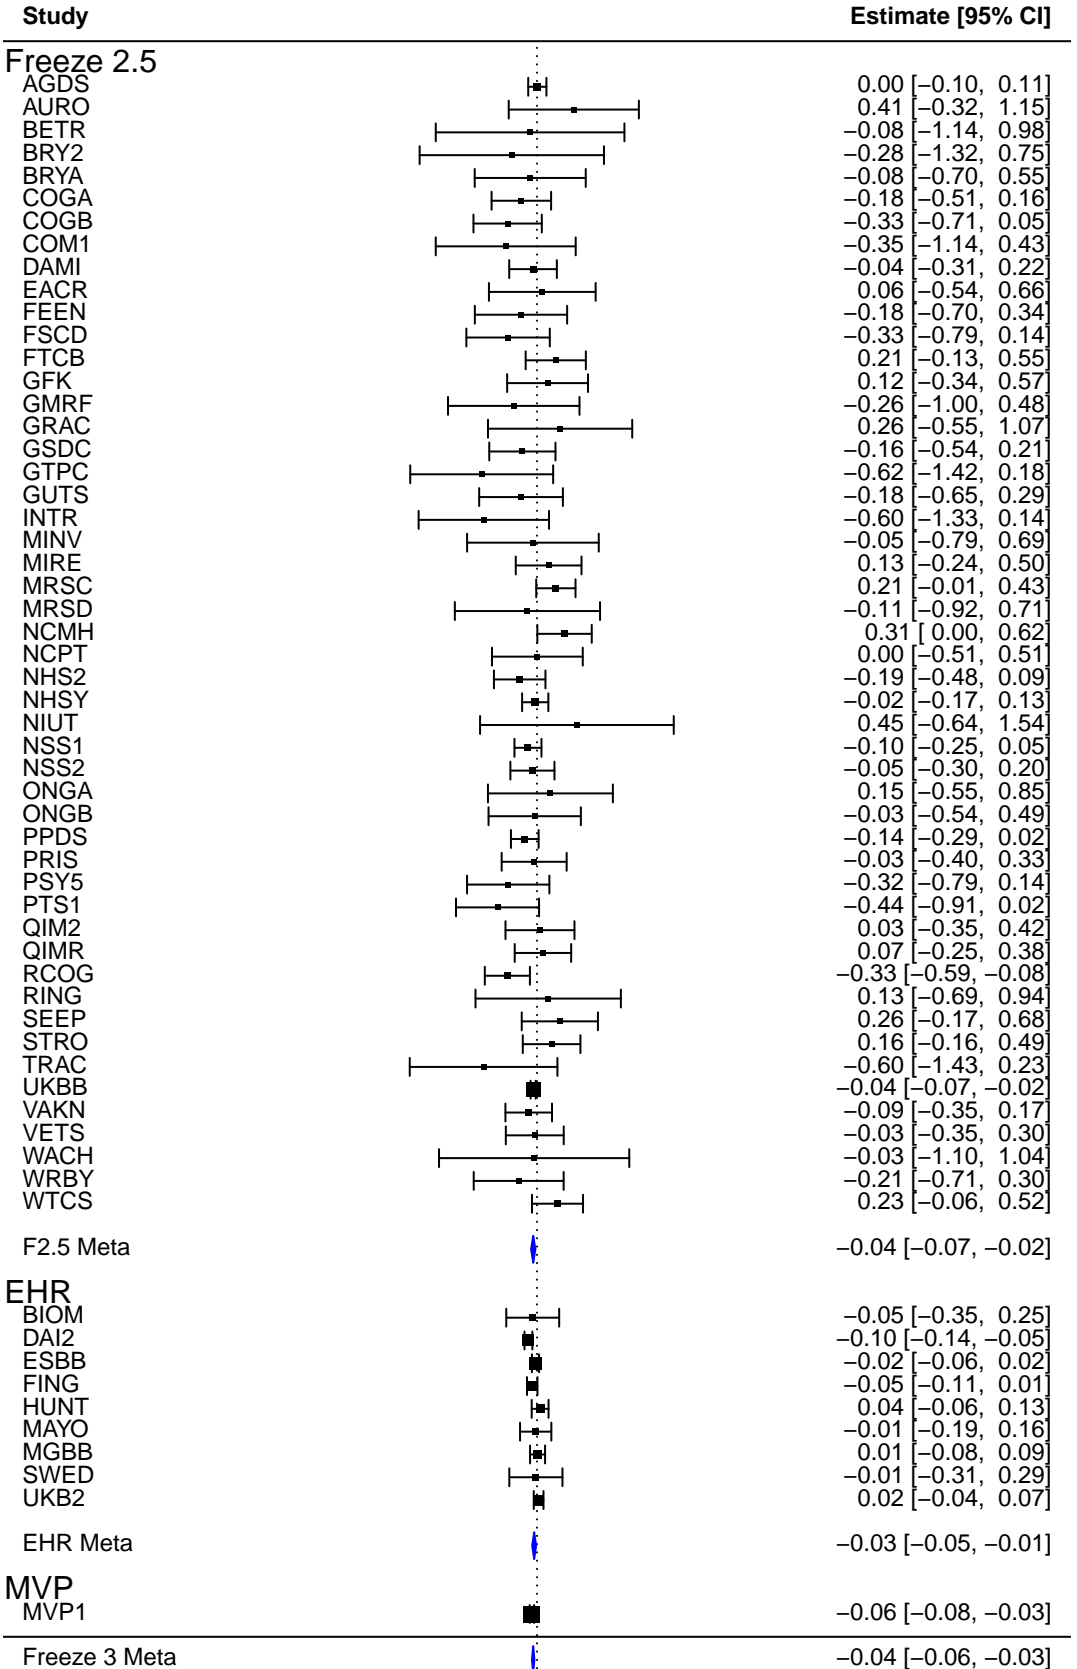

rs34425 (Locus 25)

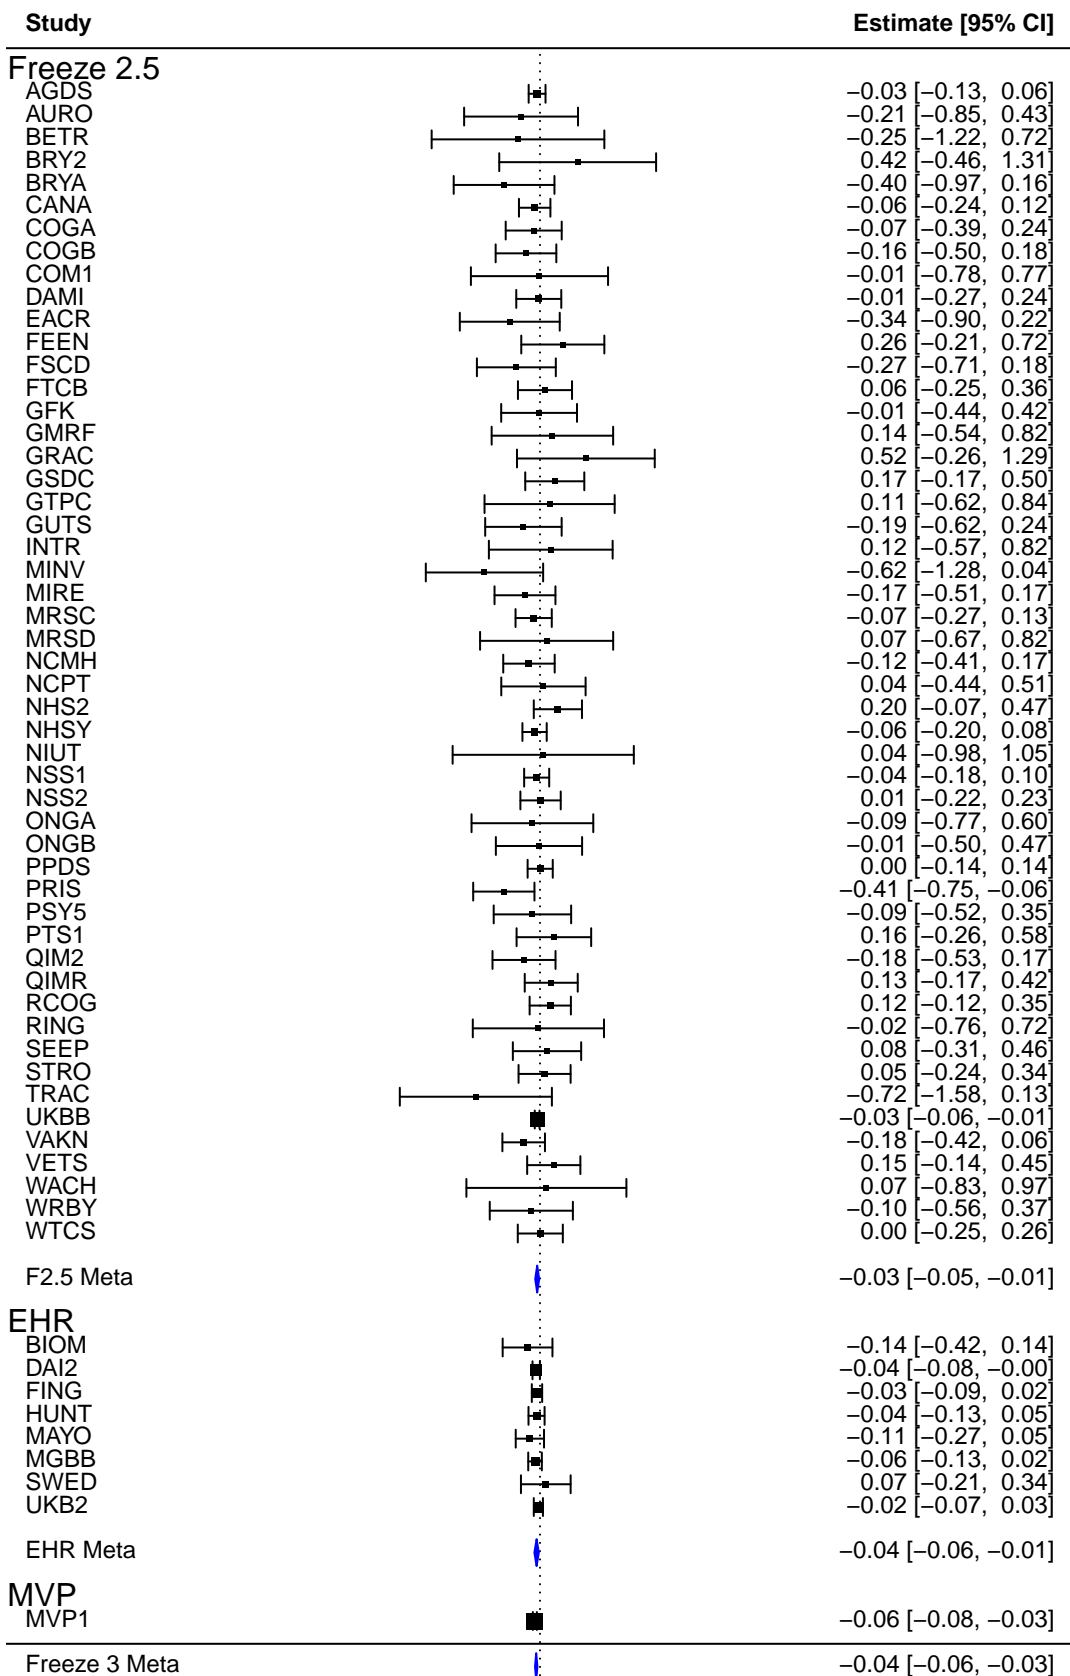

Observed Outcome

rs175086 (Locus 26)

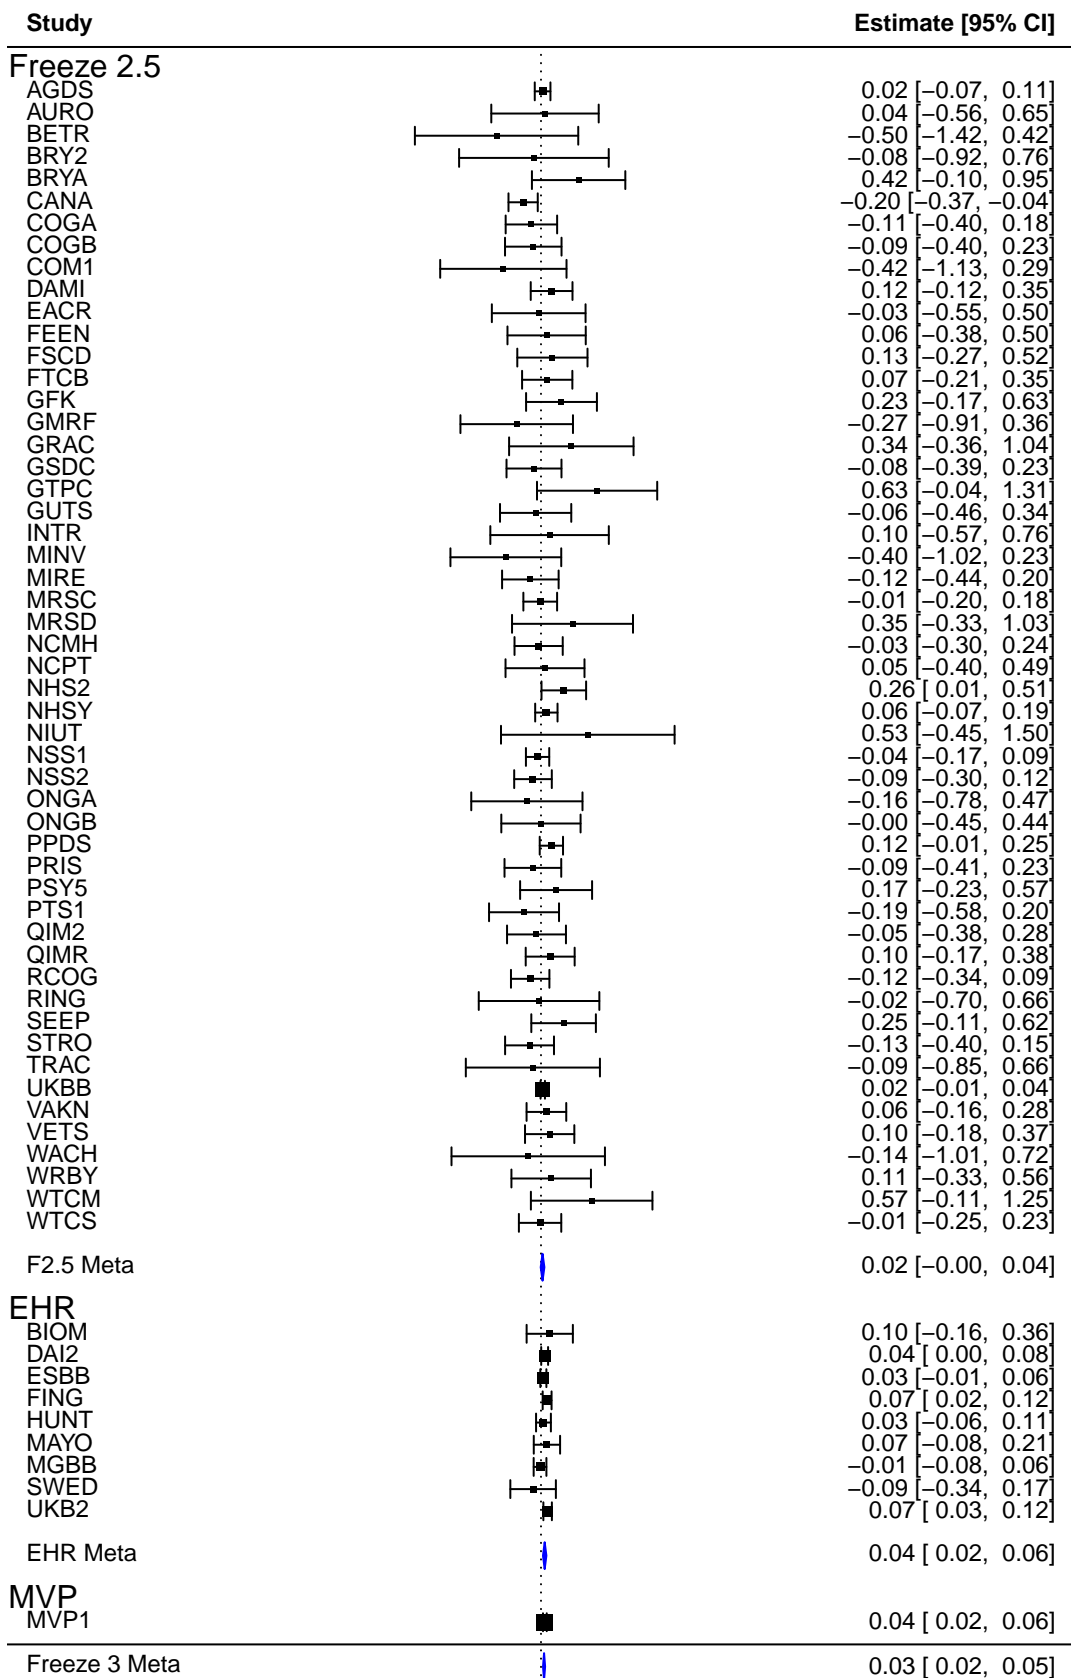

Observed Outcome

## rs4257818 (Locus 27)

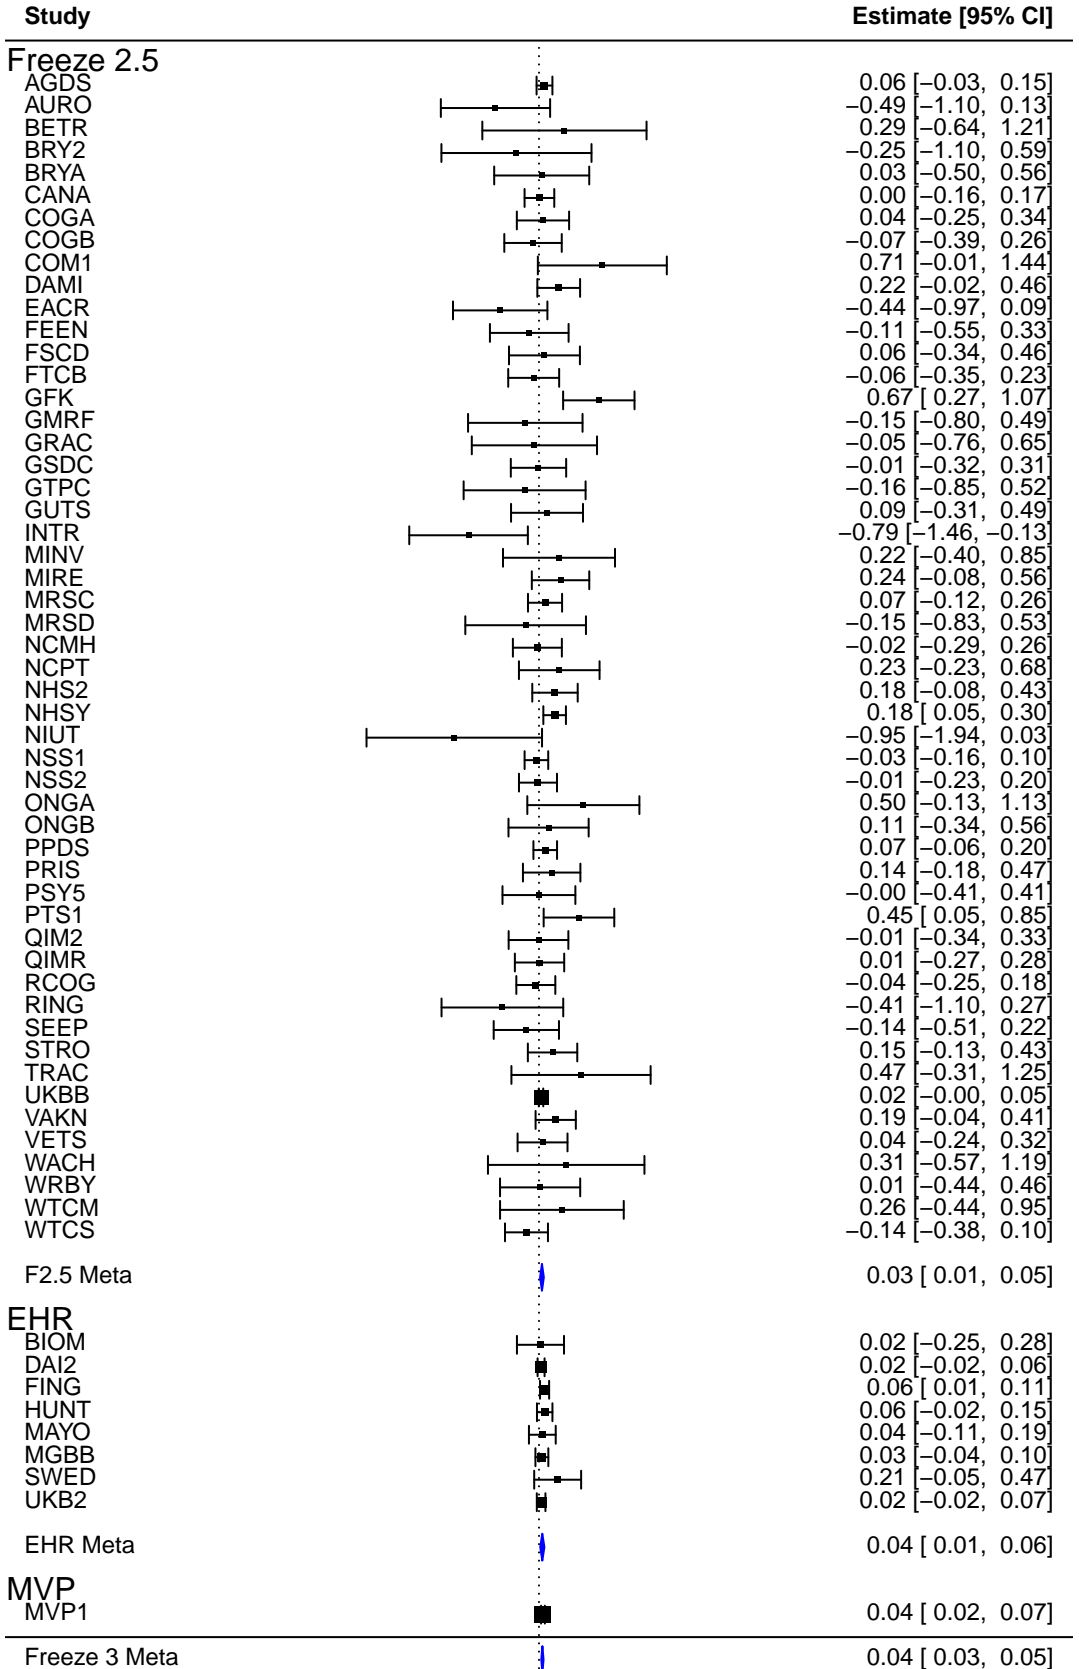

-2 -1 0 1 2

Observed Outcome

rs13168358 (Locus 28)

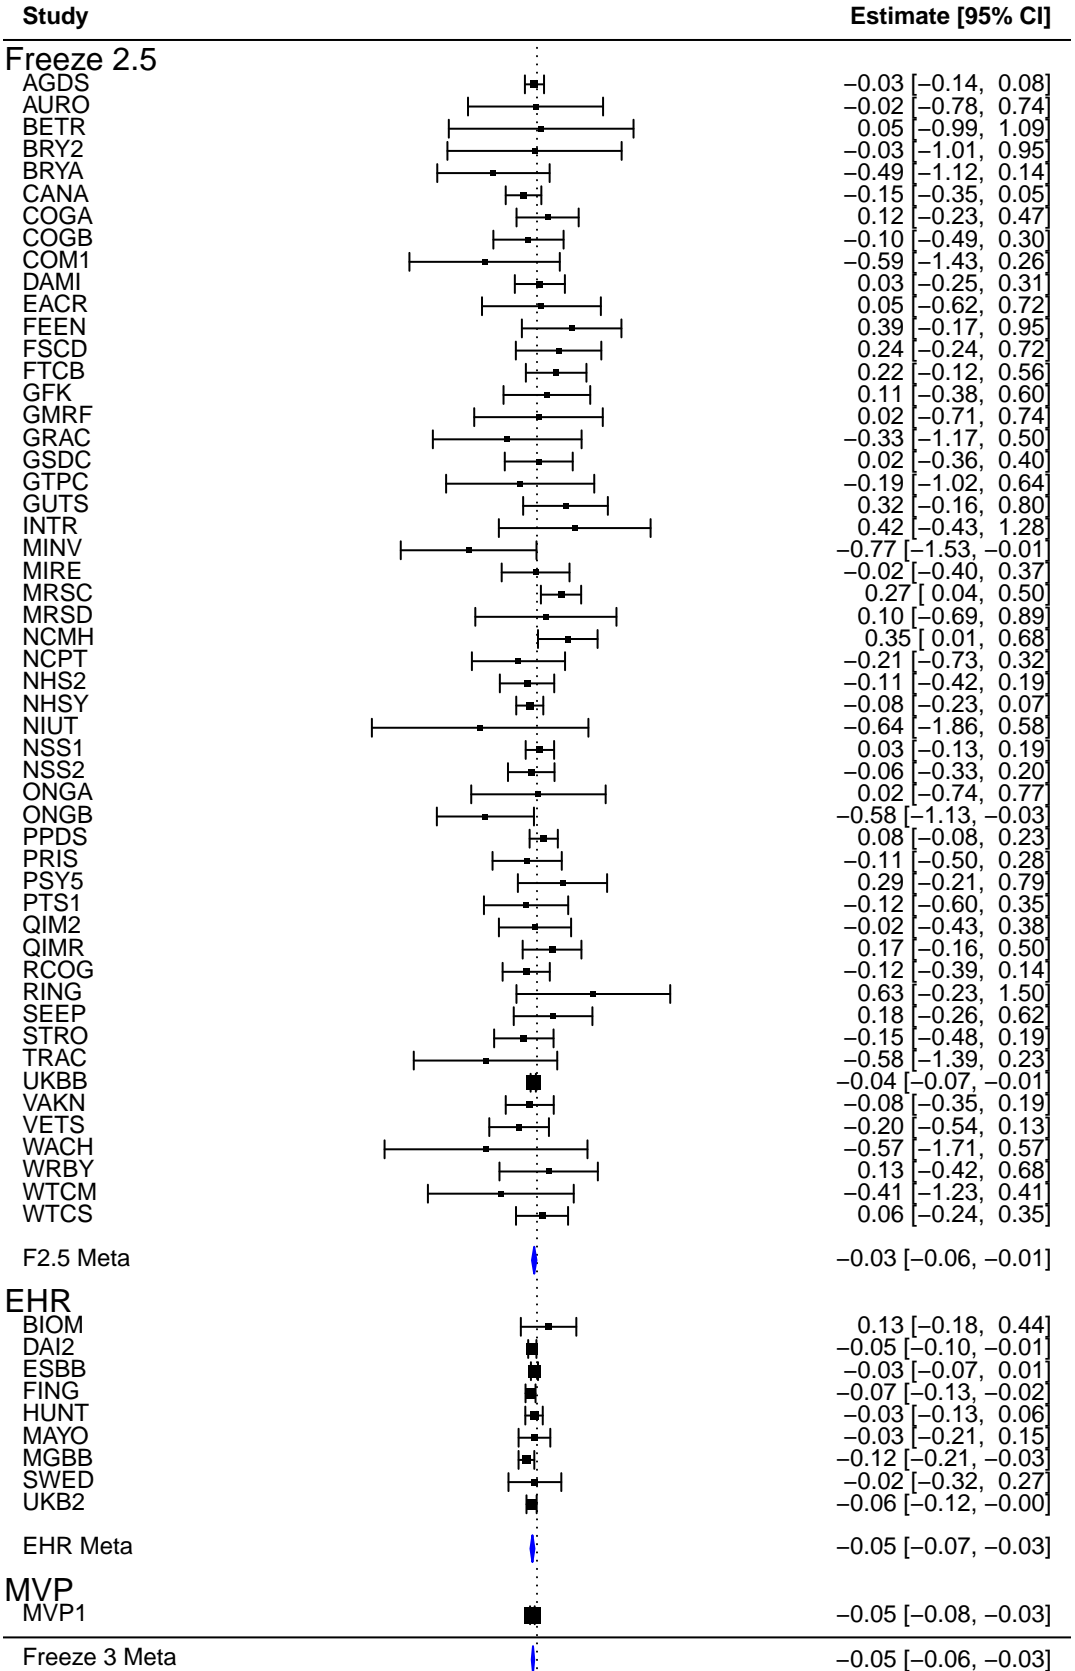

Observed Outcome

rs2135029 (Locus 29)

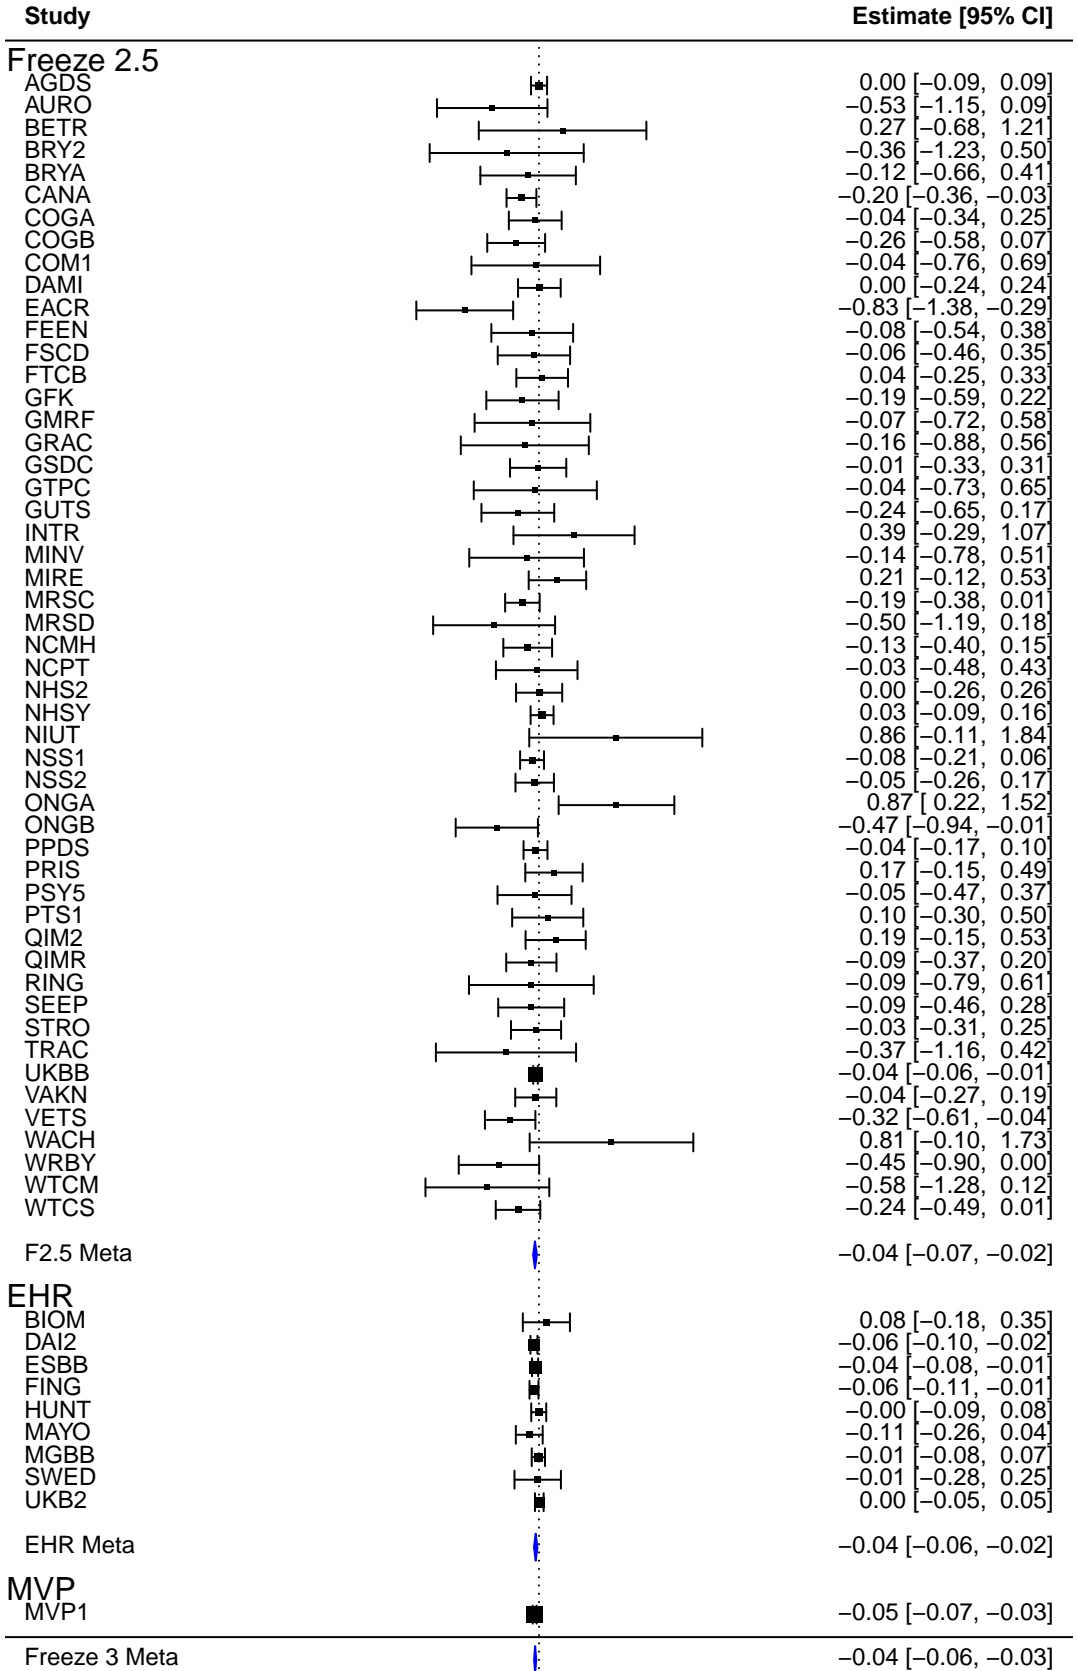

Observed Outcome

## rs11957630 (Locus 30)

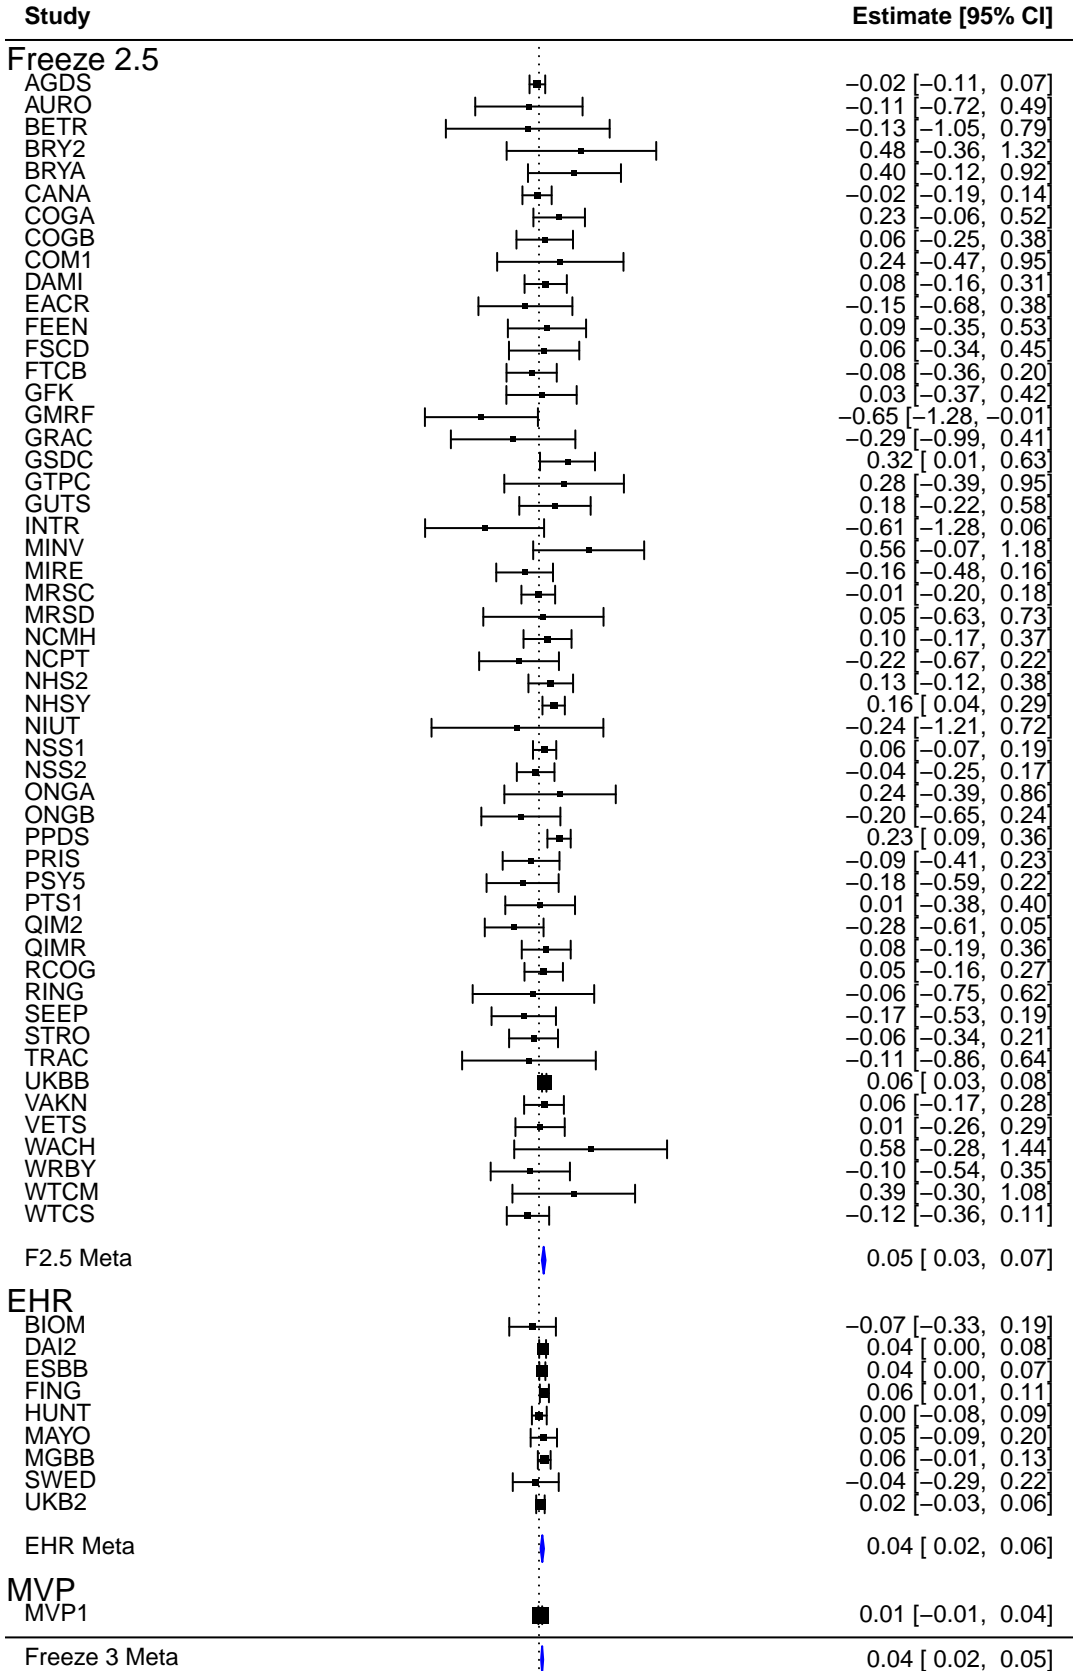

rs29242 (Locus 31)

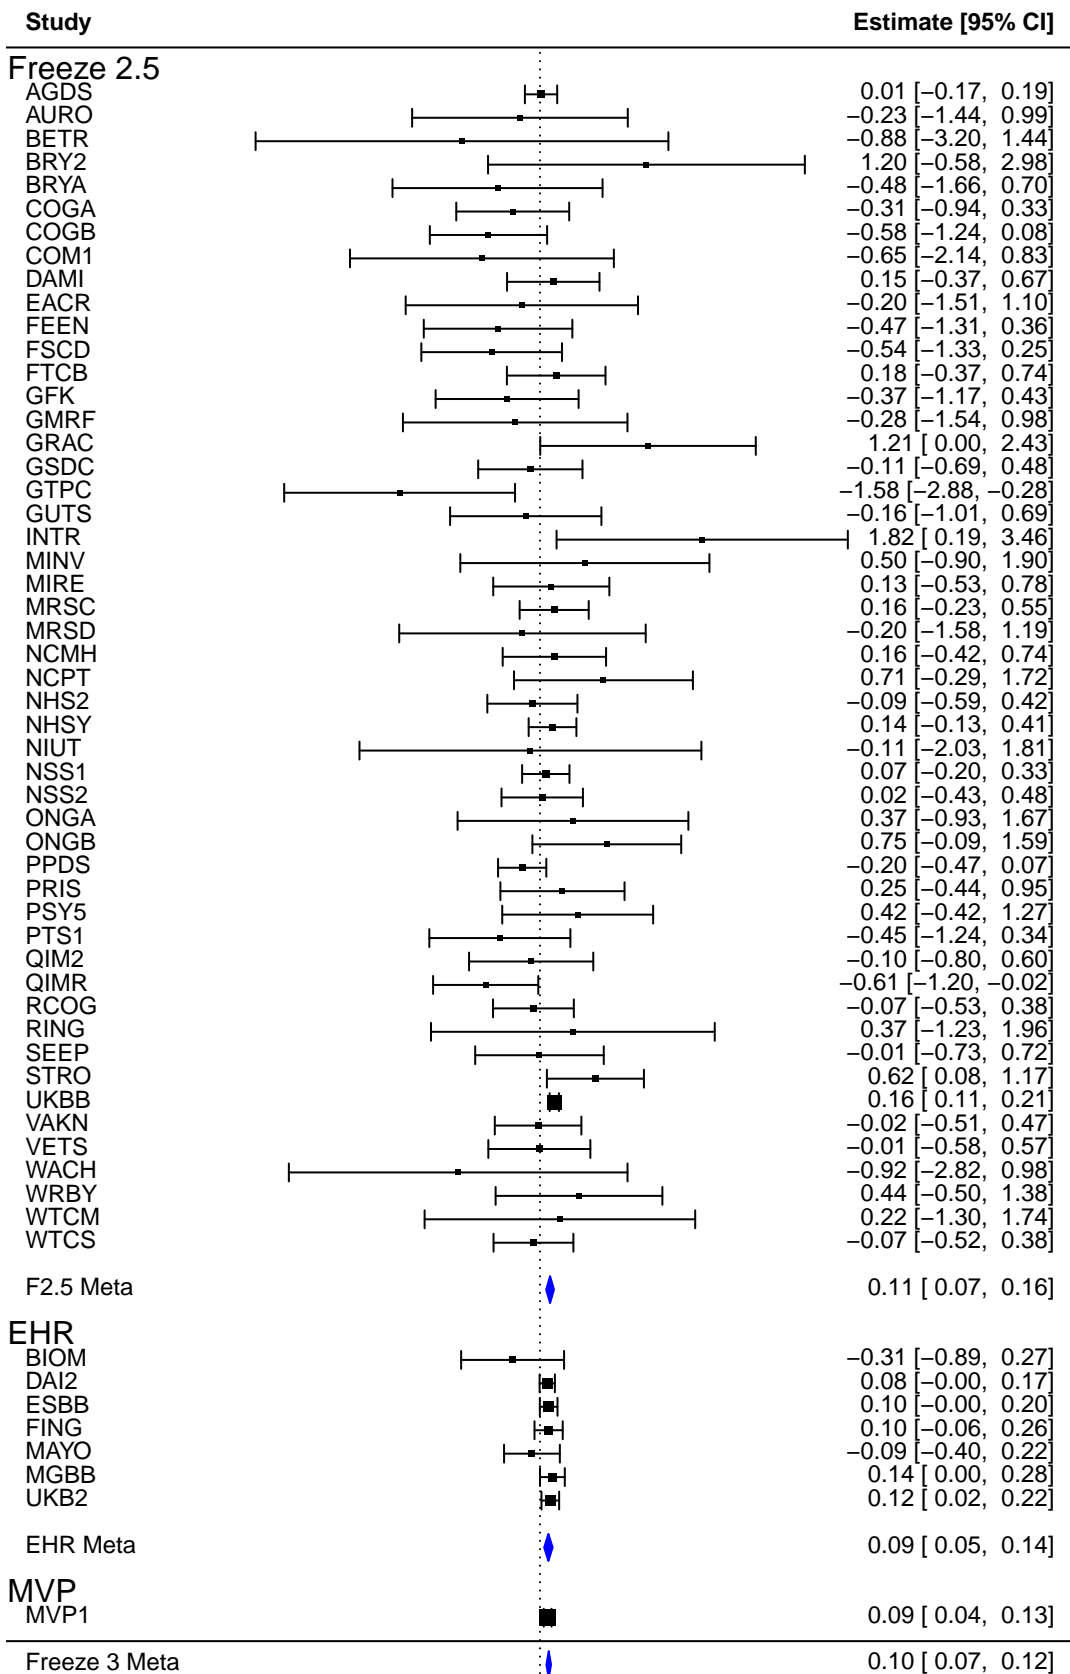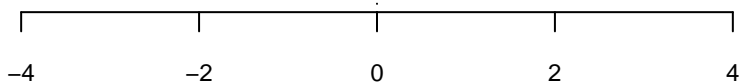

Observed Outcome



rs180963 (Locus 32)

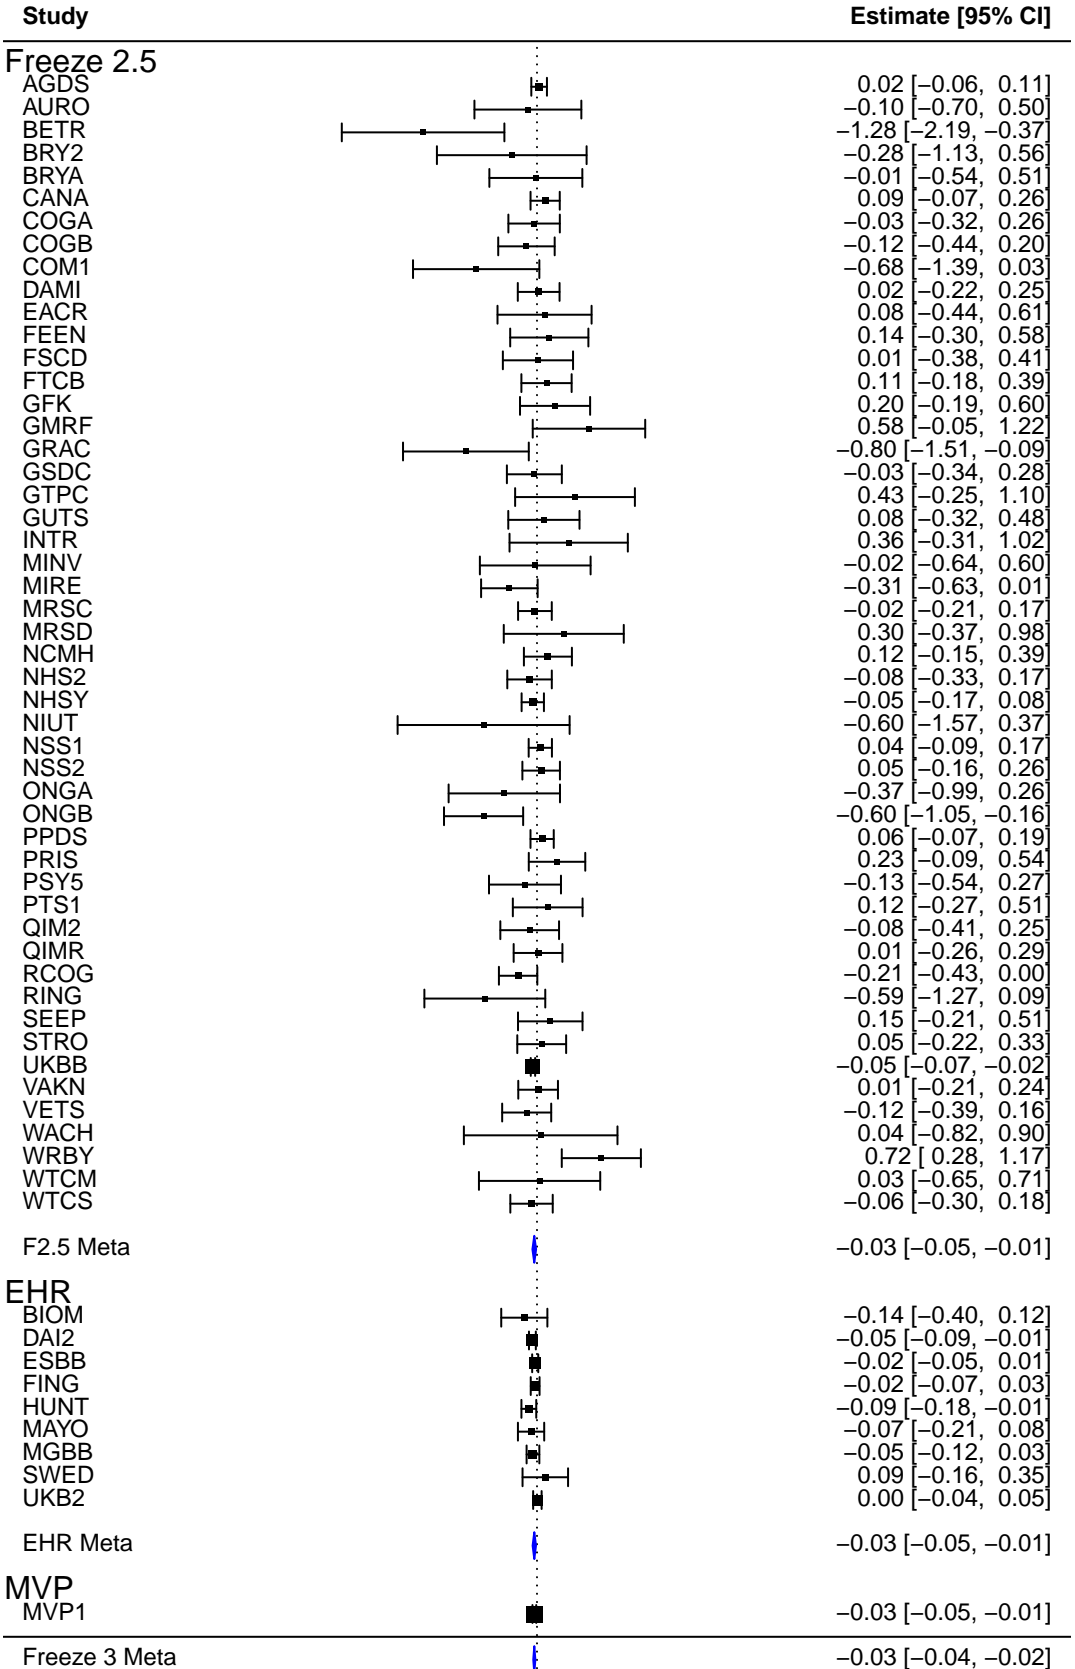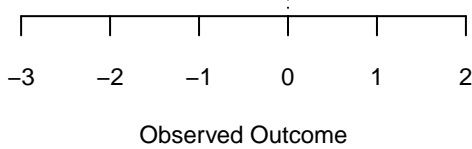

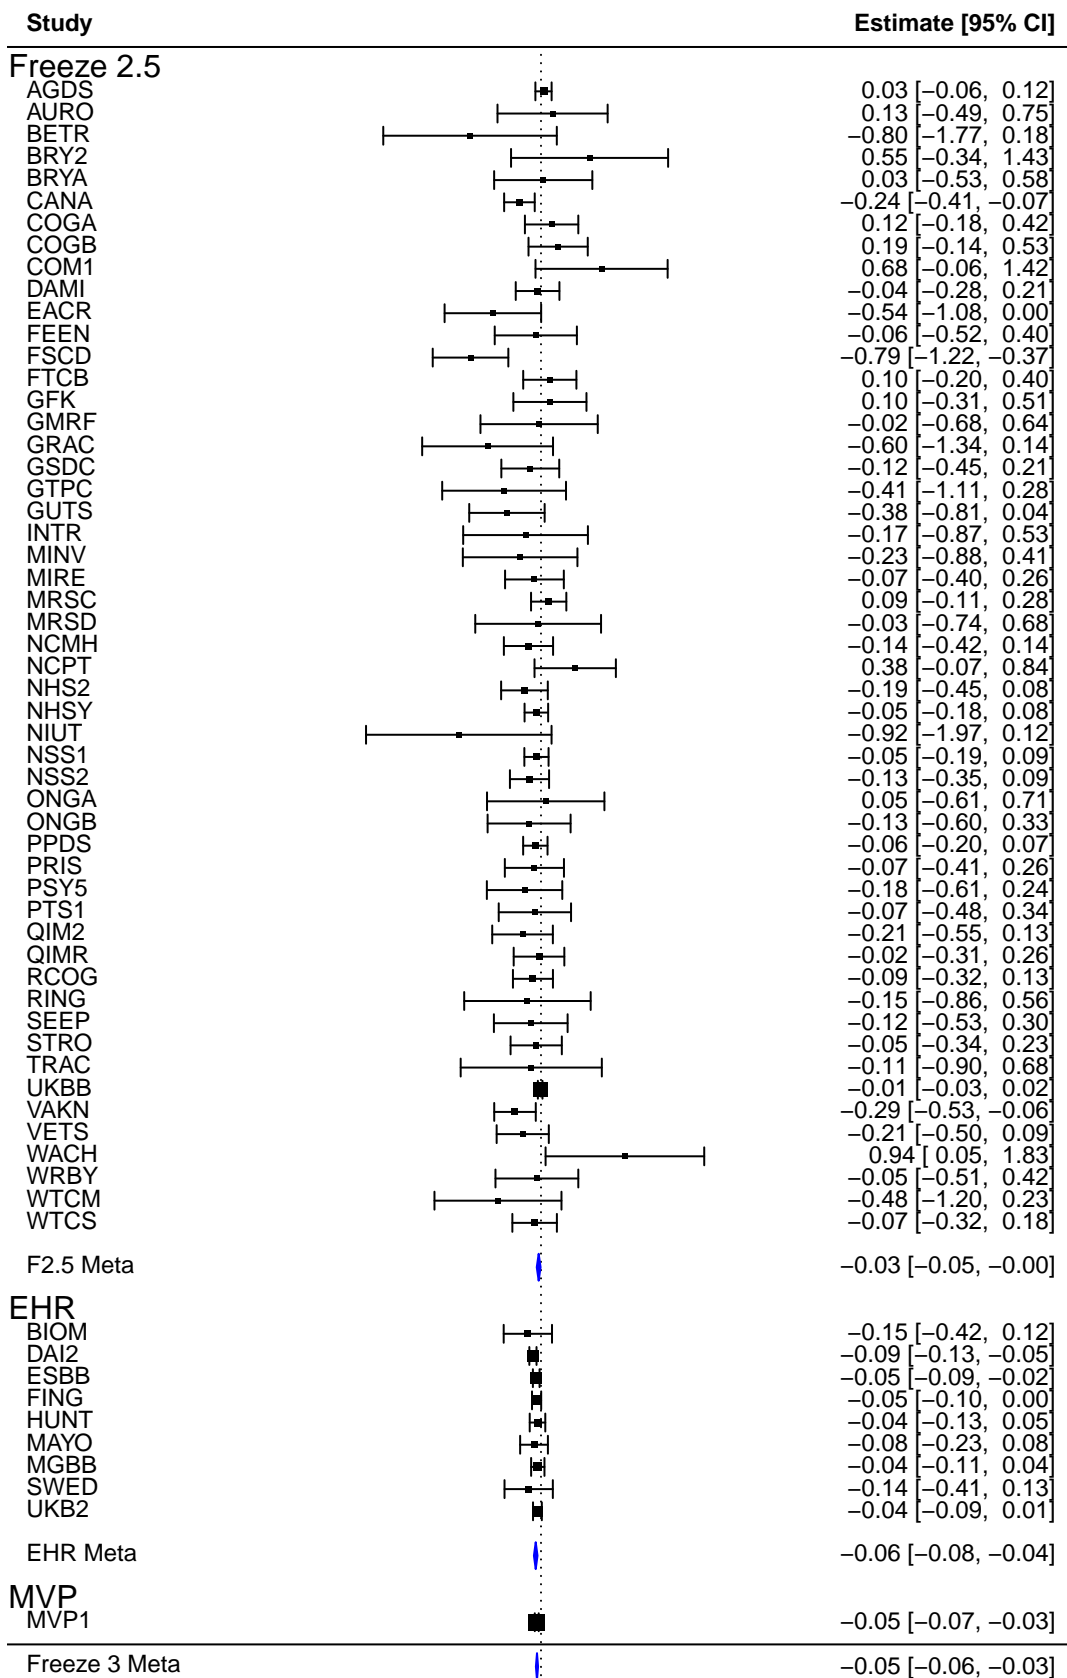

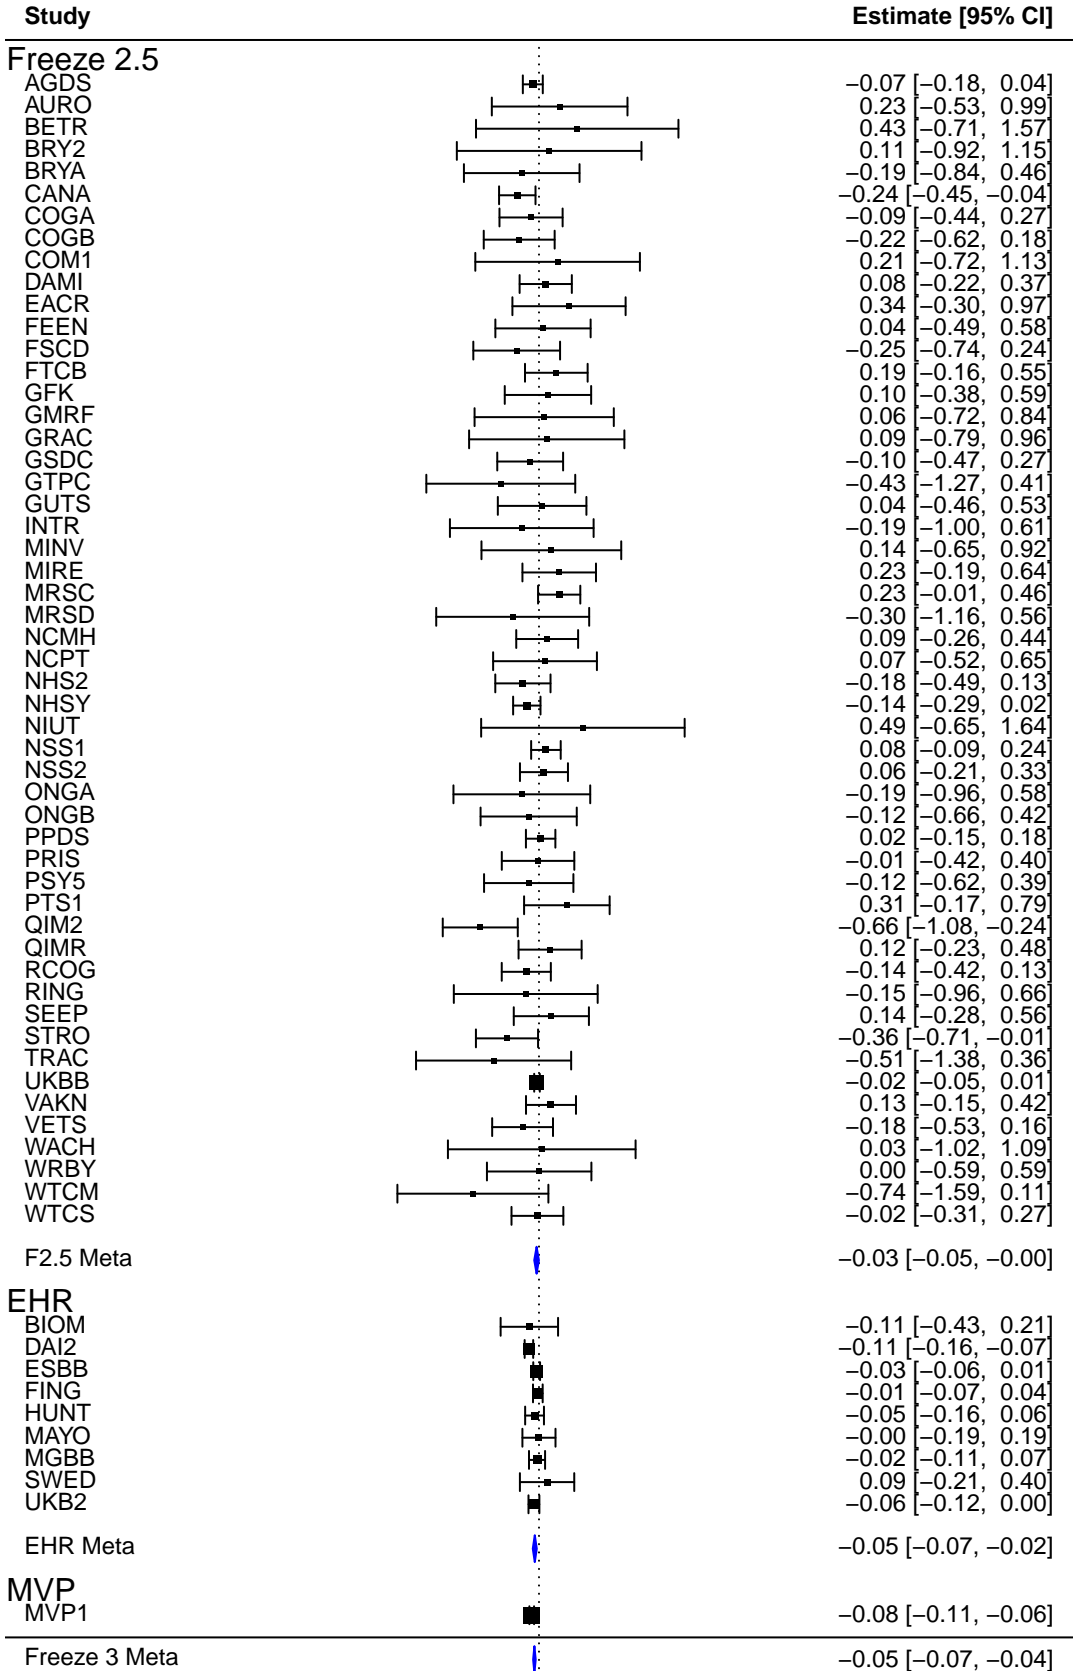

rs35791987 (Locus 35)

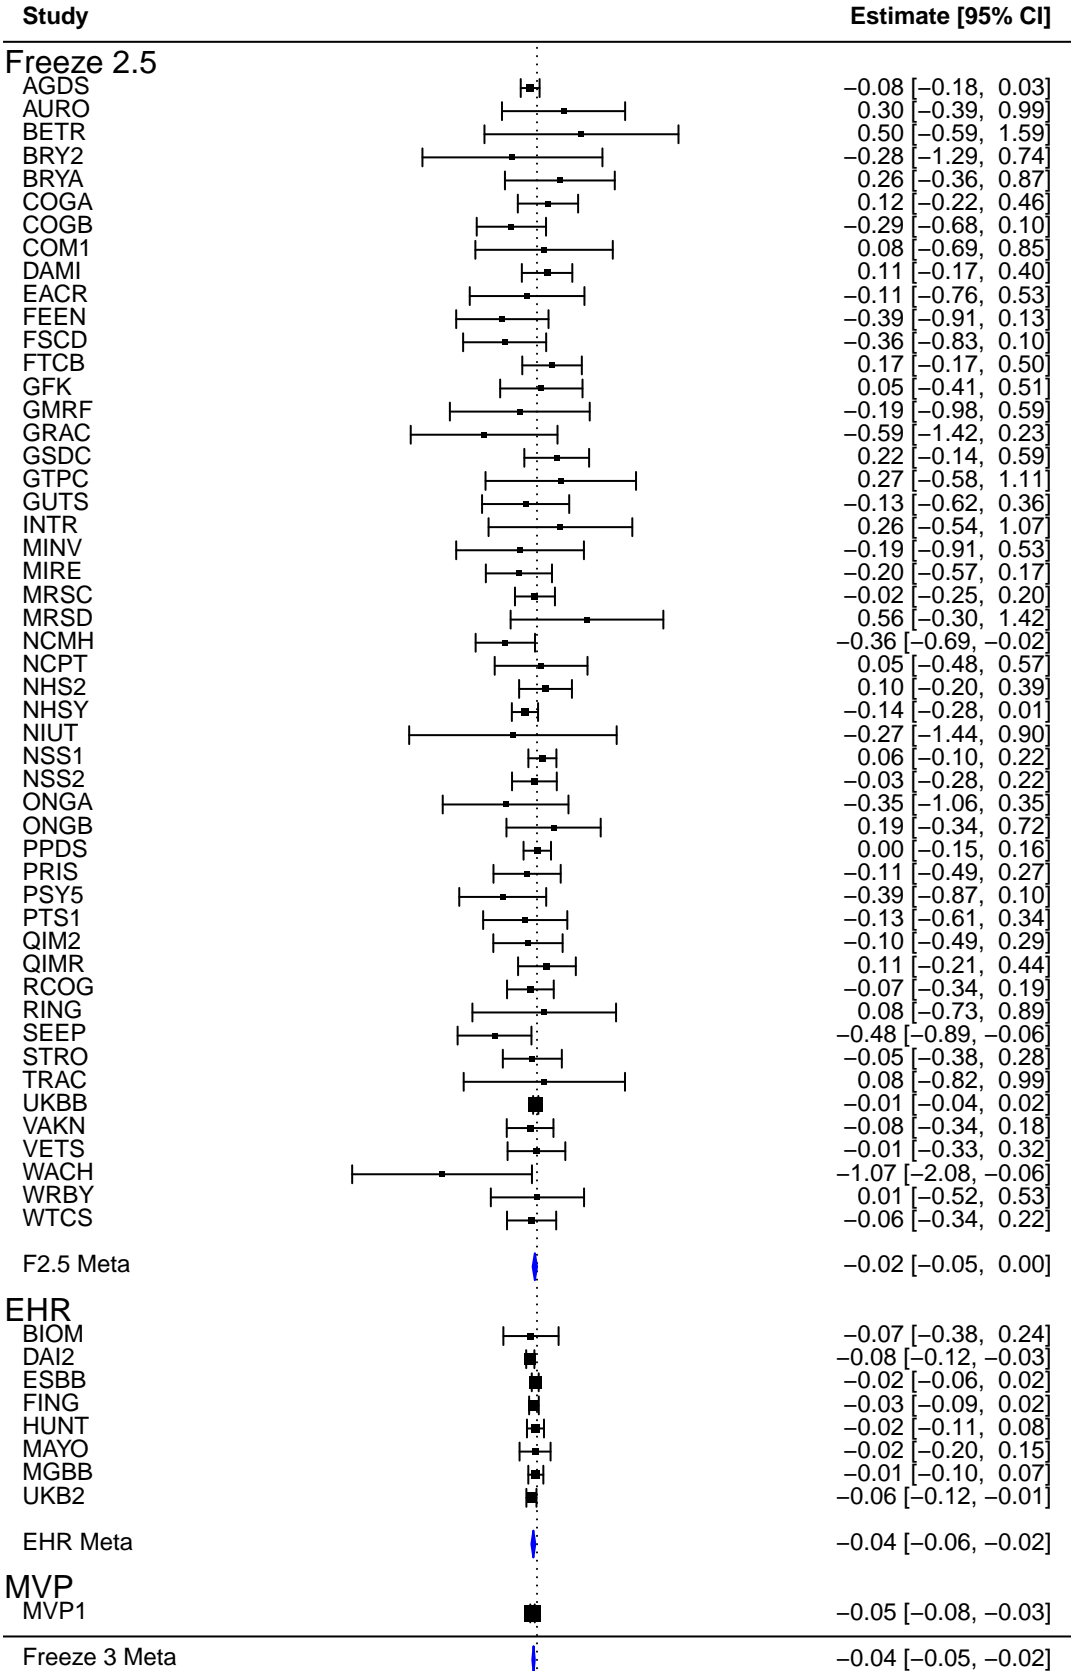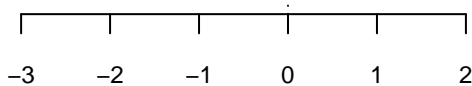

Observed Outcome

## rs13237518 (Locus 36)

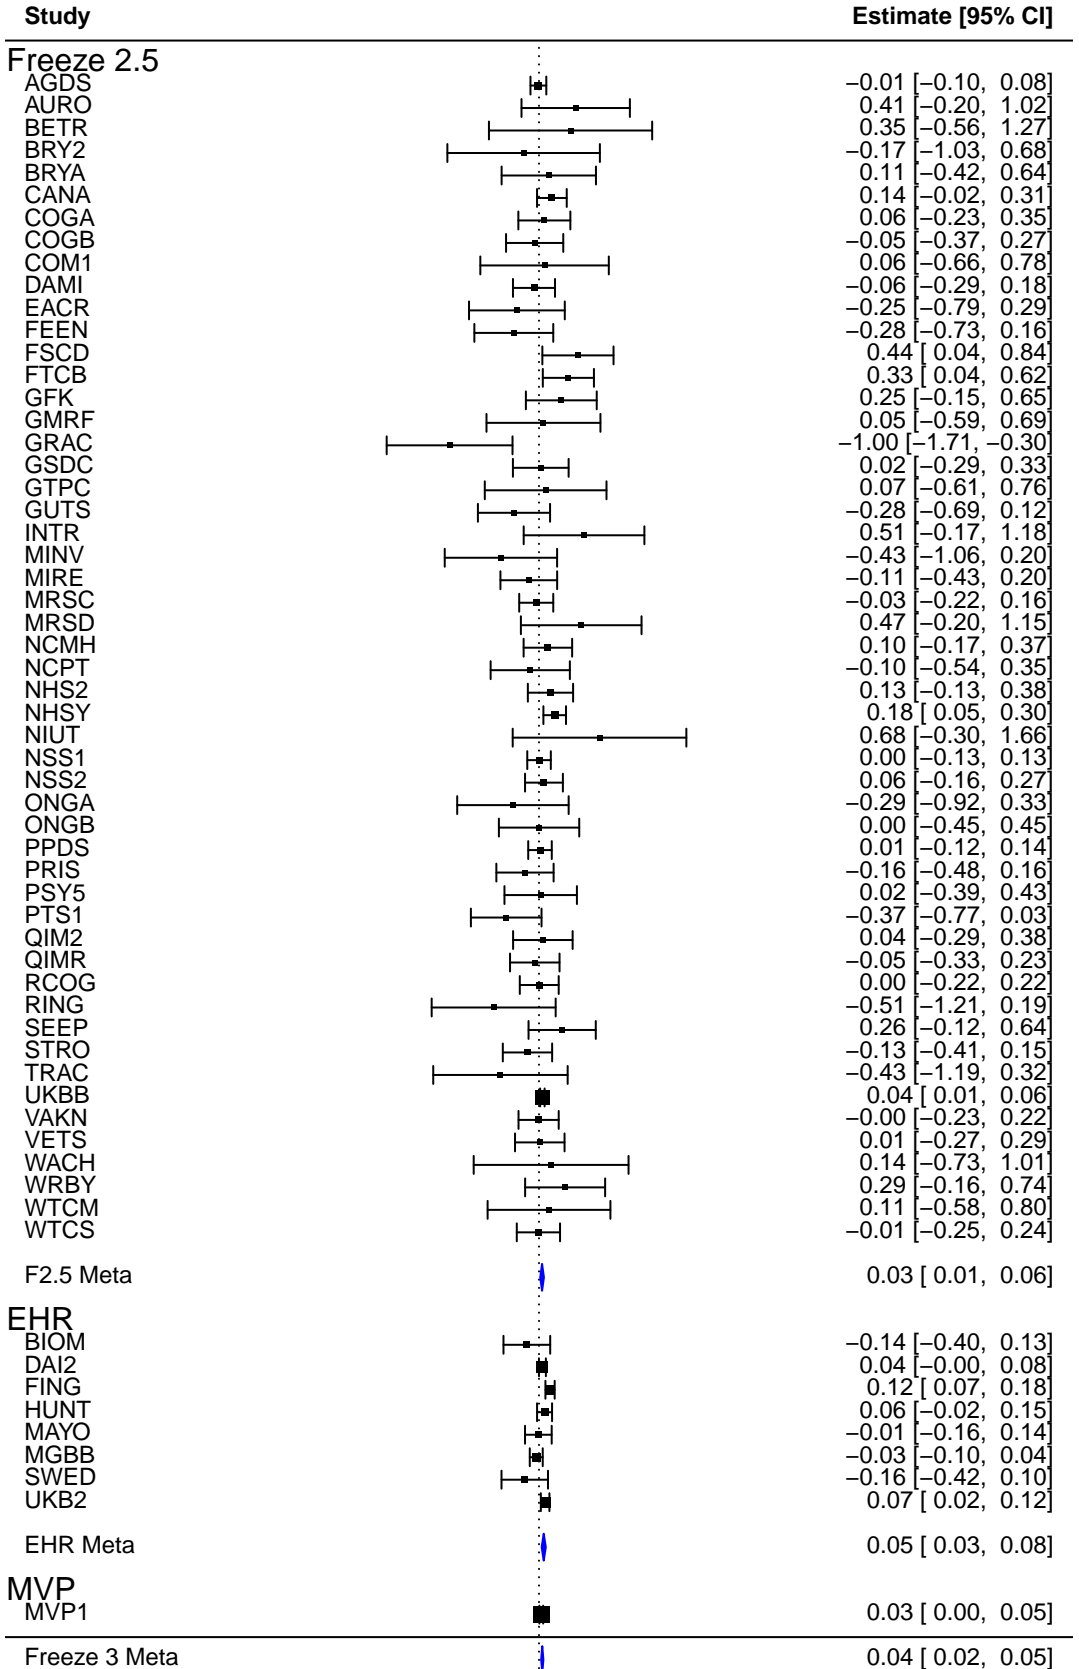

-2 -1 0 1 2

Observed Outcome

rs2107448 (Locus 37)

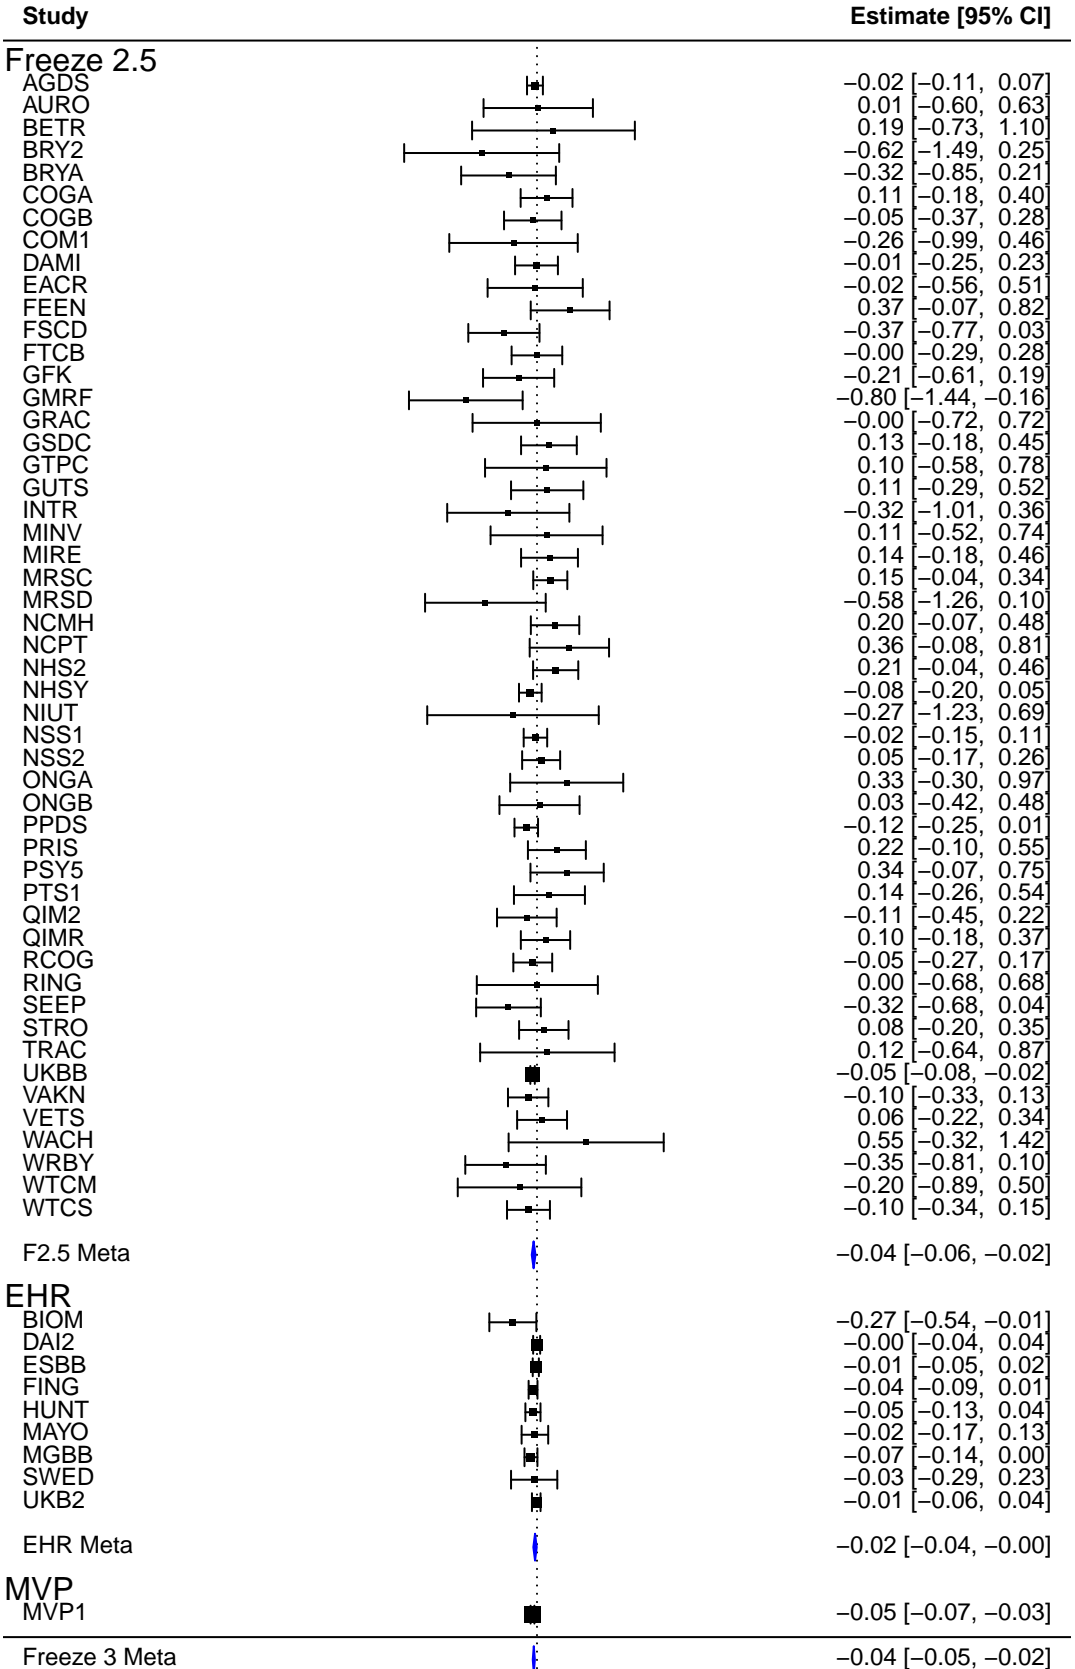

Observed Outcome

rs58043442 (Locus 38)

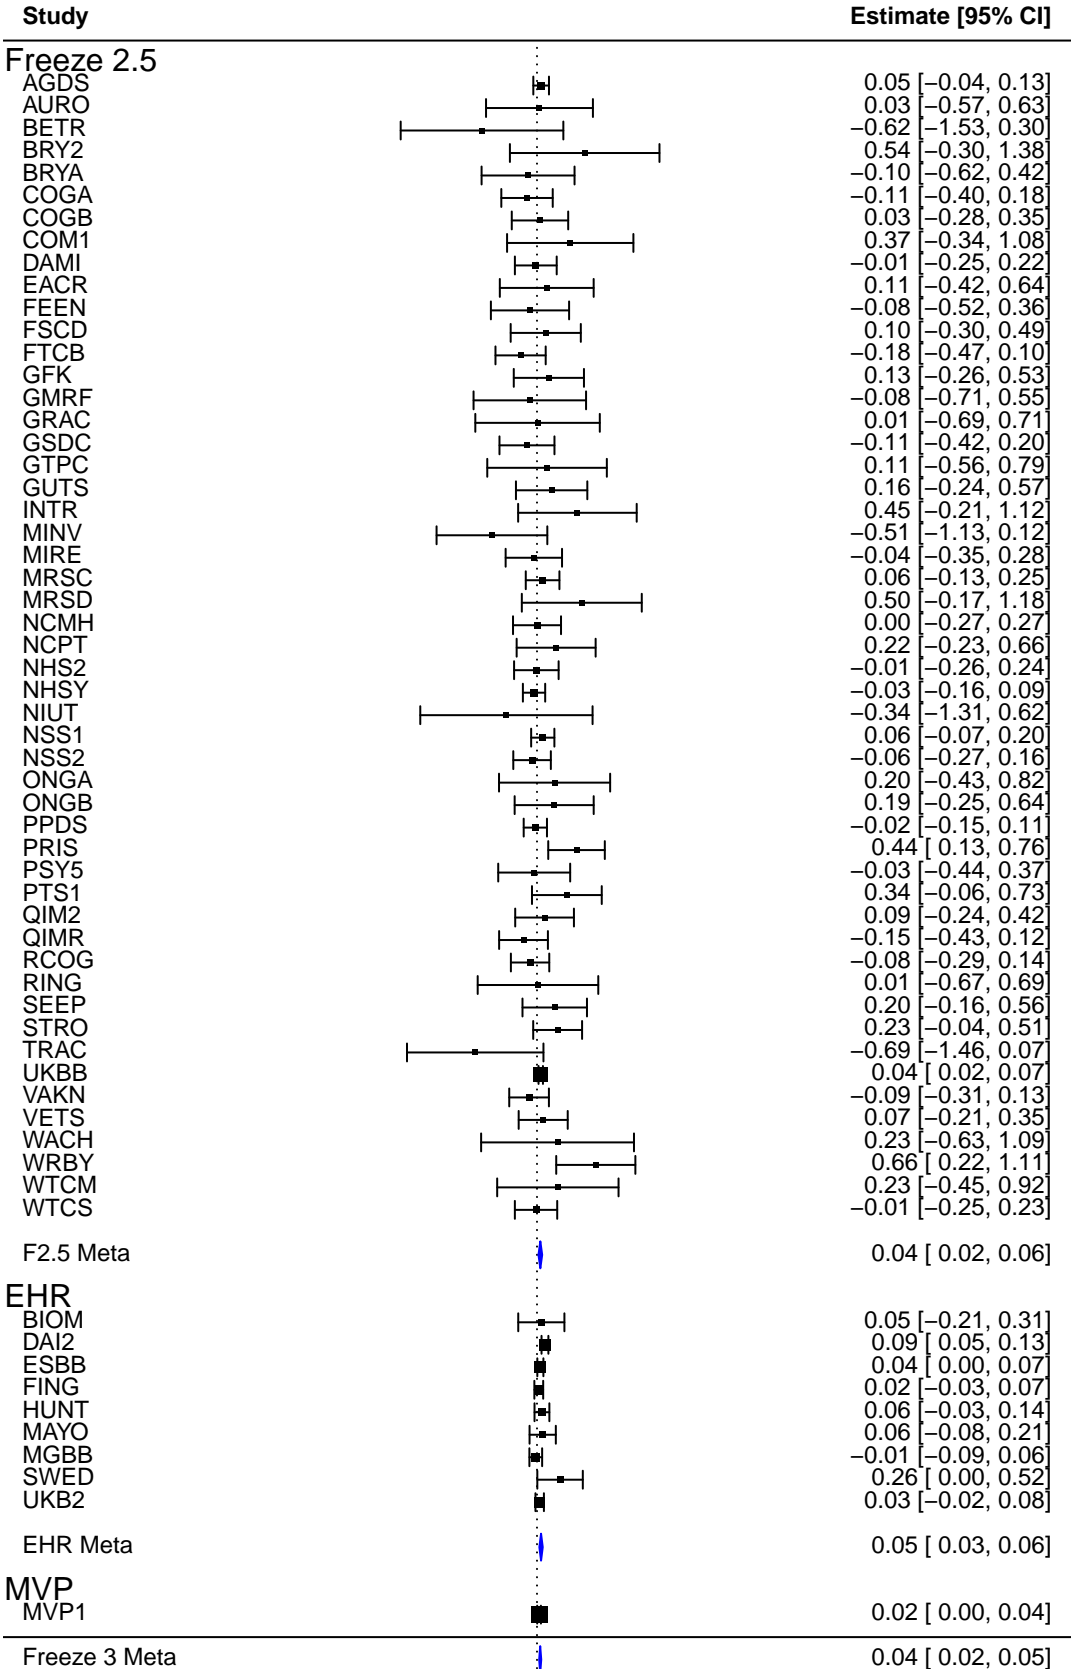

Observed Outcome

## rs2470937 (Locus 39)

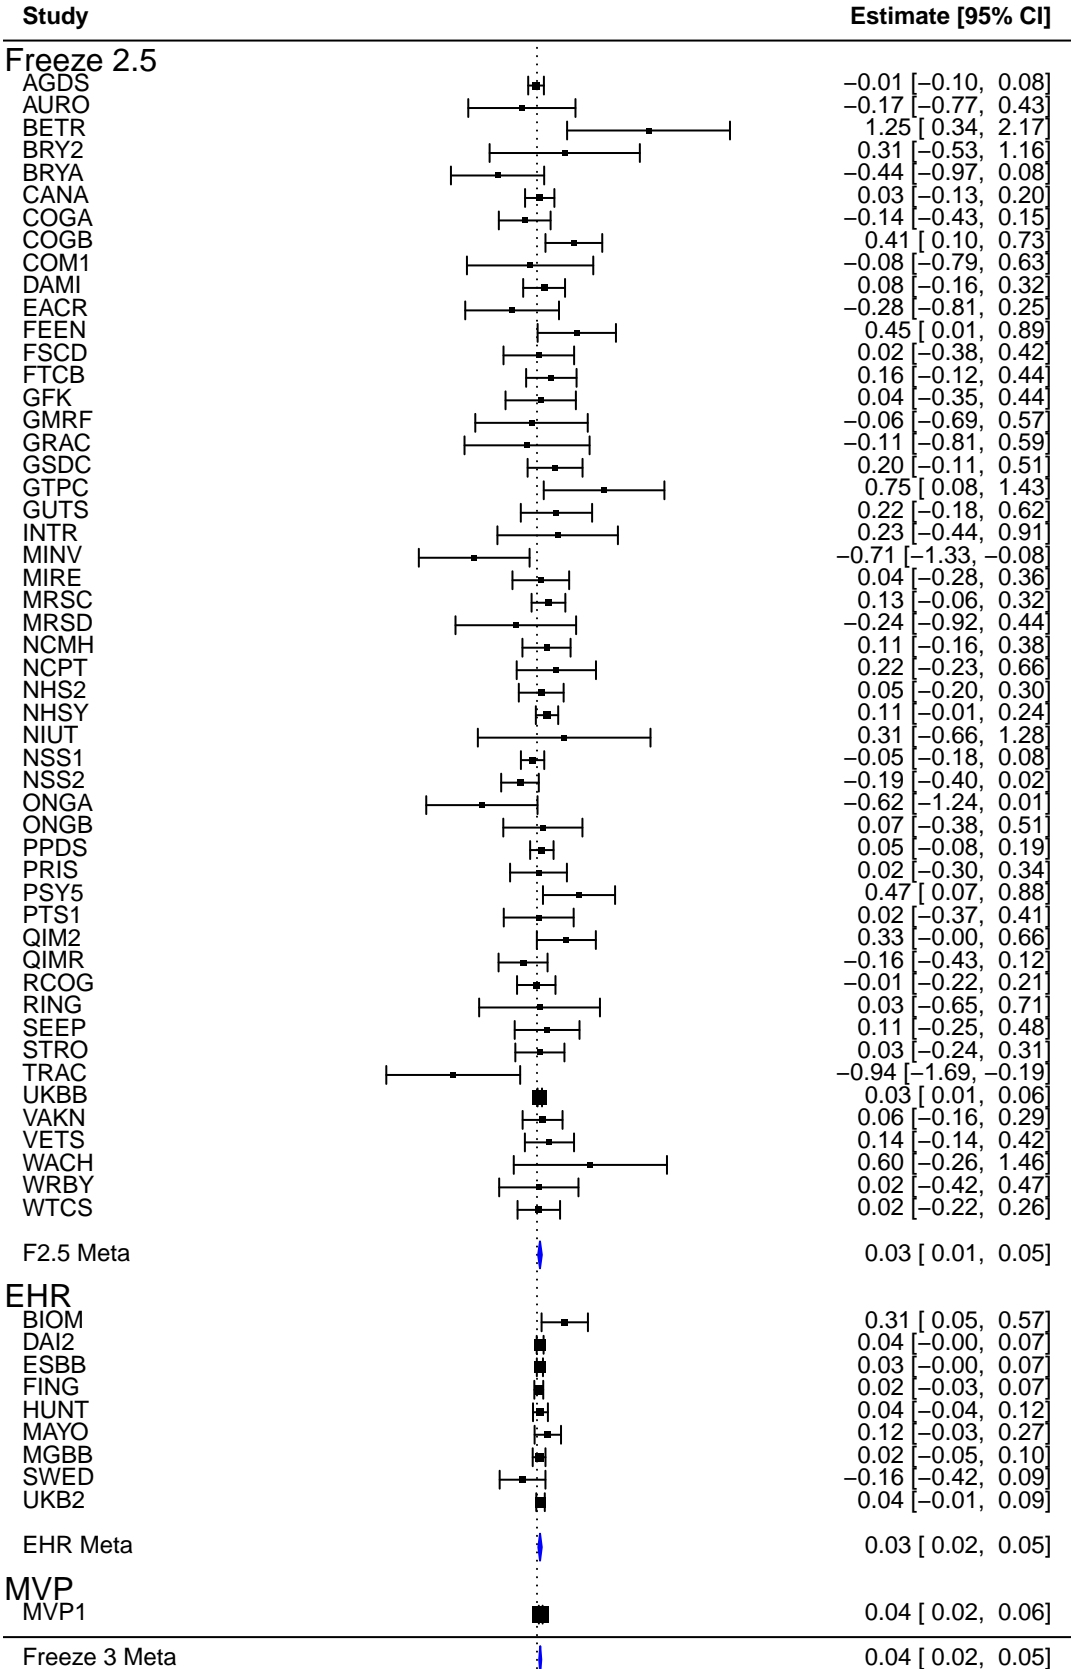

-2 -1 0 1 2 3

Observed Outcome



rs1476535 (Locus 40)

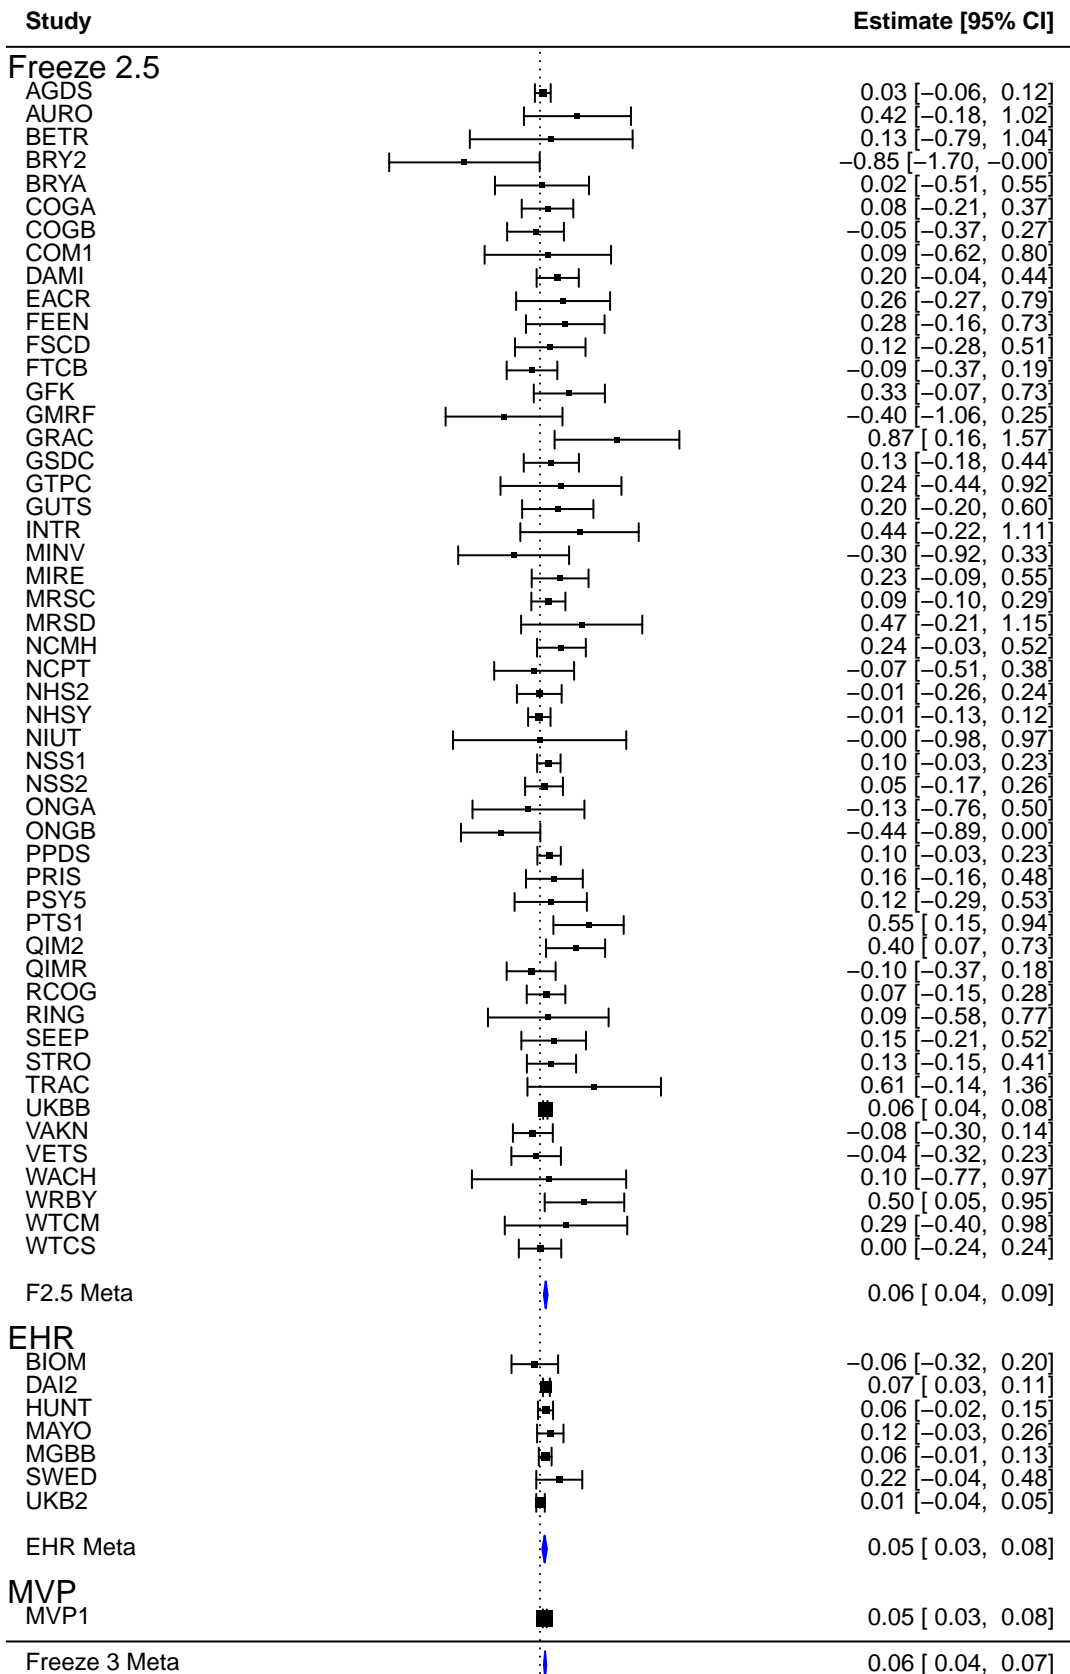

Observed Outcome

rs7806900 (Locus 41)

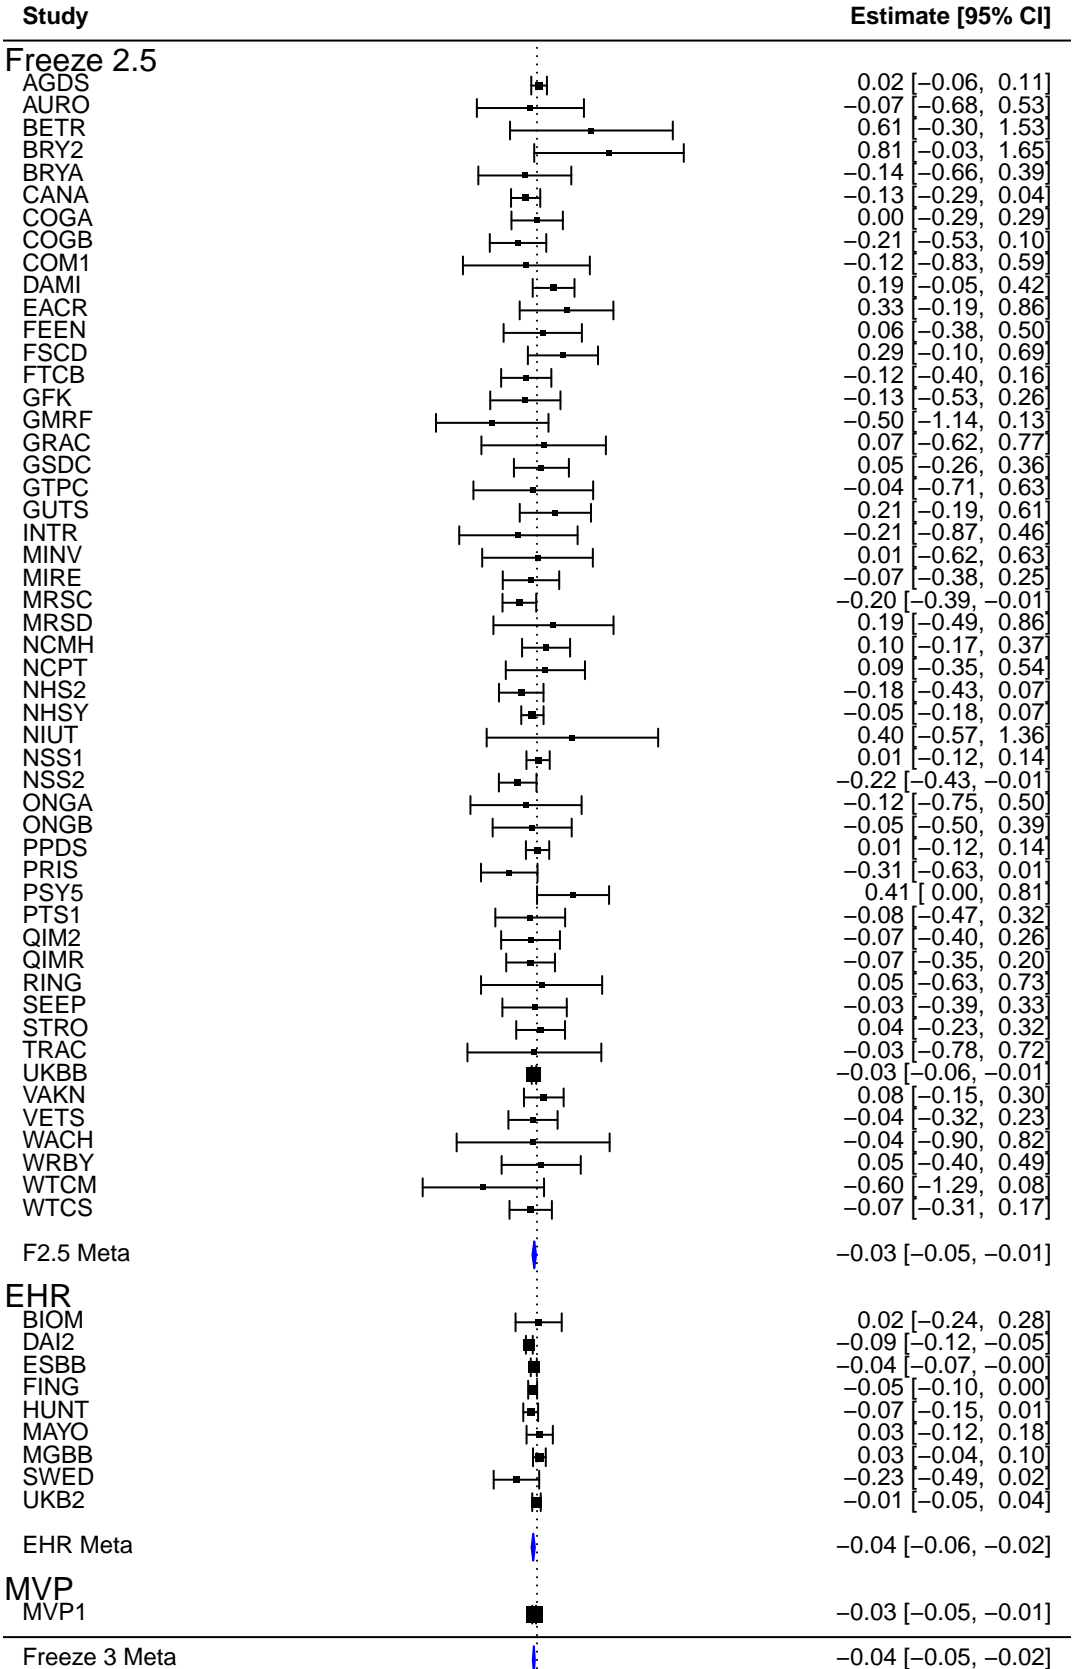

Observed Outcome

## rs61702433 (Locus 42)

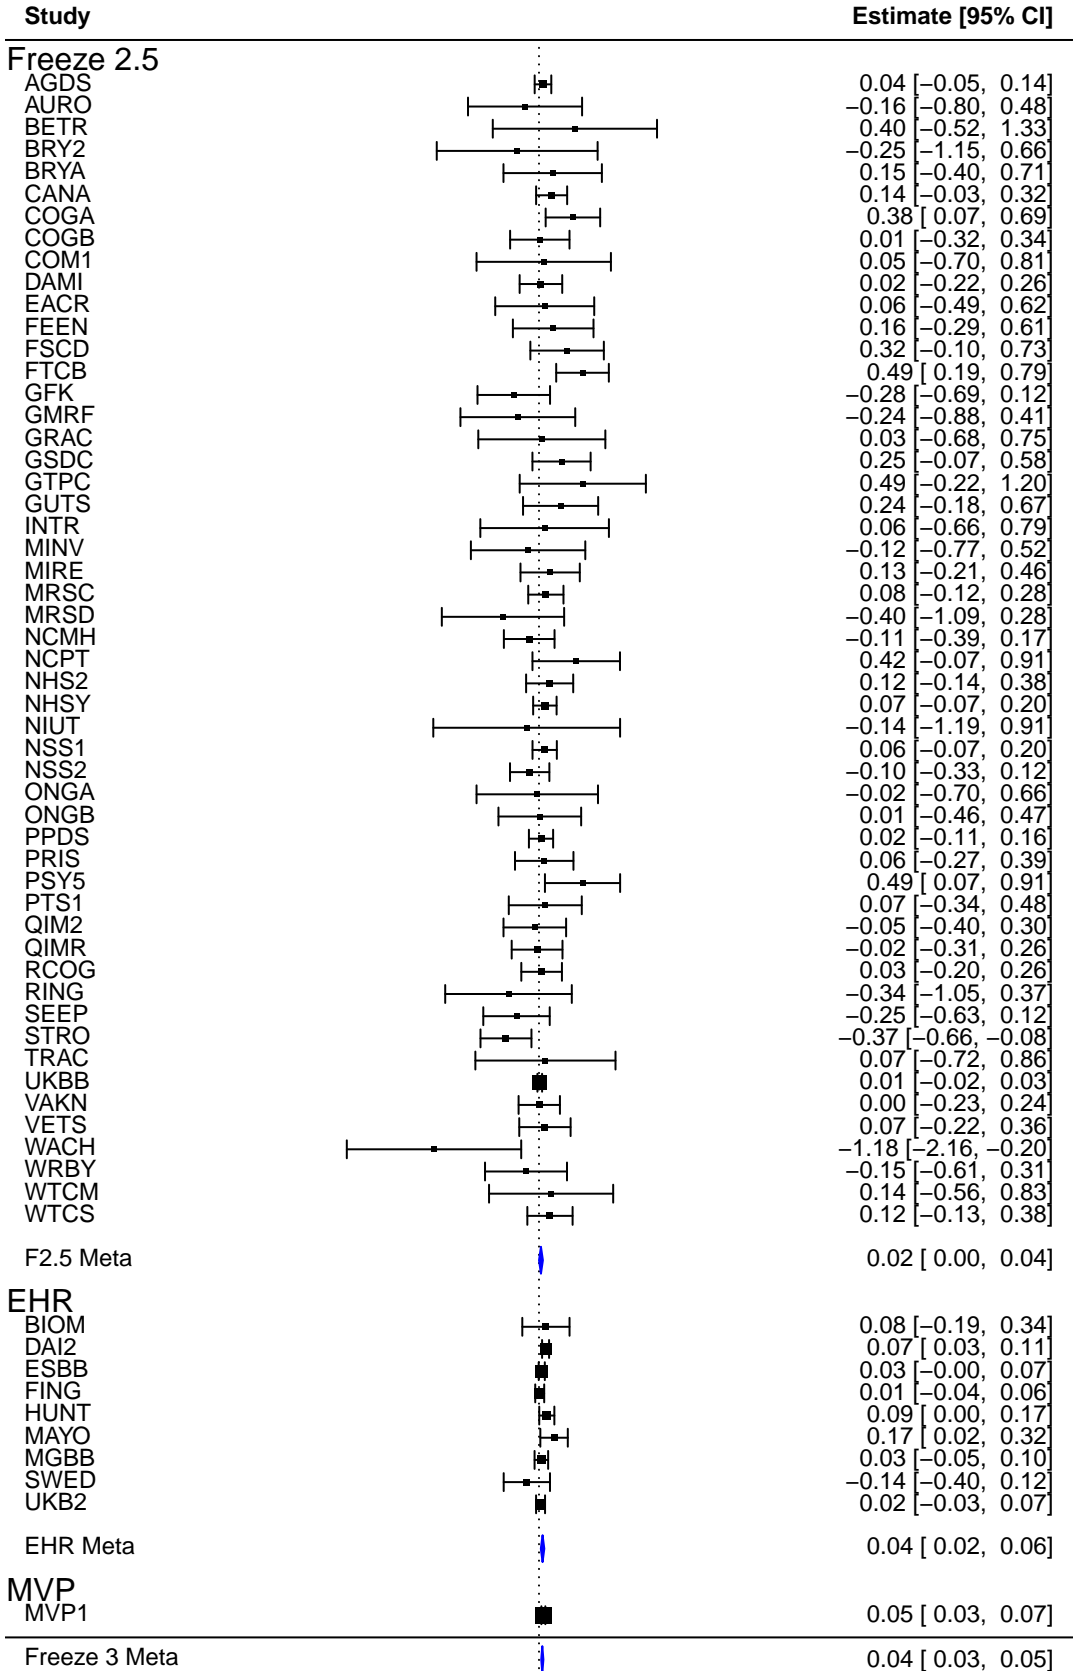

## rs10487459 (Locus 43)

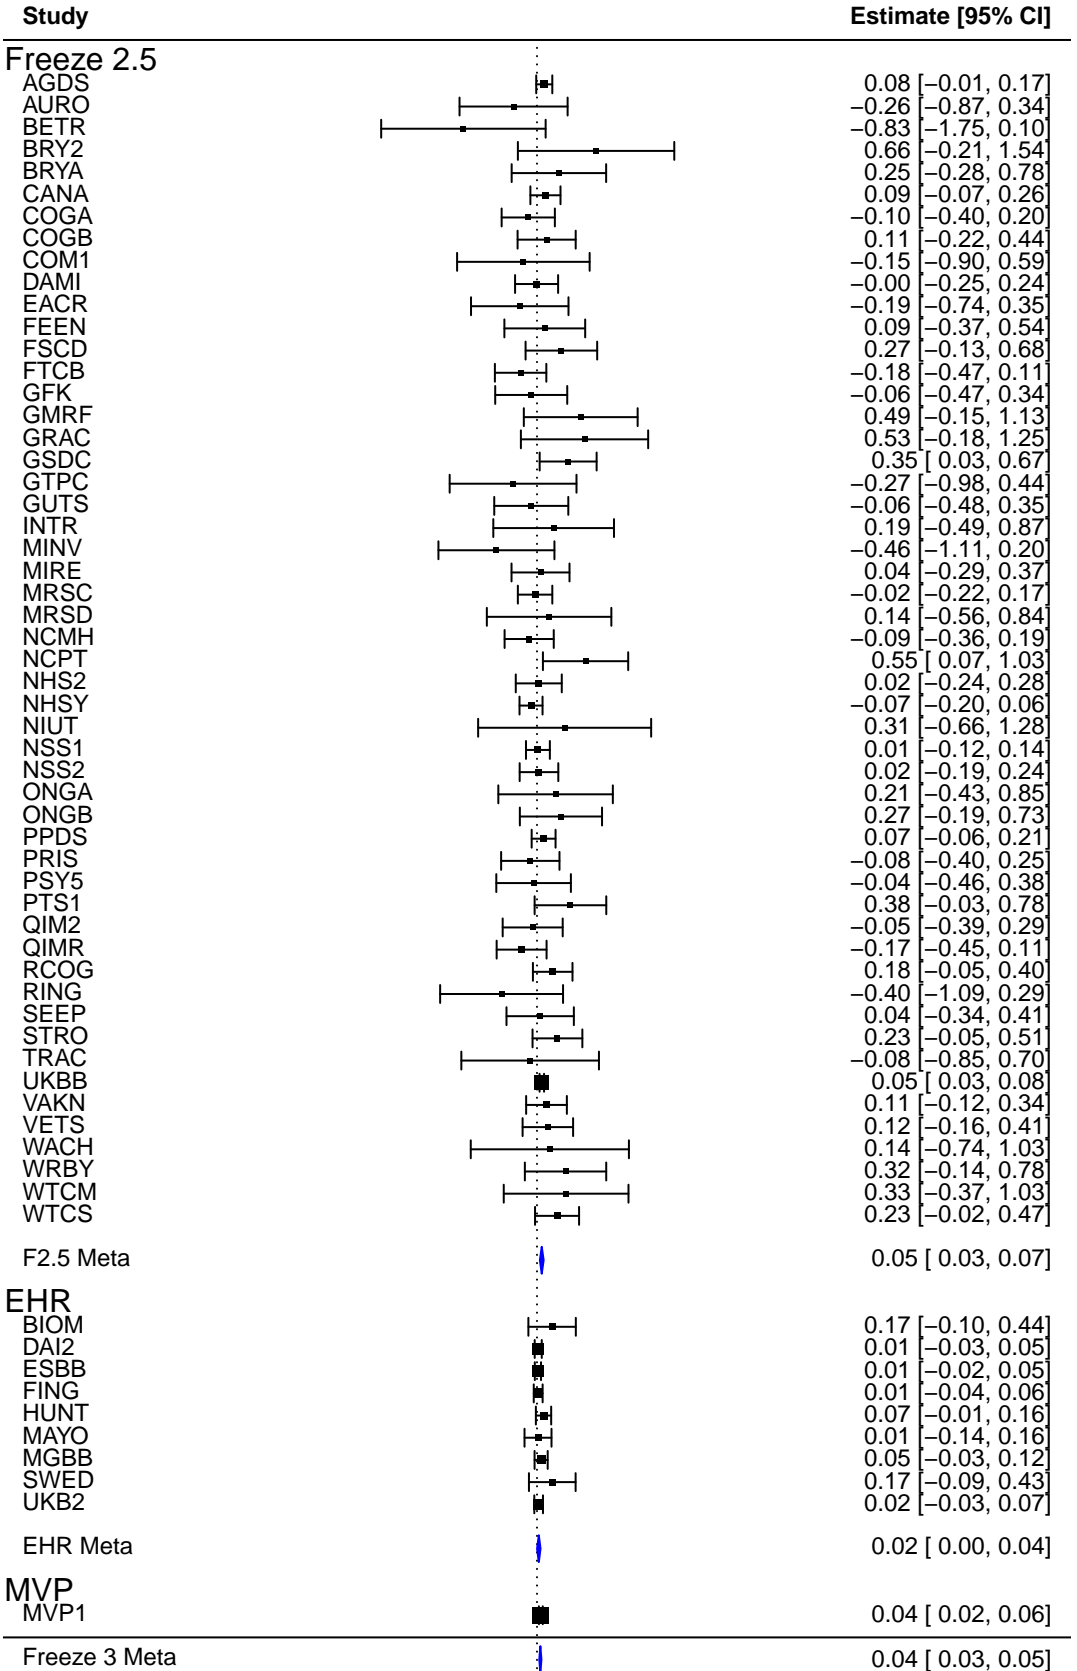

rs10104247 (Locus 44)

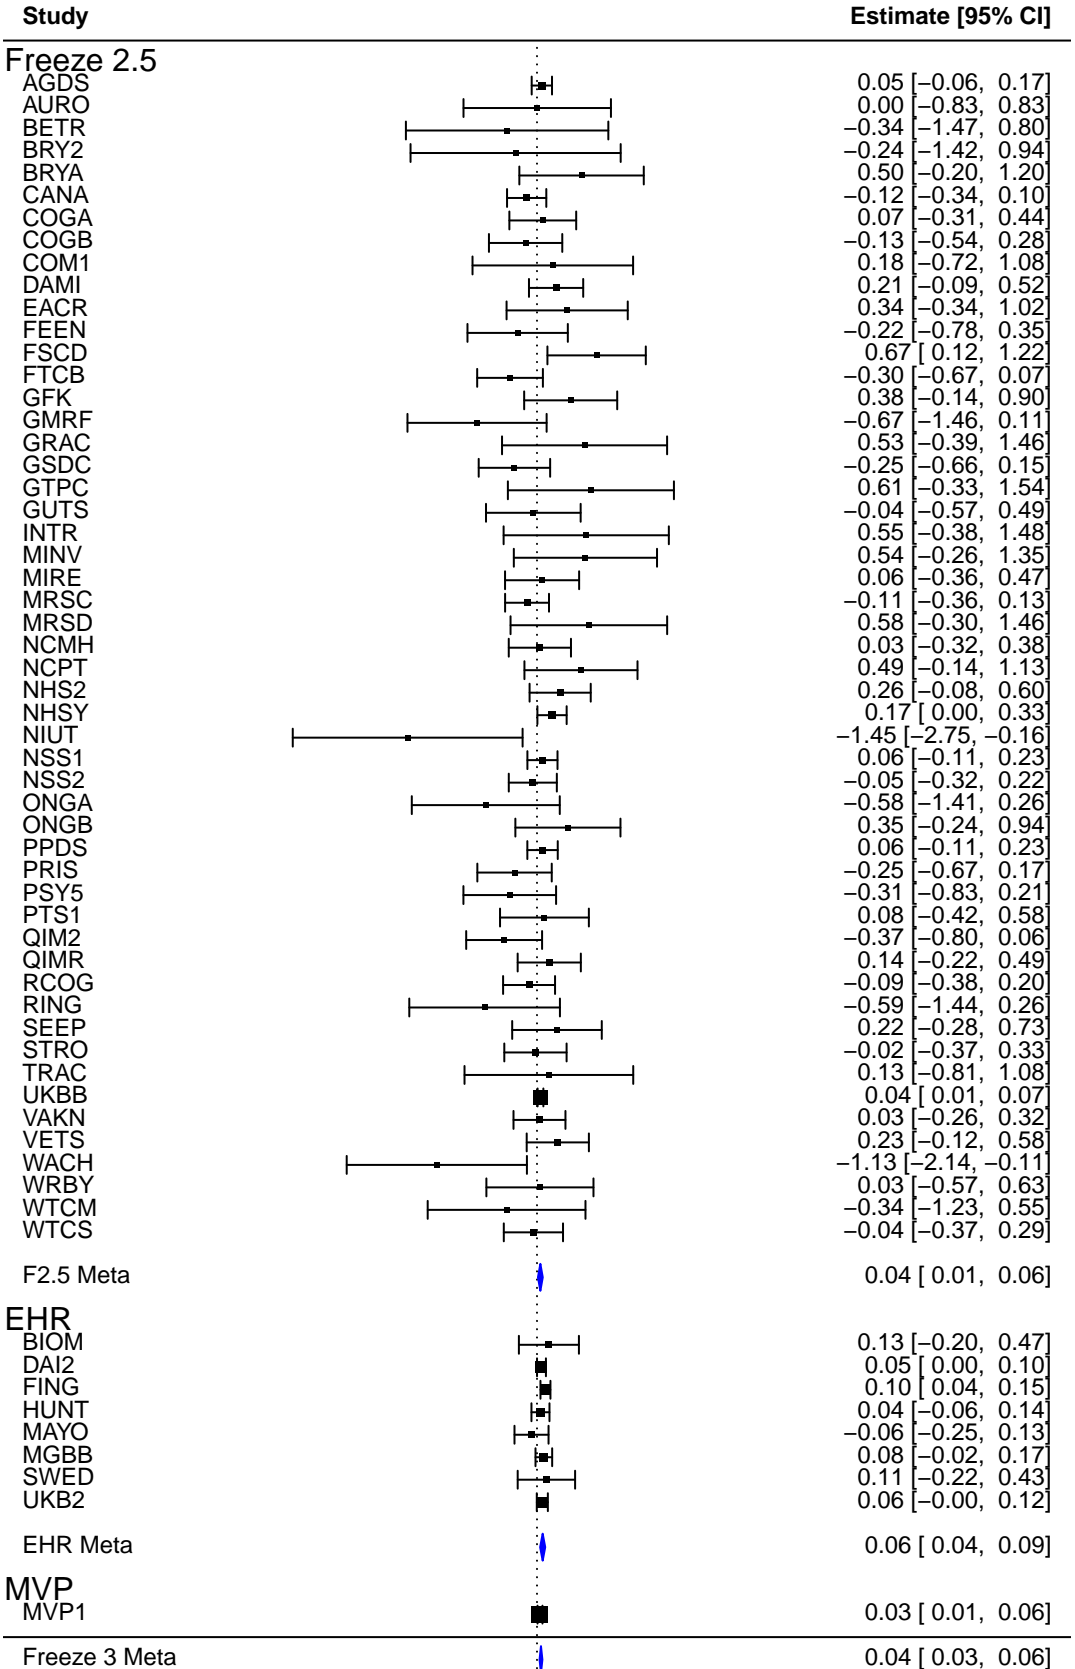

## rs4129585 (Locus 45)

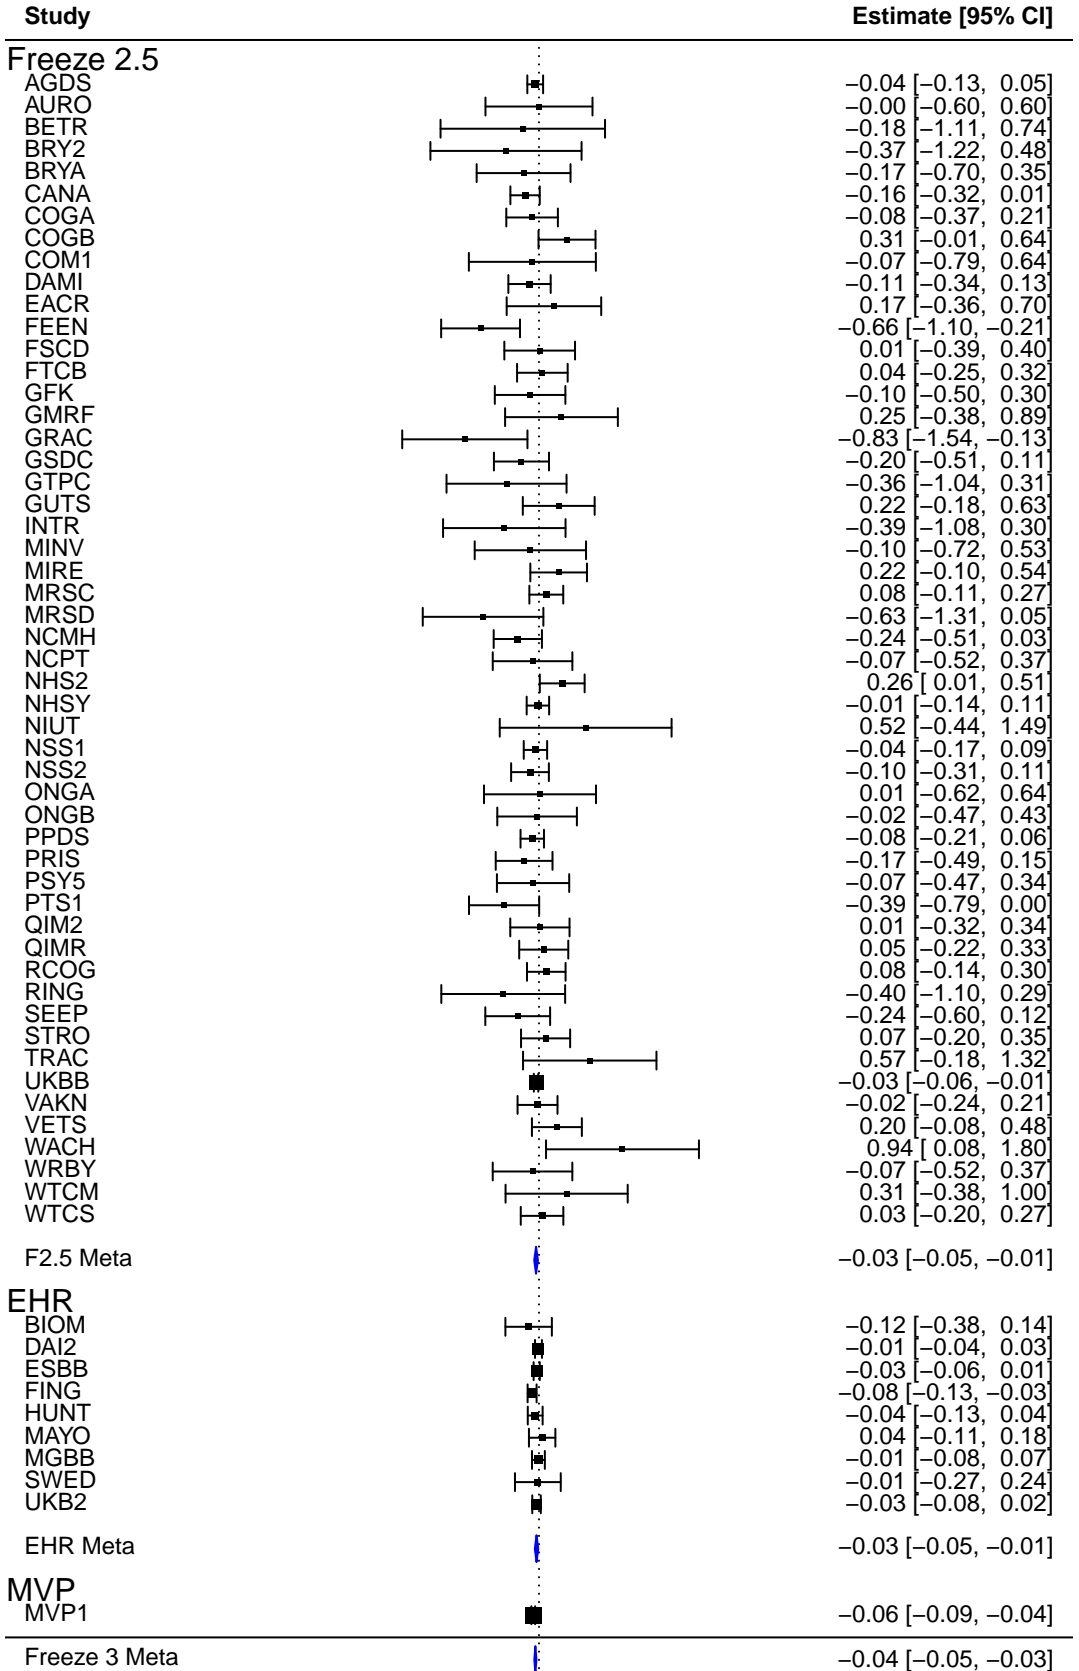

-2 -1 0 1 2

Observed Outcome

rs13290462 (Locus 46)

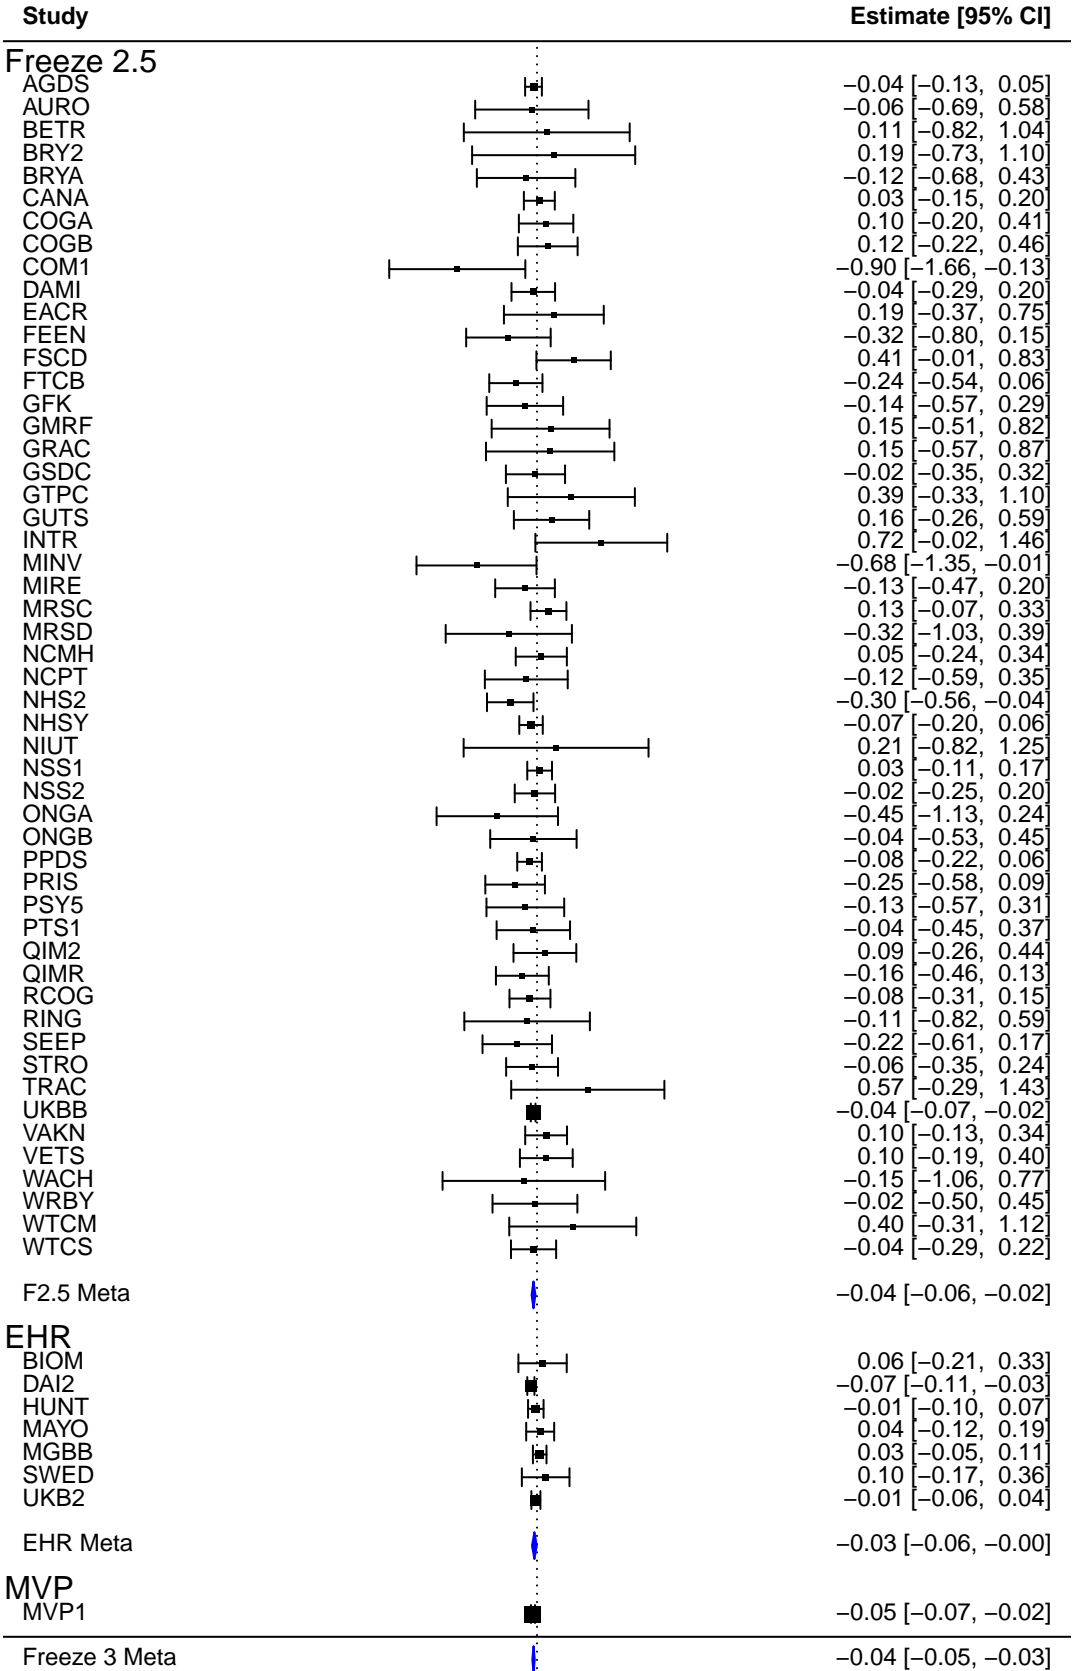

rs10992779 (Locus 47)

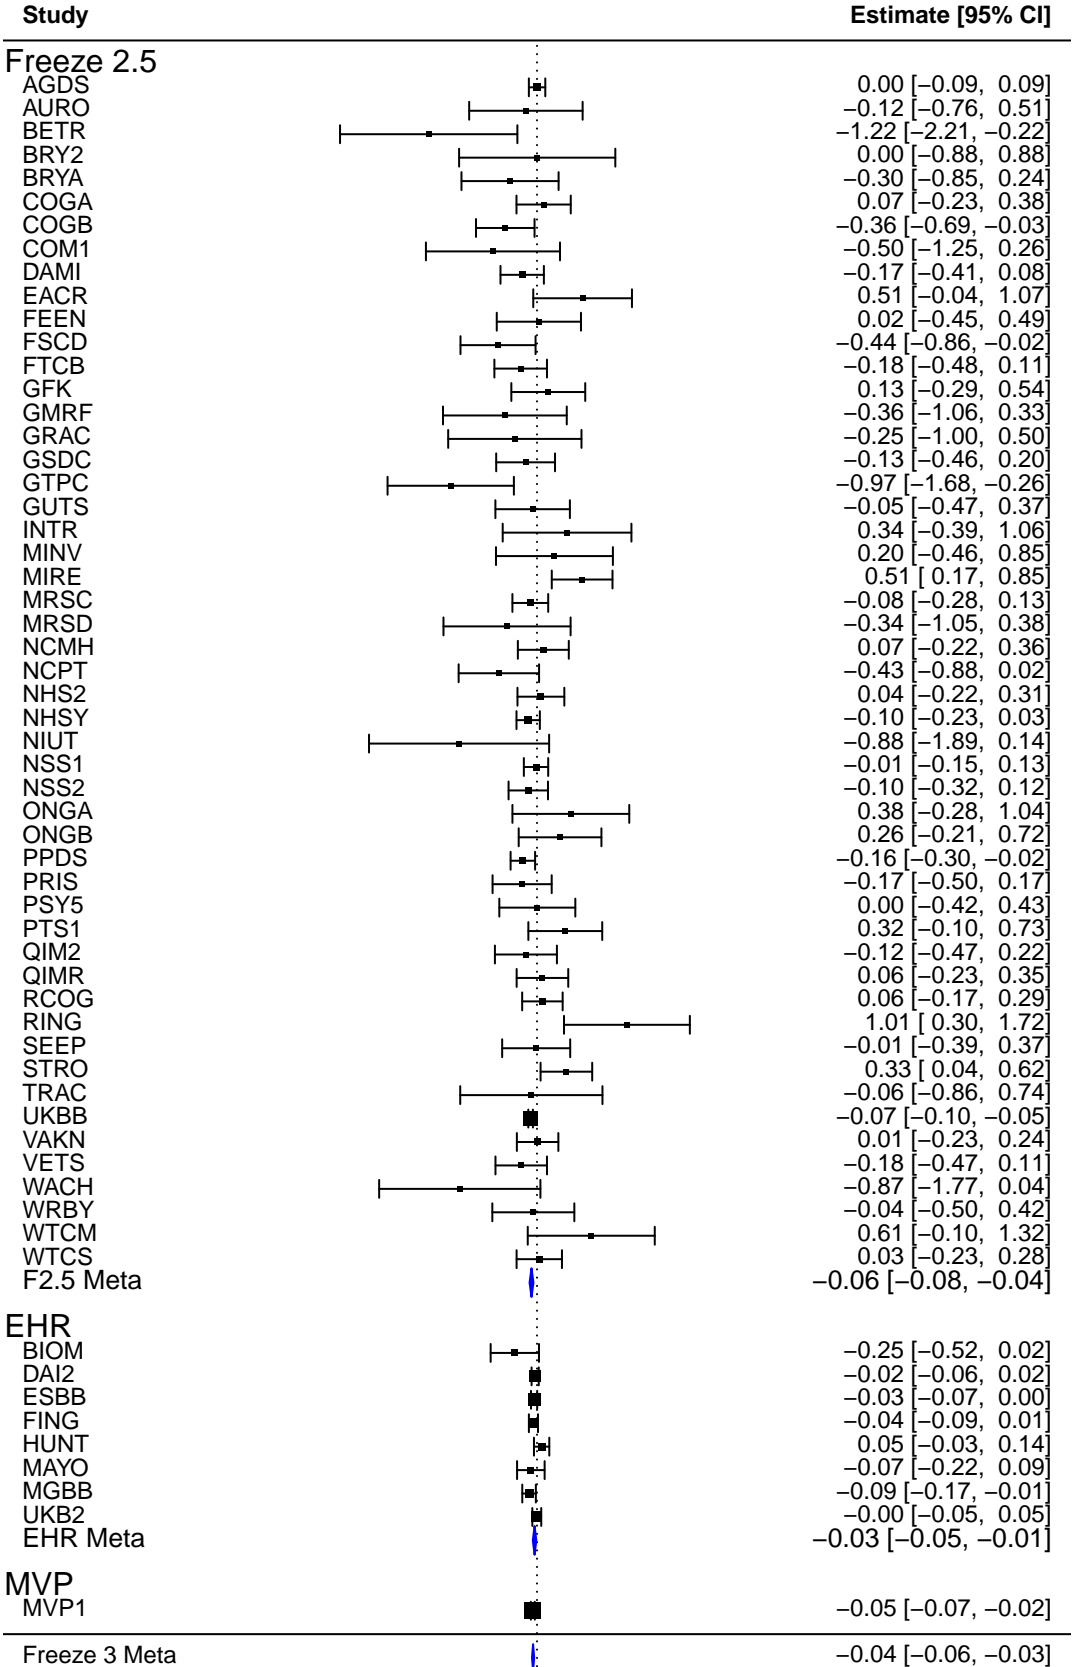



## rs67736073 (Locus 48)

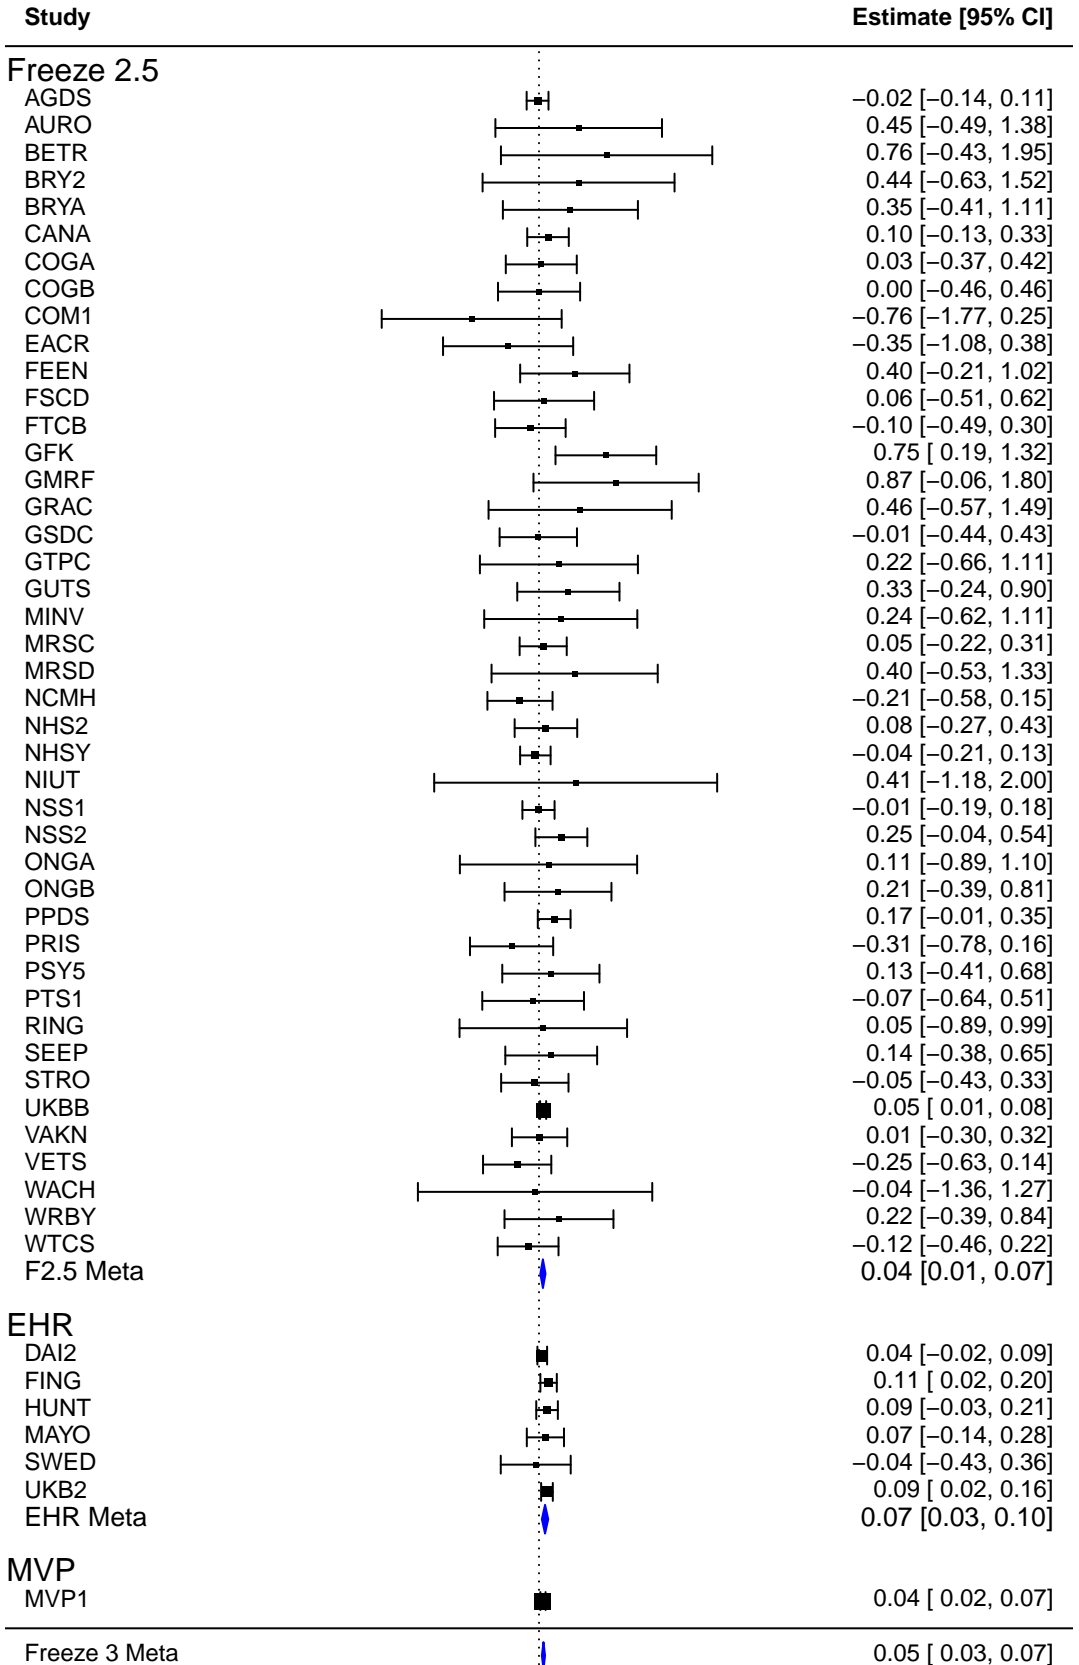

-2 -1 0 1 2 3

Observed Outcome

rs1124372 (Locus 49)

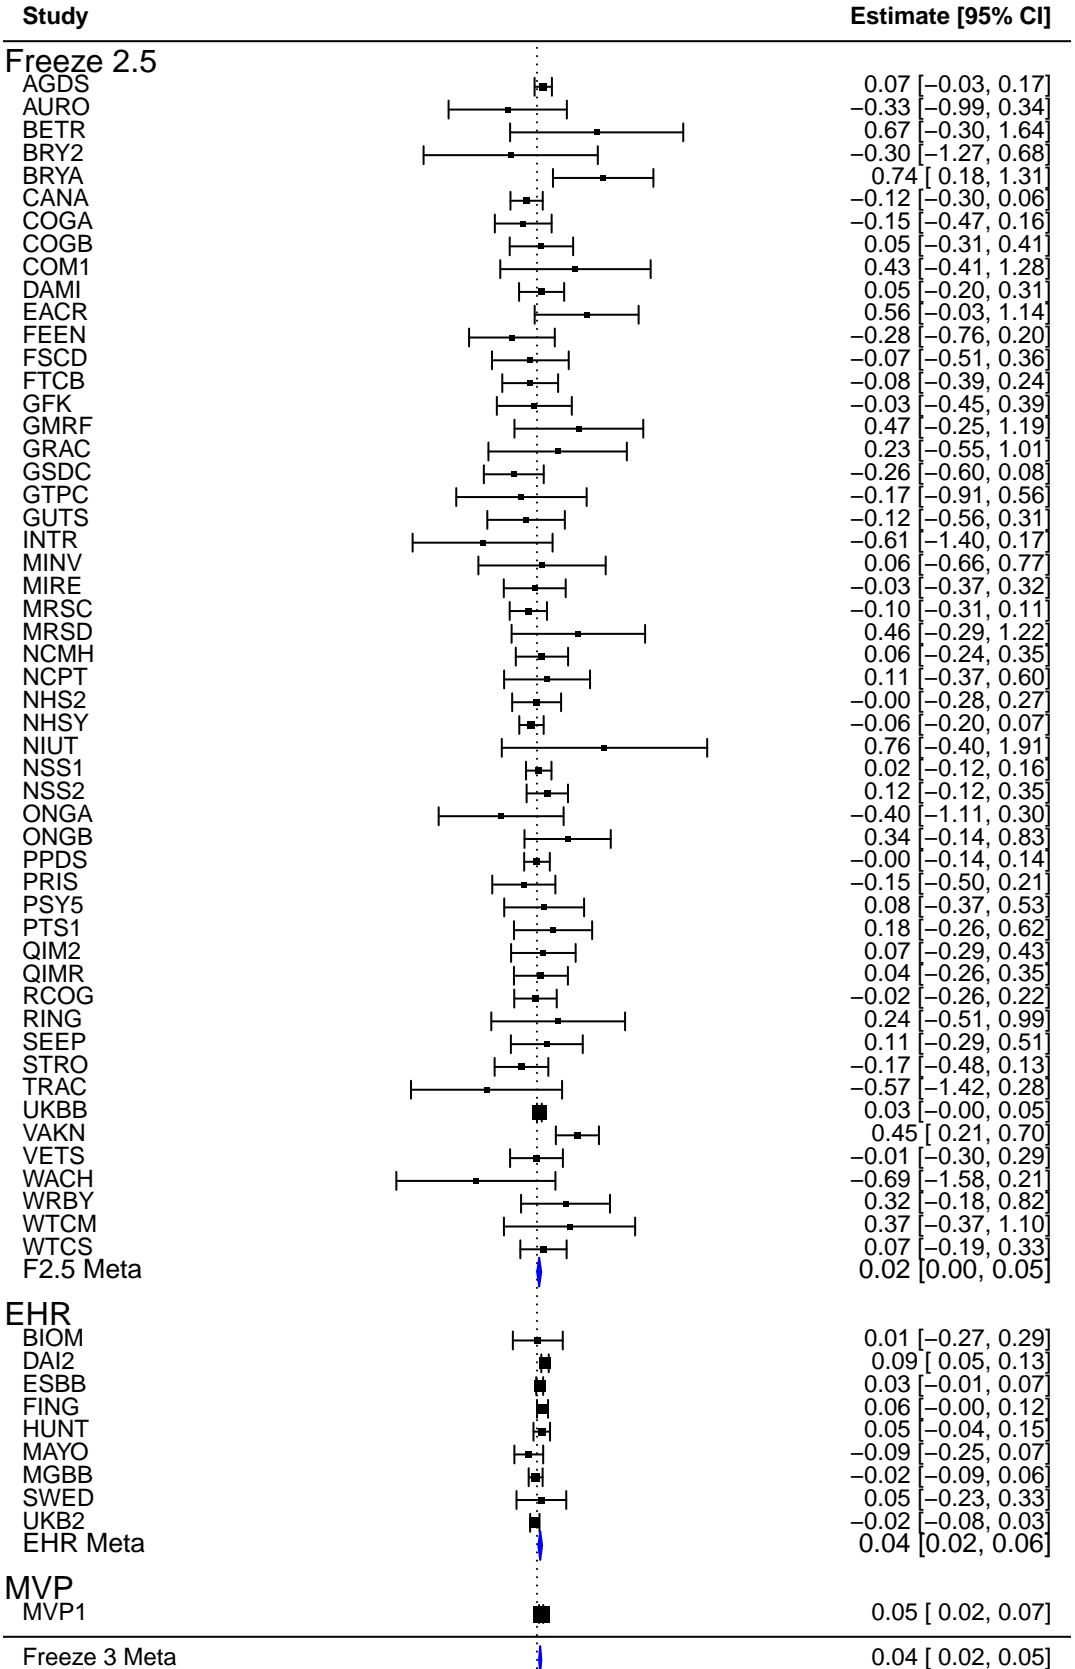

Observed Outcome

rs7914674 (Locus 50)

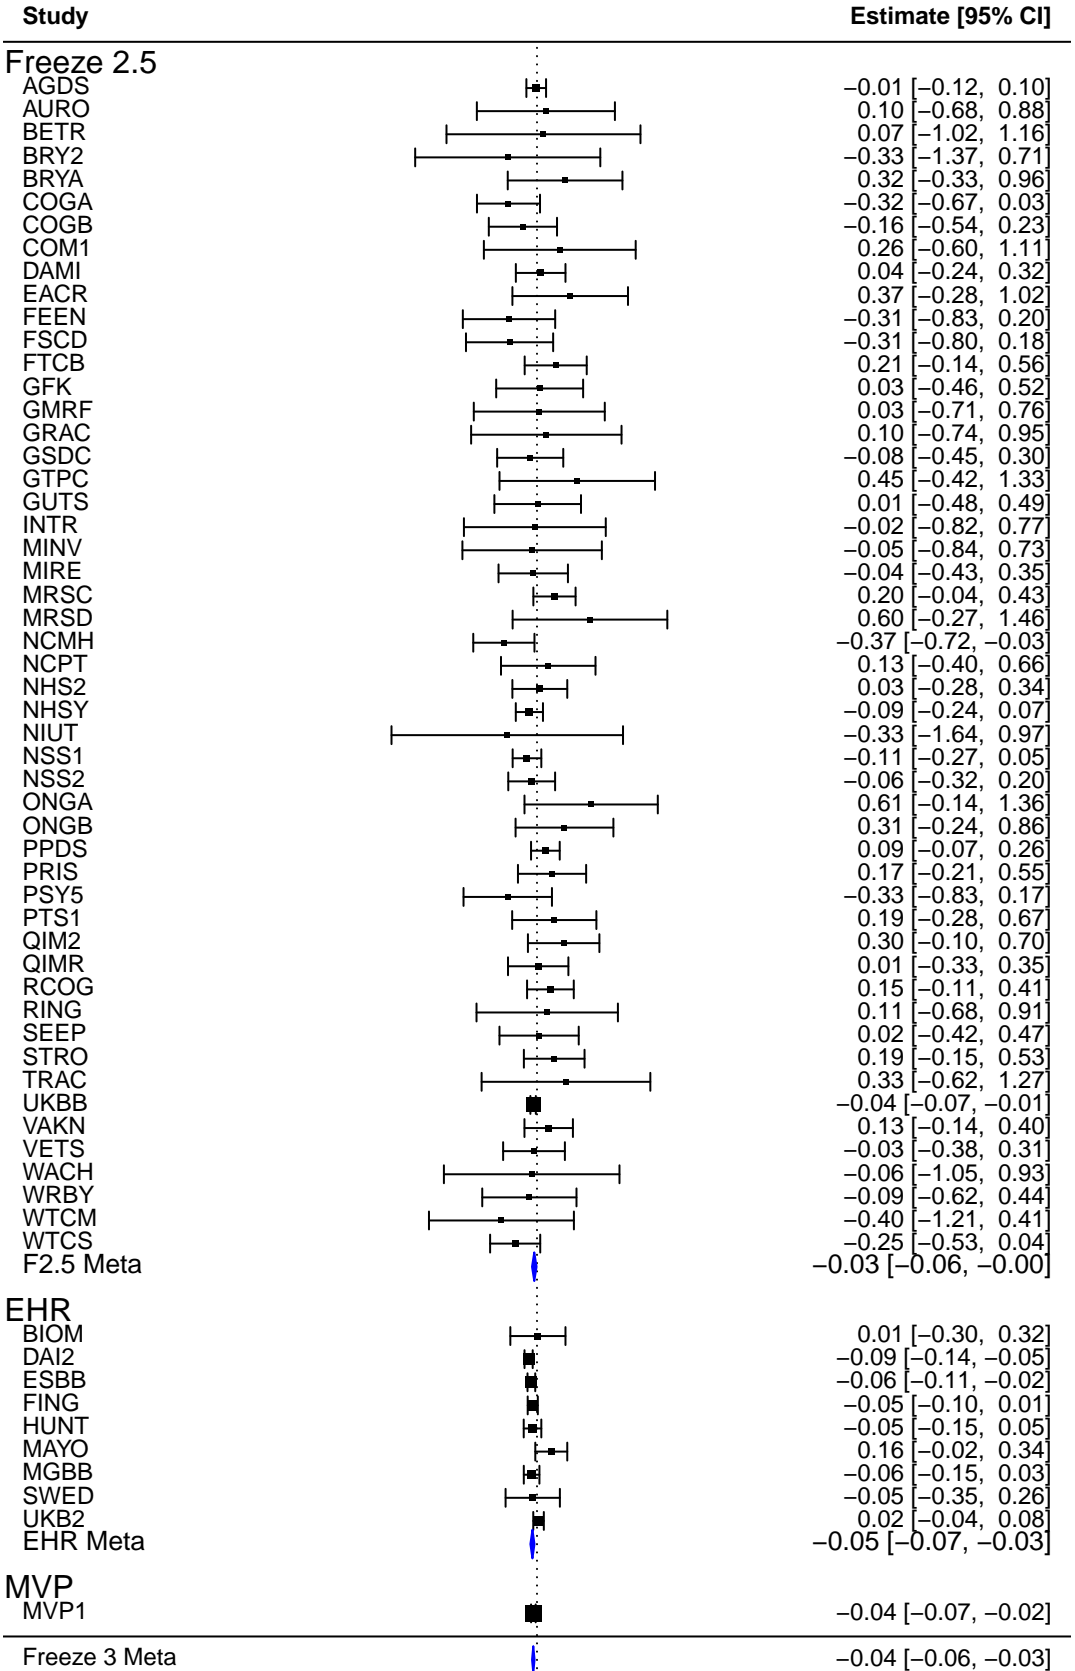

Observed Outcome

rs11529859 (Locus 51)

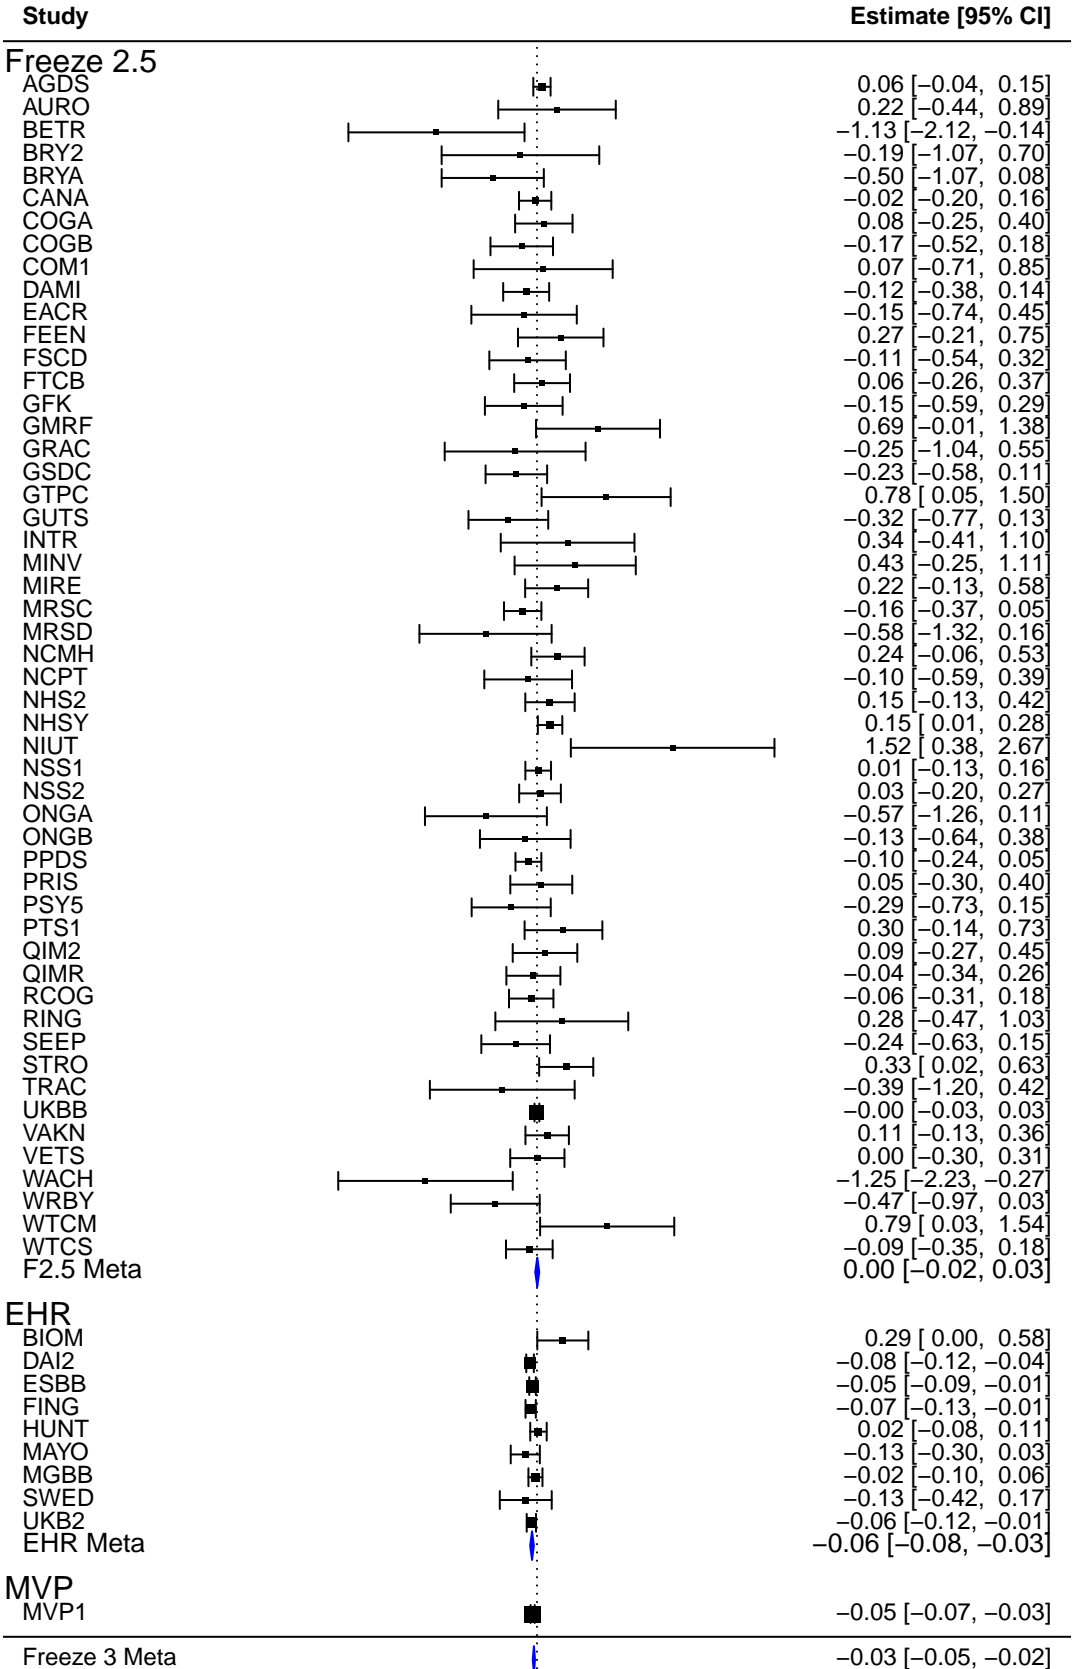

## rs488769 (Locus 52)

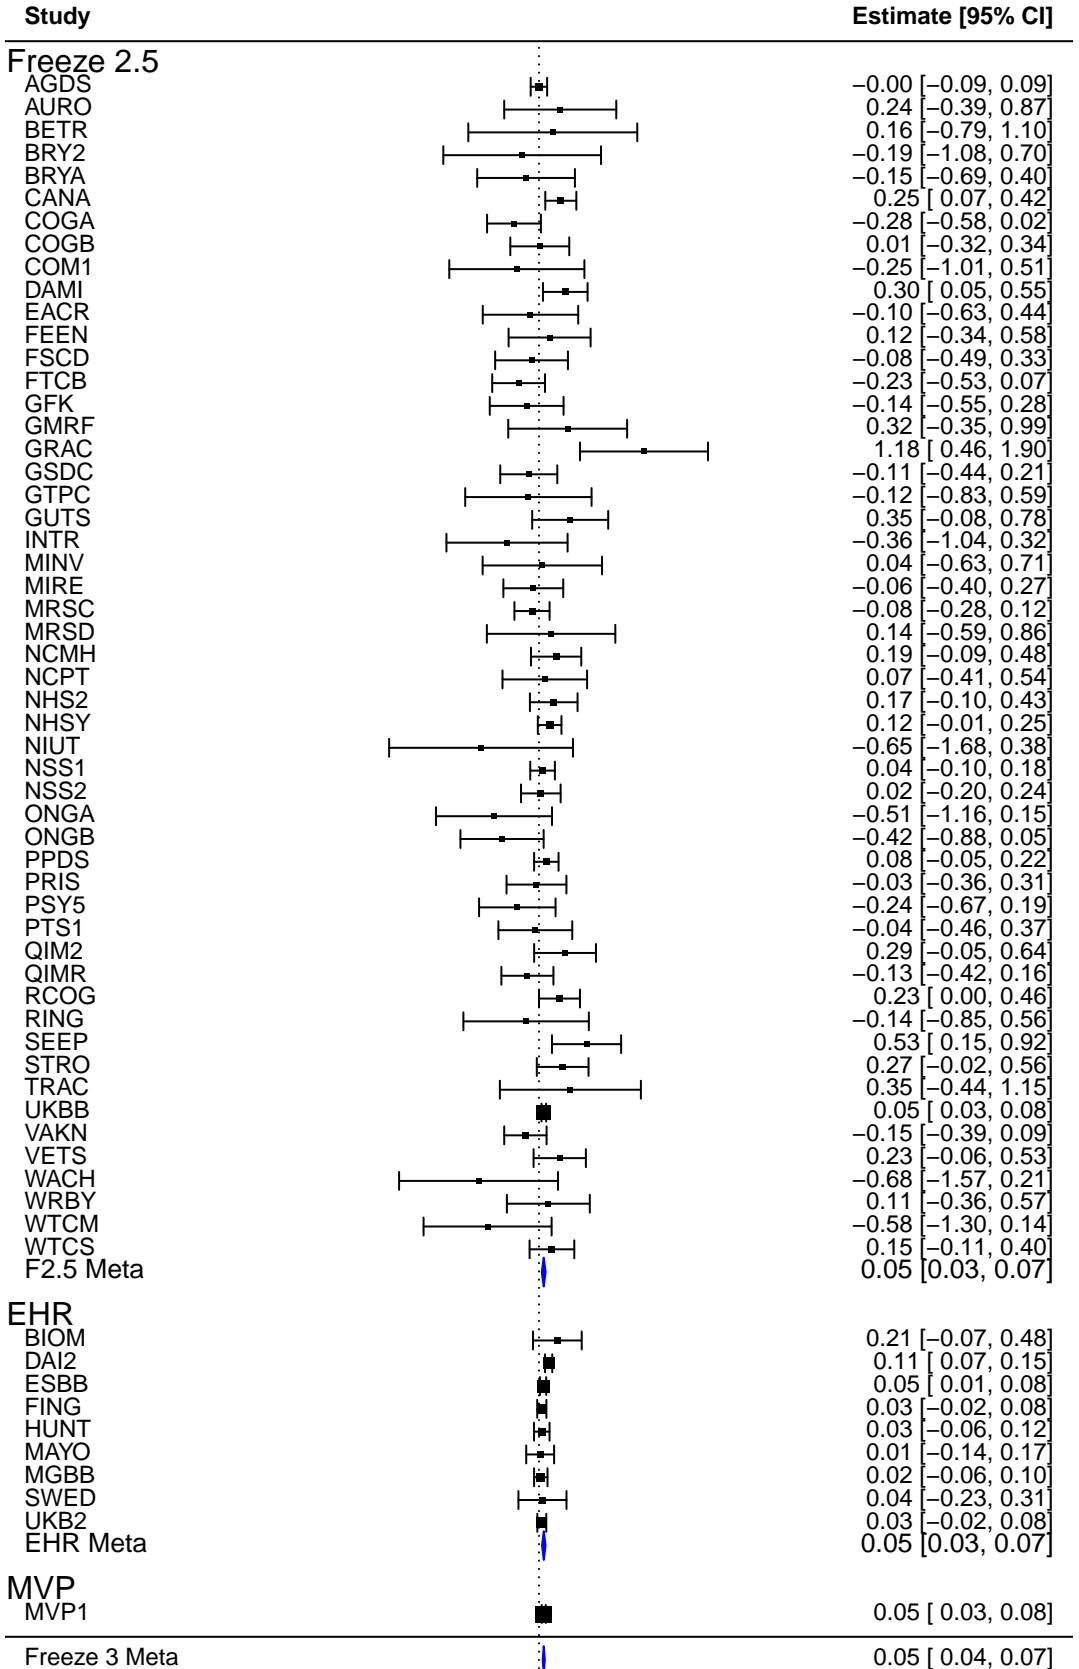

## rs559566 (Locus 53)

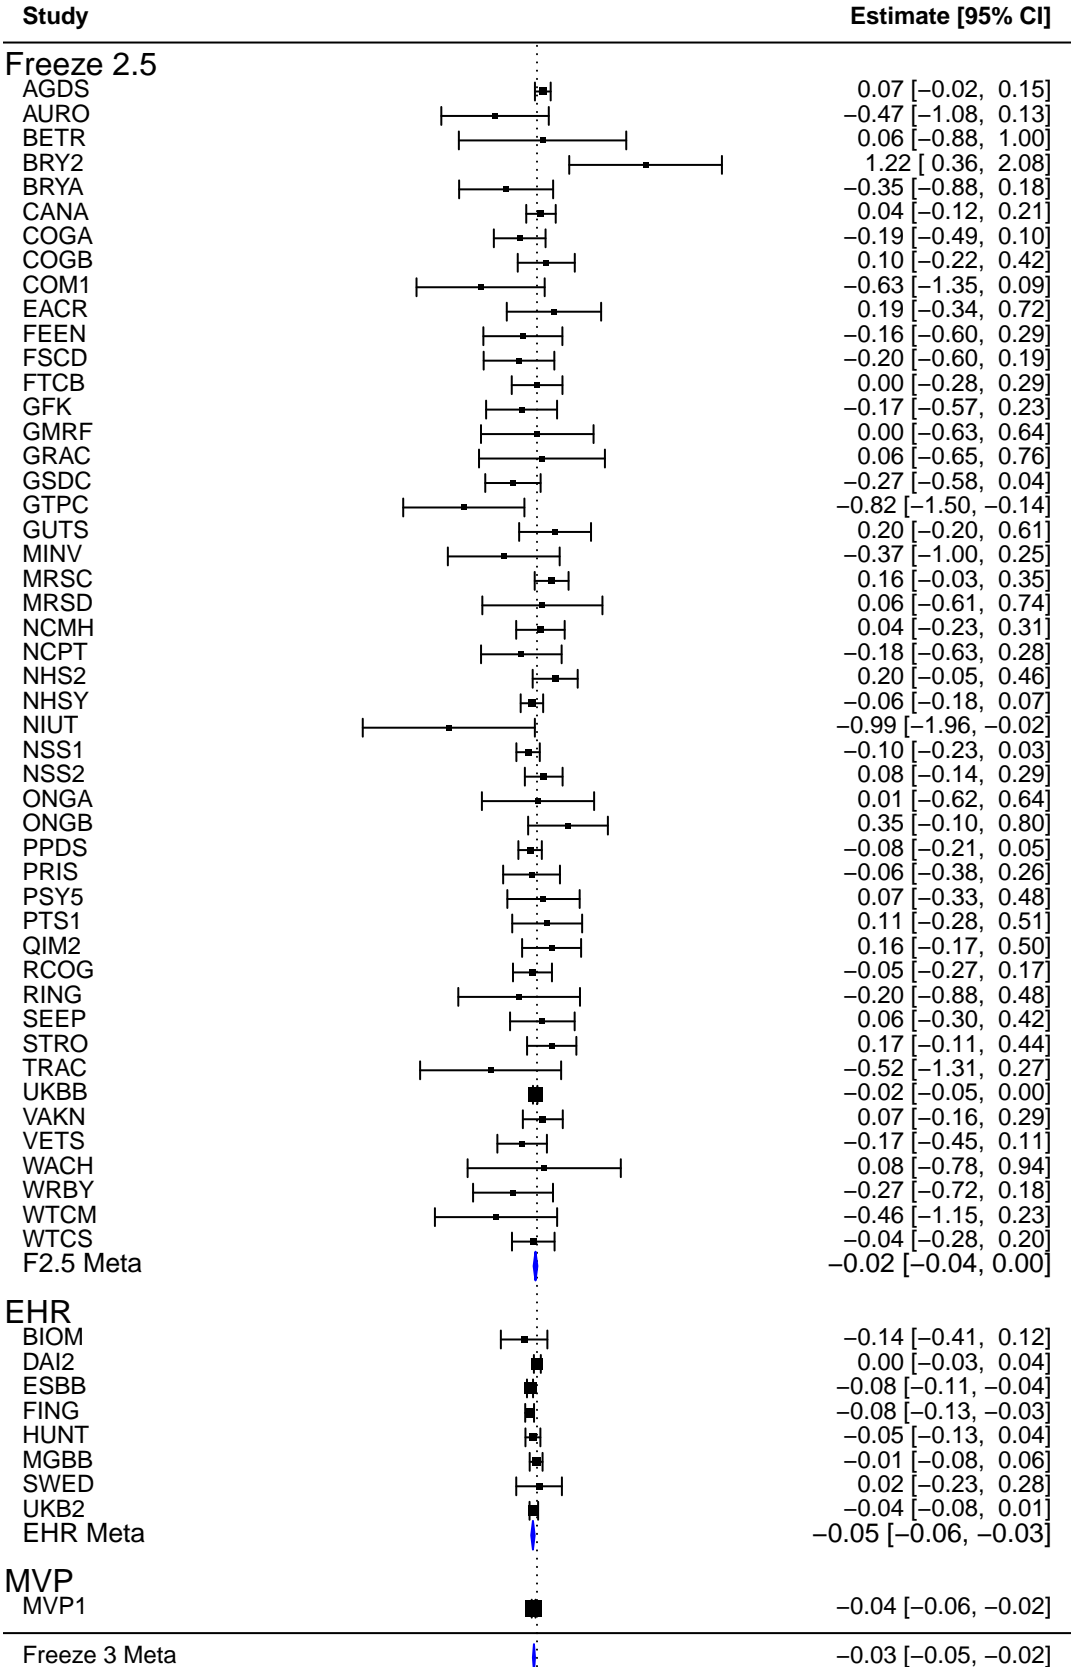

-2 -1 0 1 2 3

Observed Outcome

## rs2186710 (Locus 54)

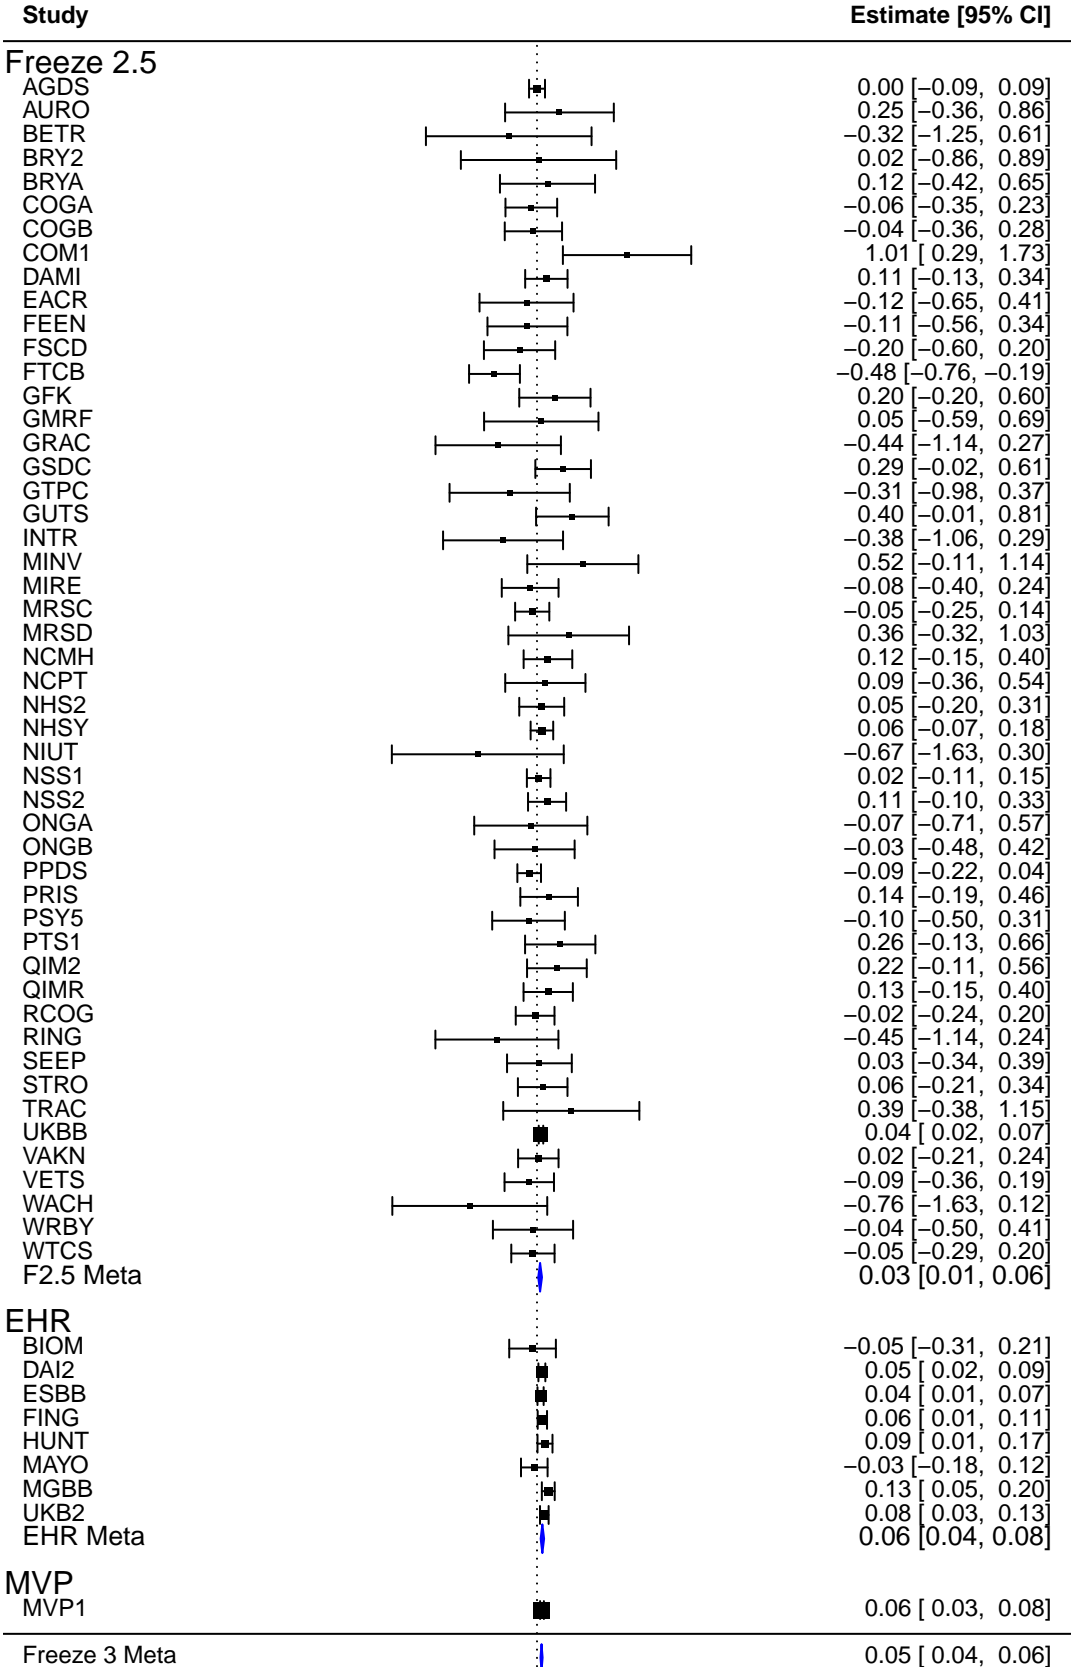

## rs10842260 (Locus 55)

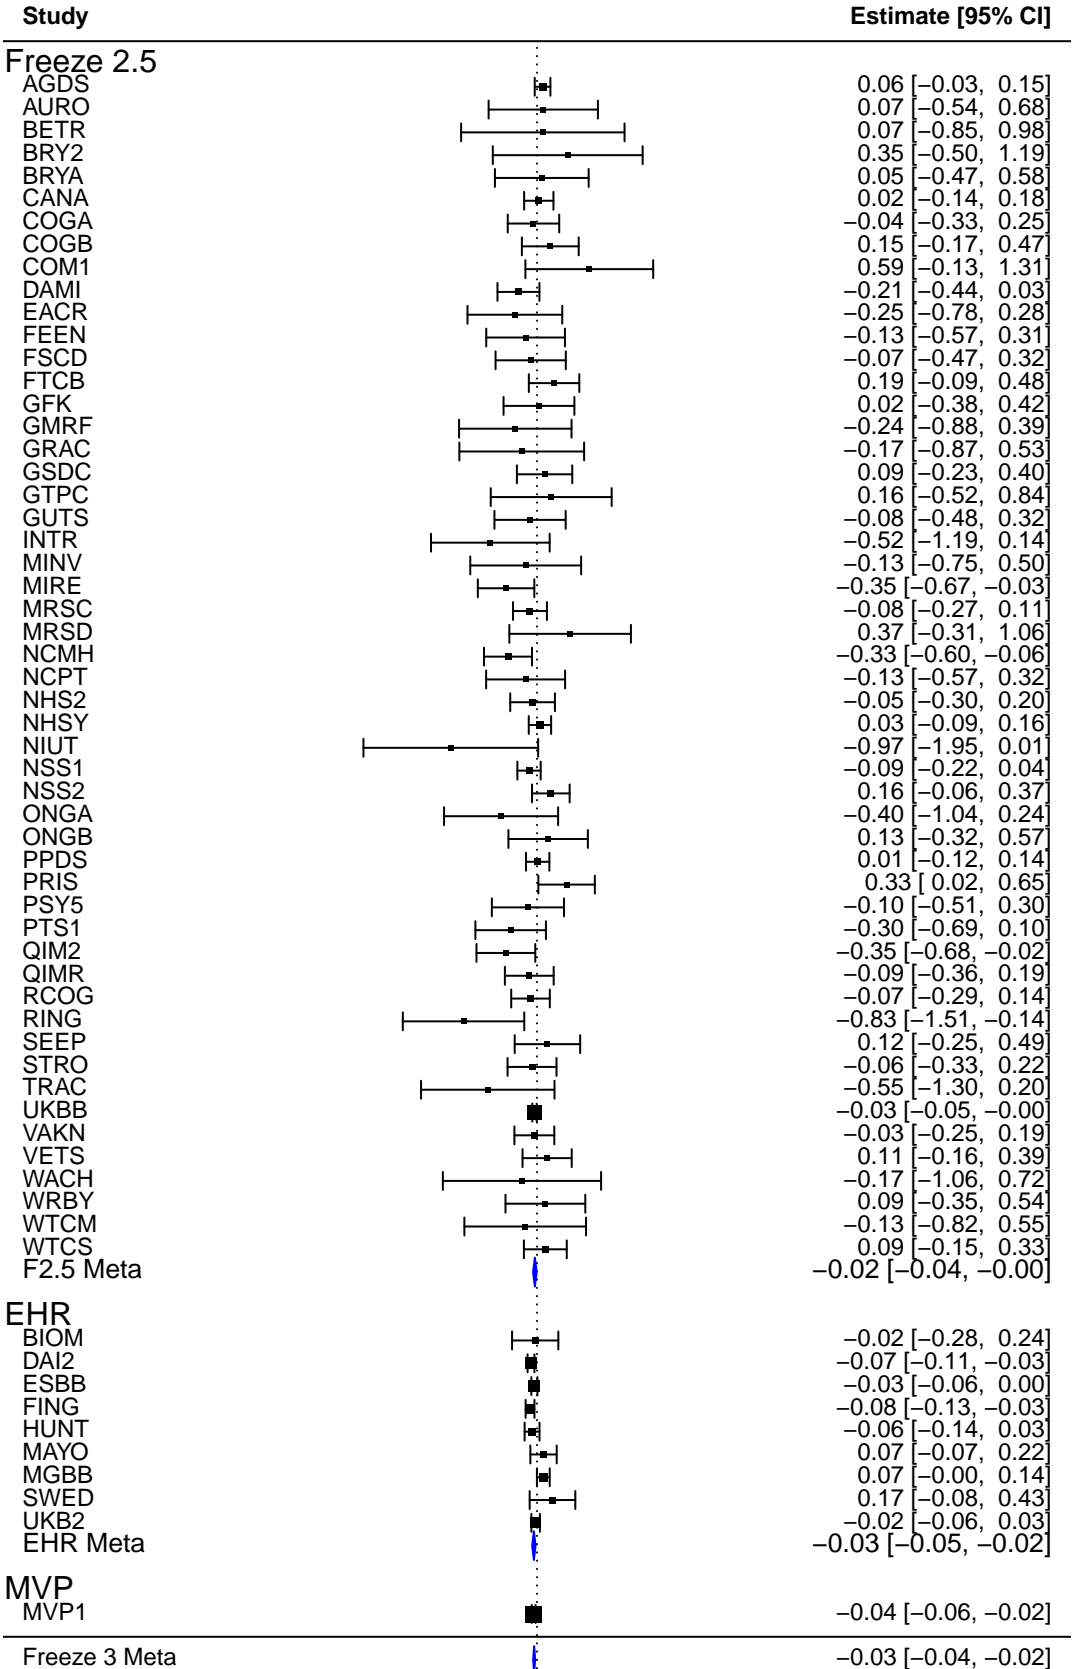



## rs2292996 (Locus 56)

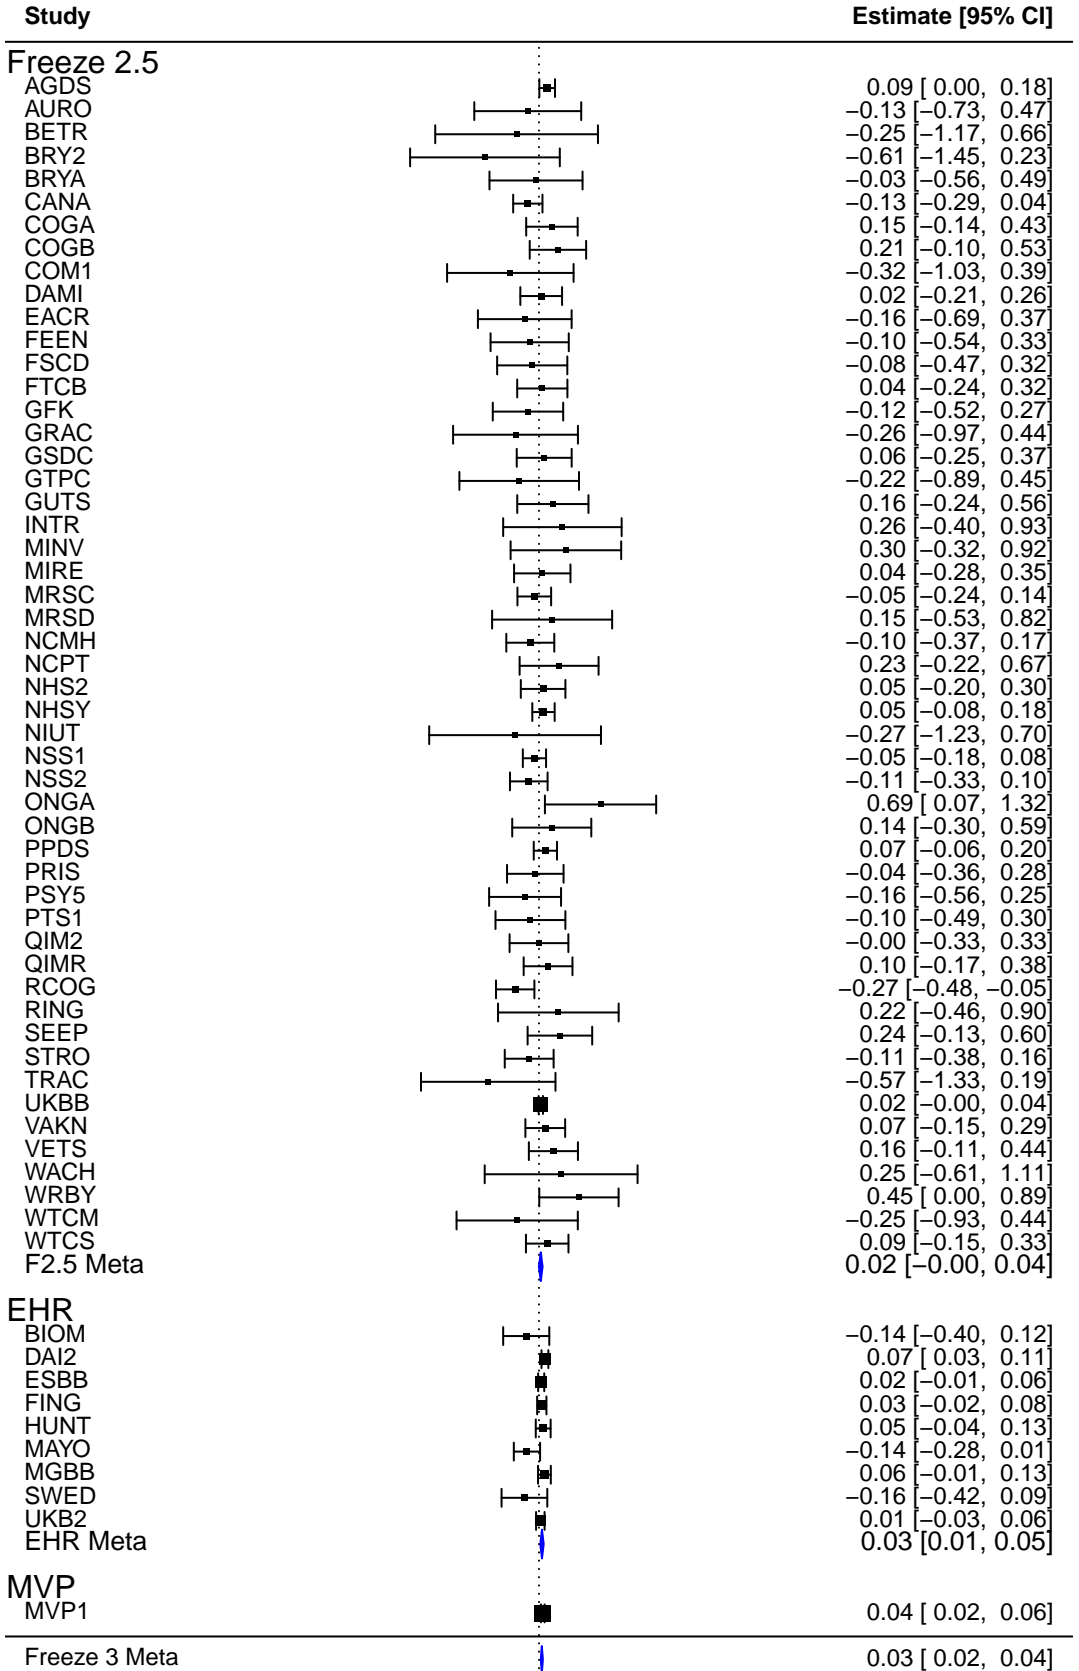

## rs816363 (Locus 57)

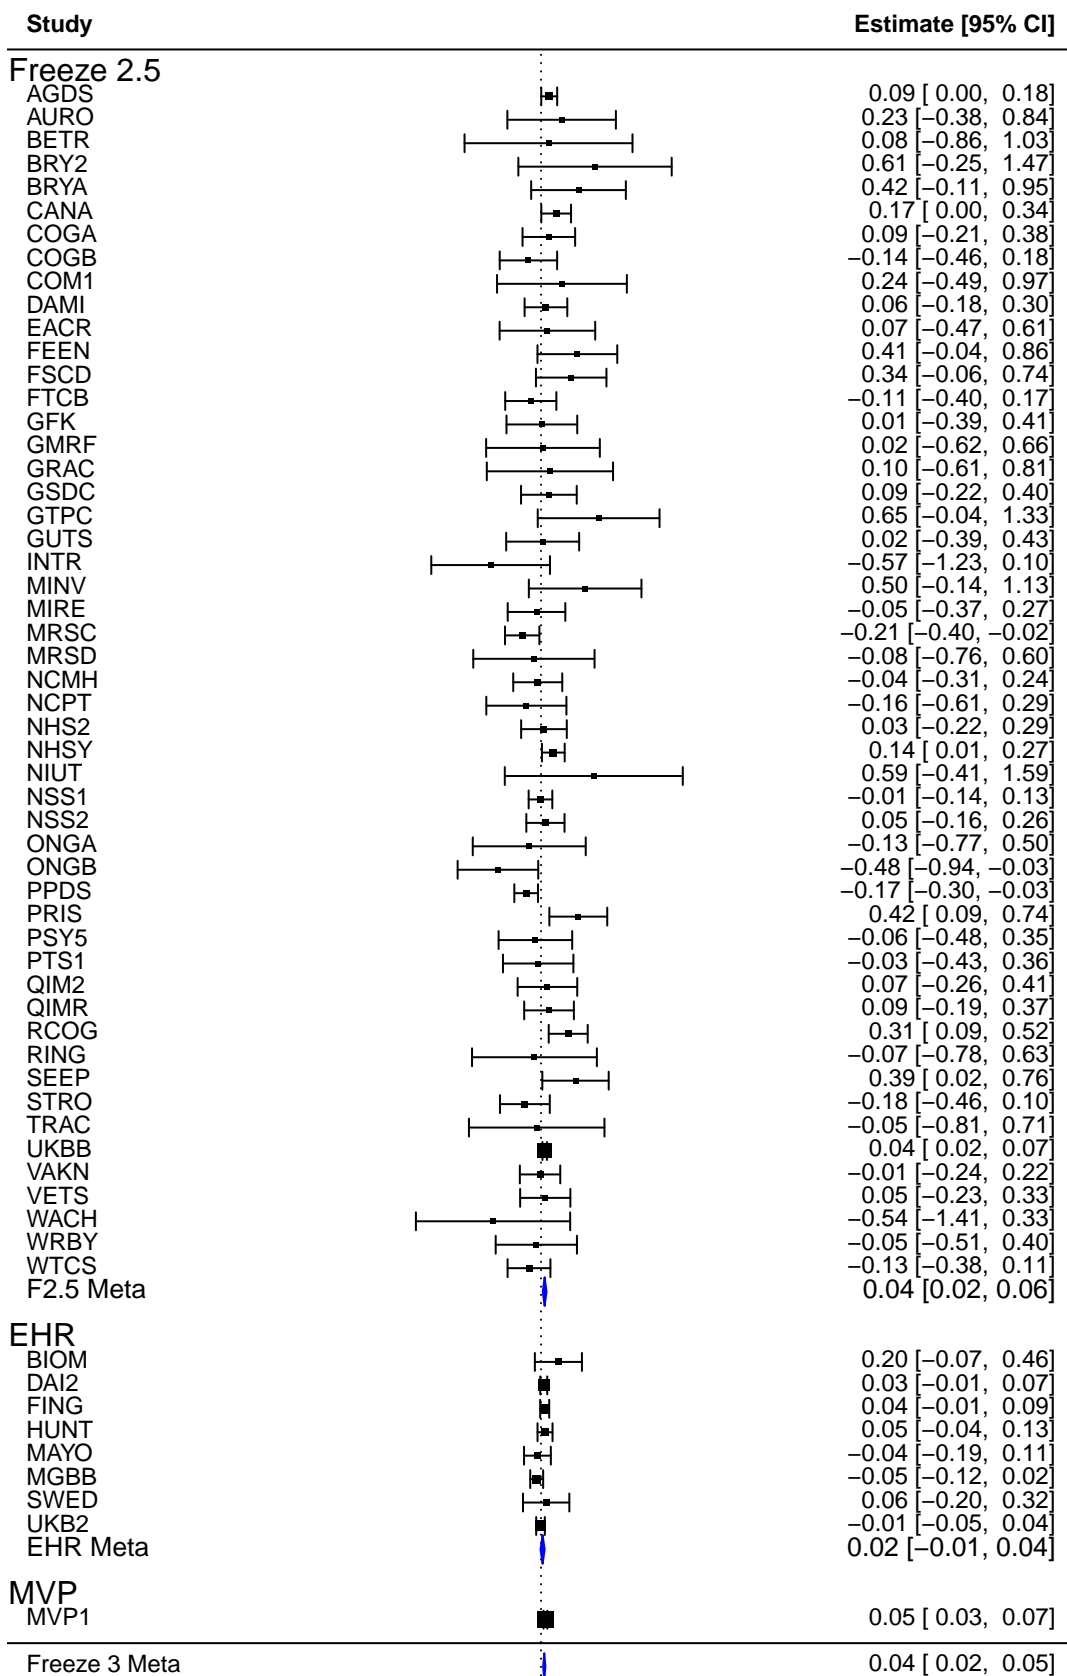

## rs61946067 (Locus 58)

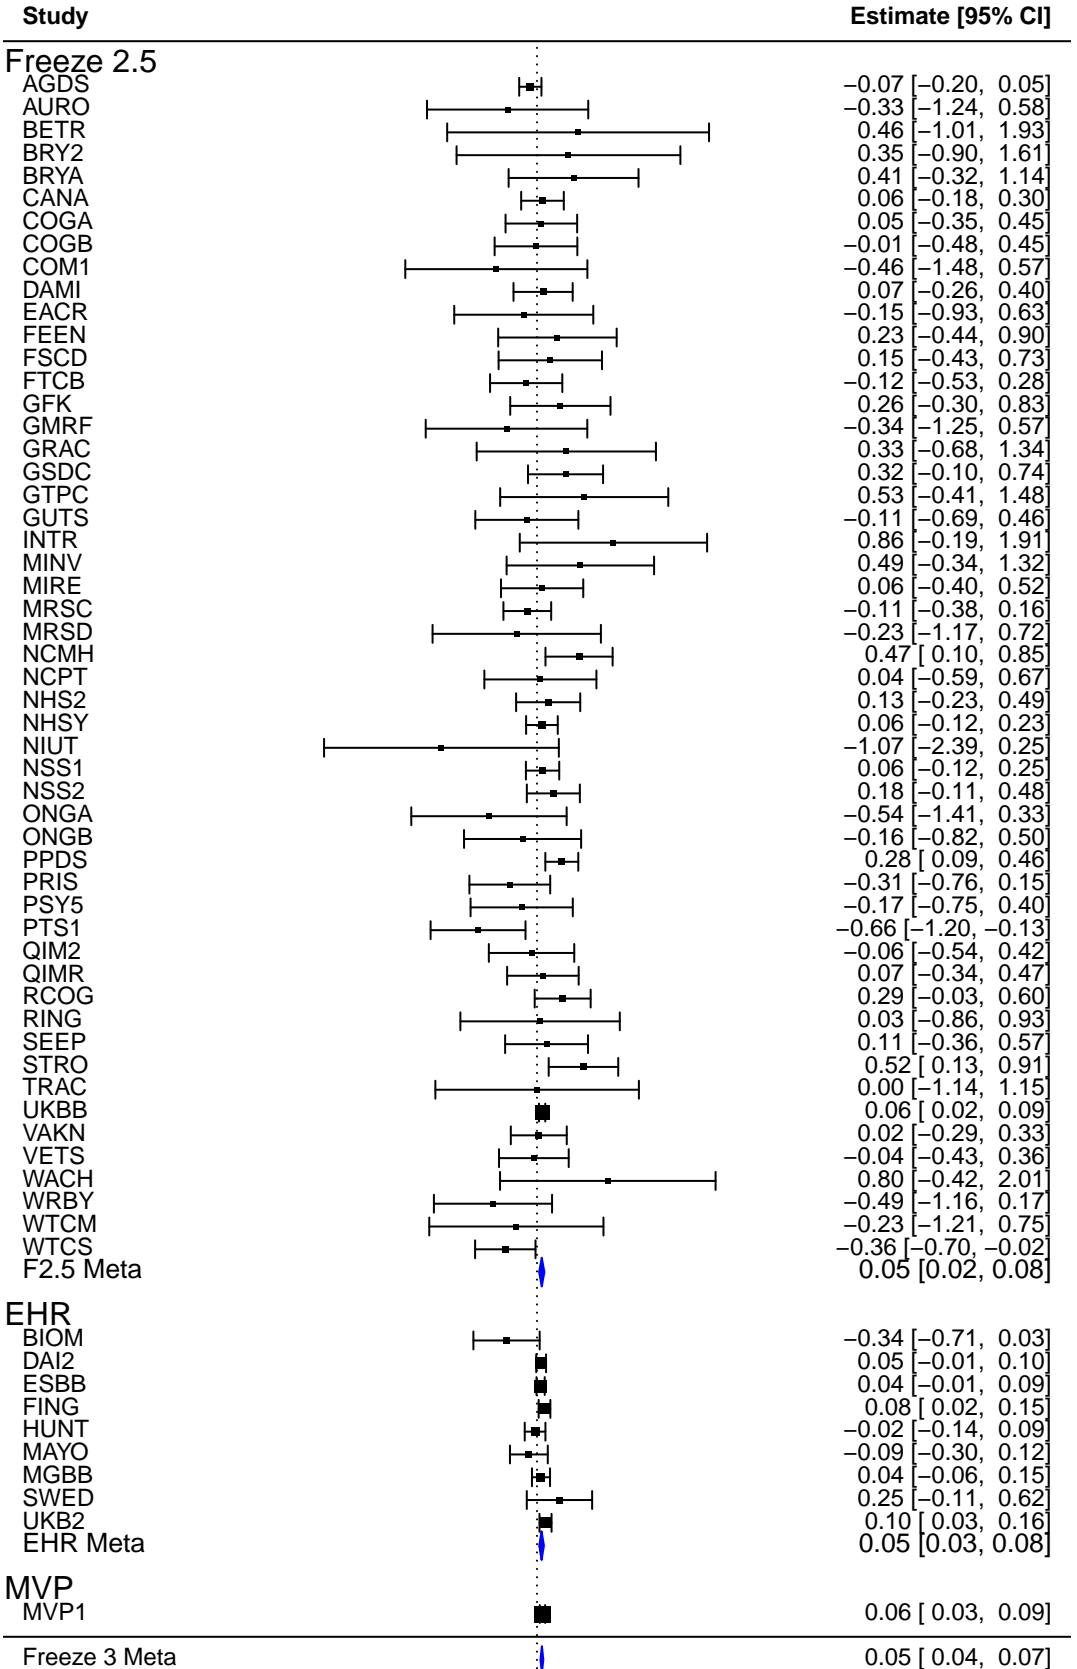

-3 -2 -1 0 1 2 3

Observed Outcome

rs1373273 (Locus 59)

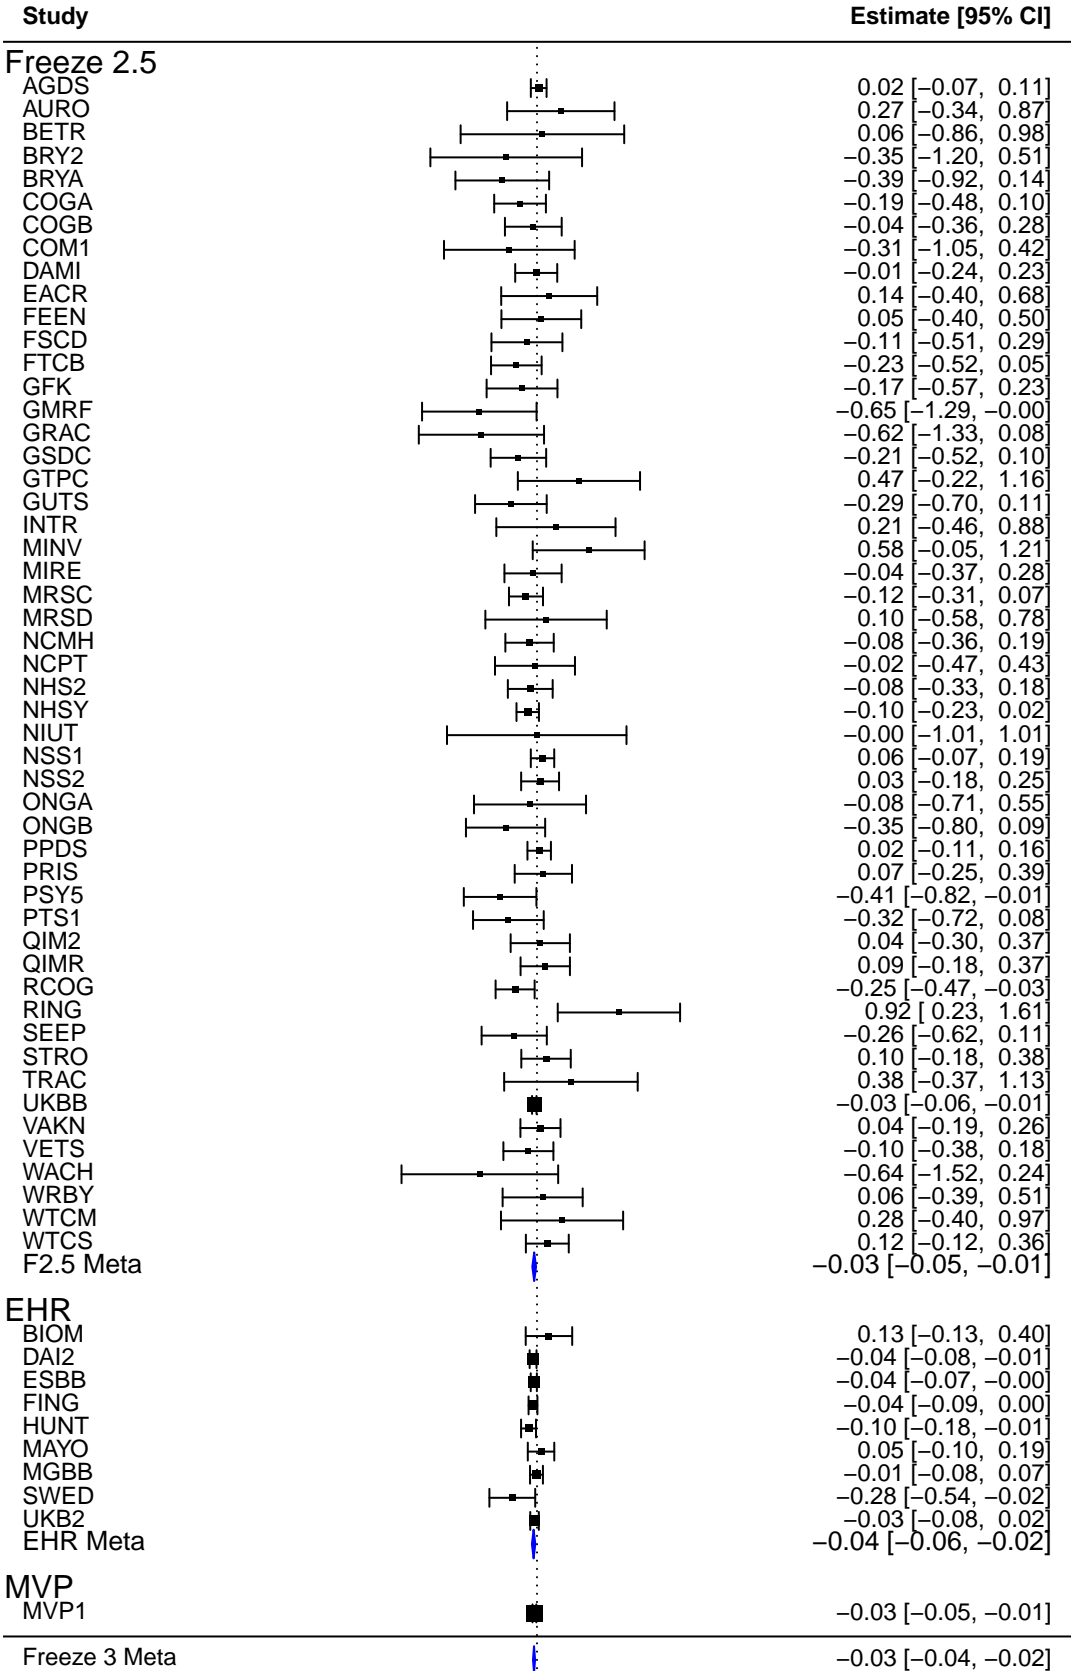

Observed Outcome

rs7333625 (Locus 60)

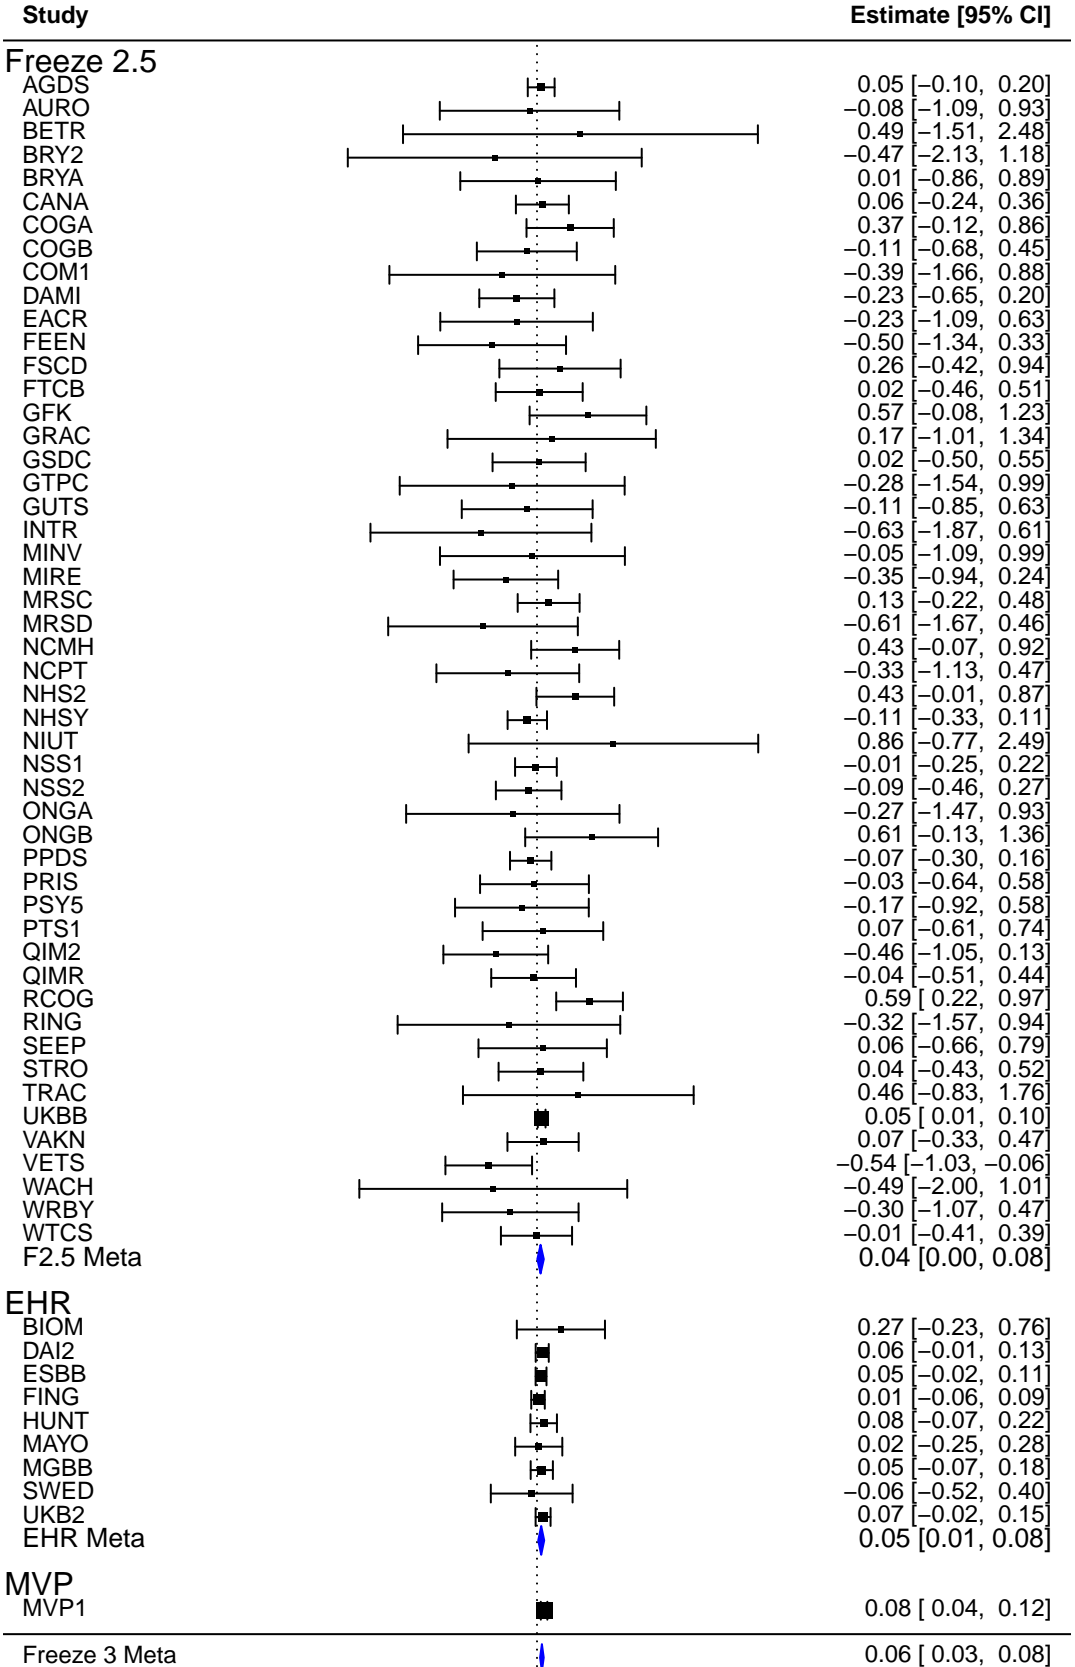

rs11628299 (Locus 61)

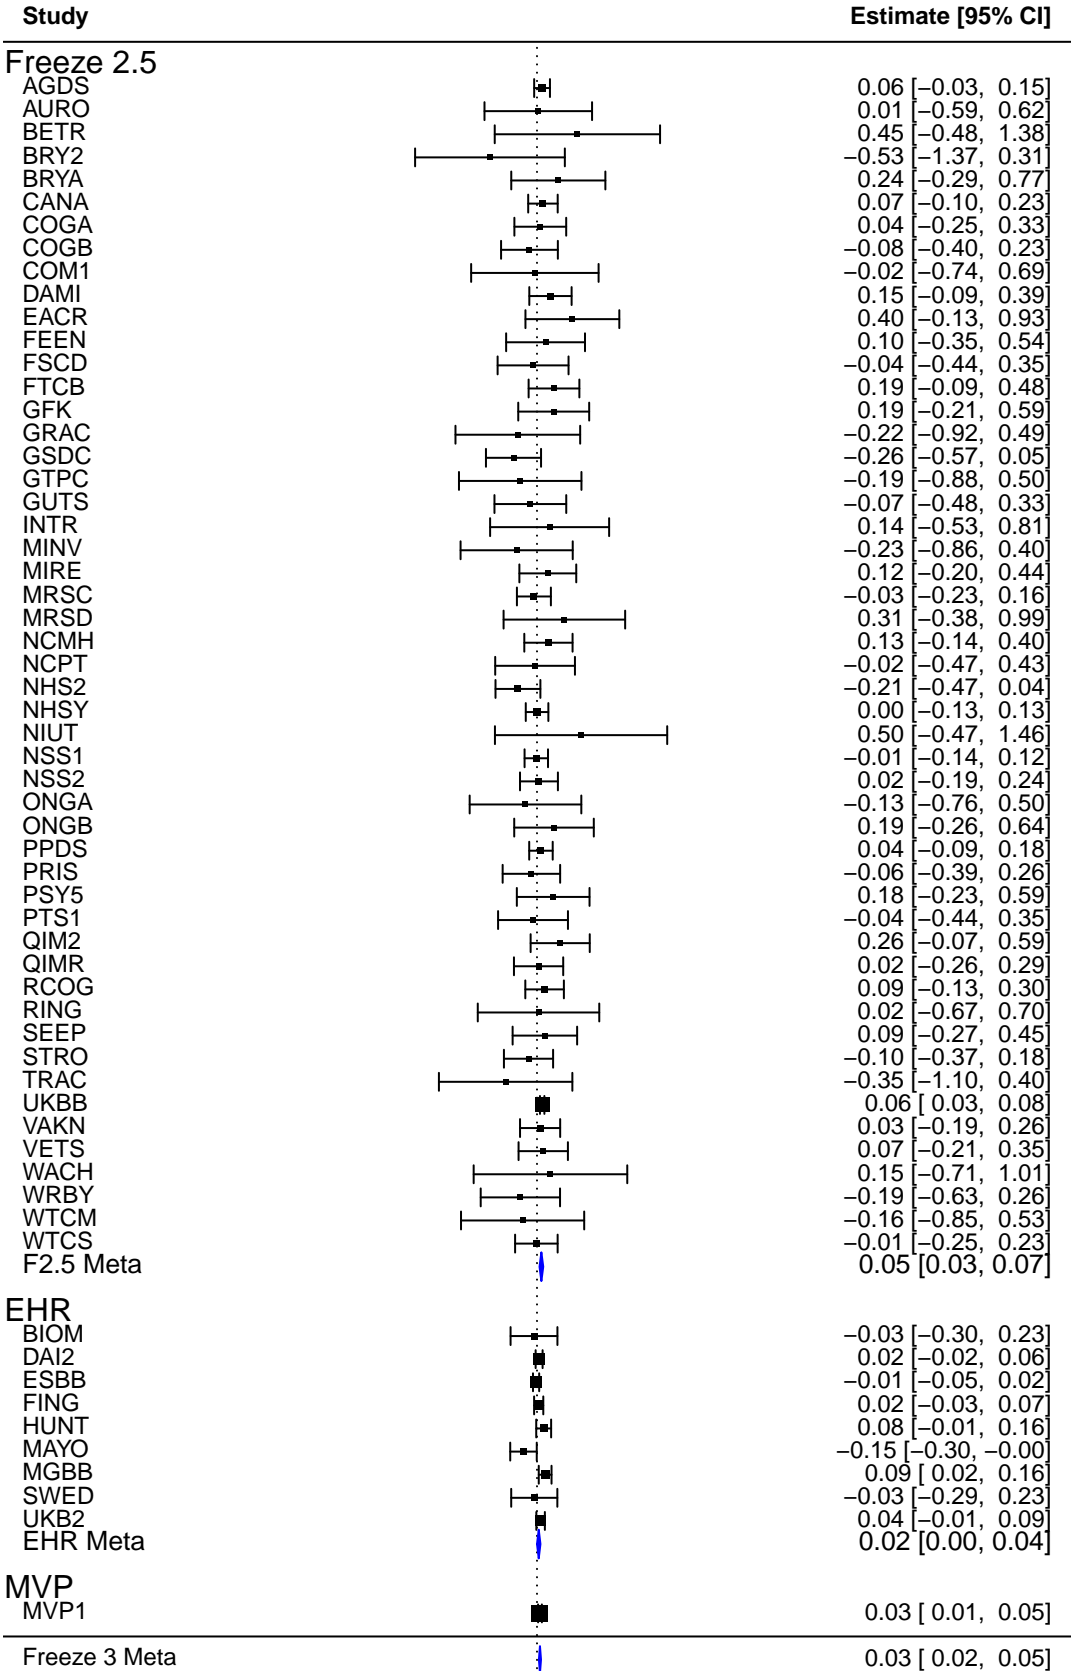

Observed Outcome

rs2899991 (Locus 62)

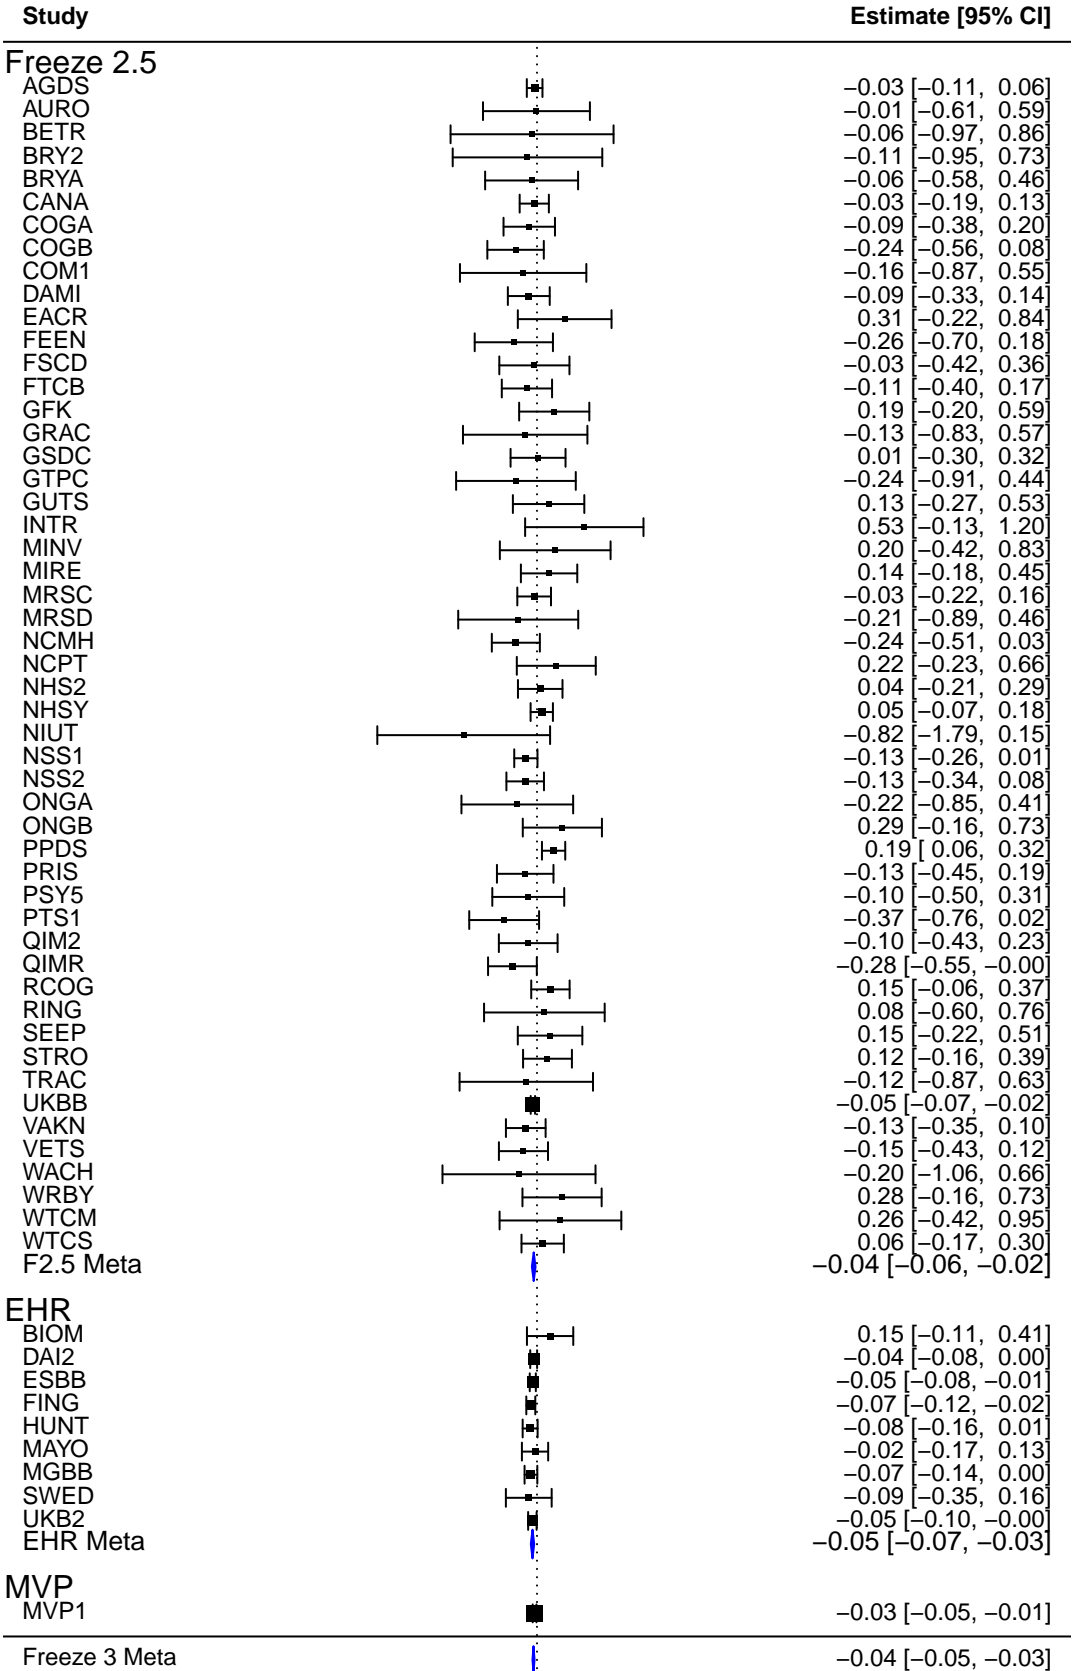

Observed Outcome

rs7141058 (Locus 63)

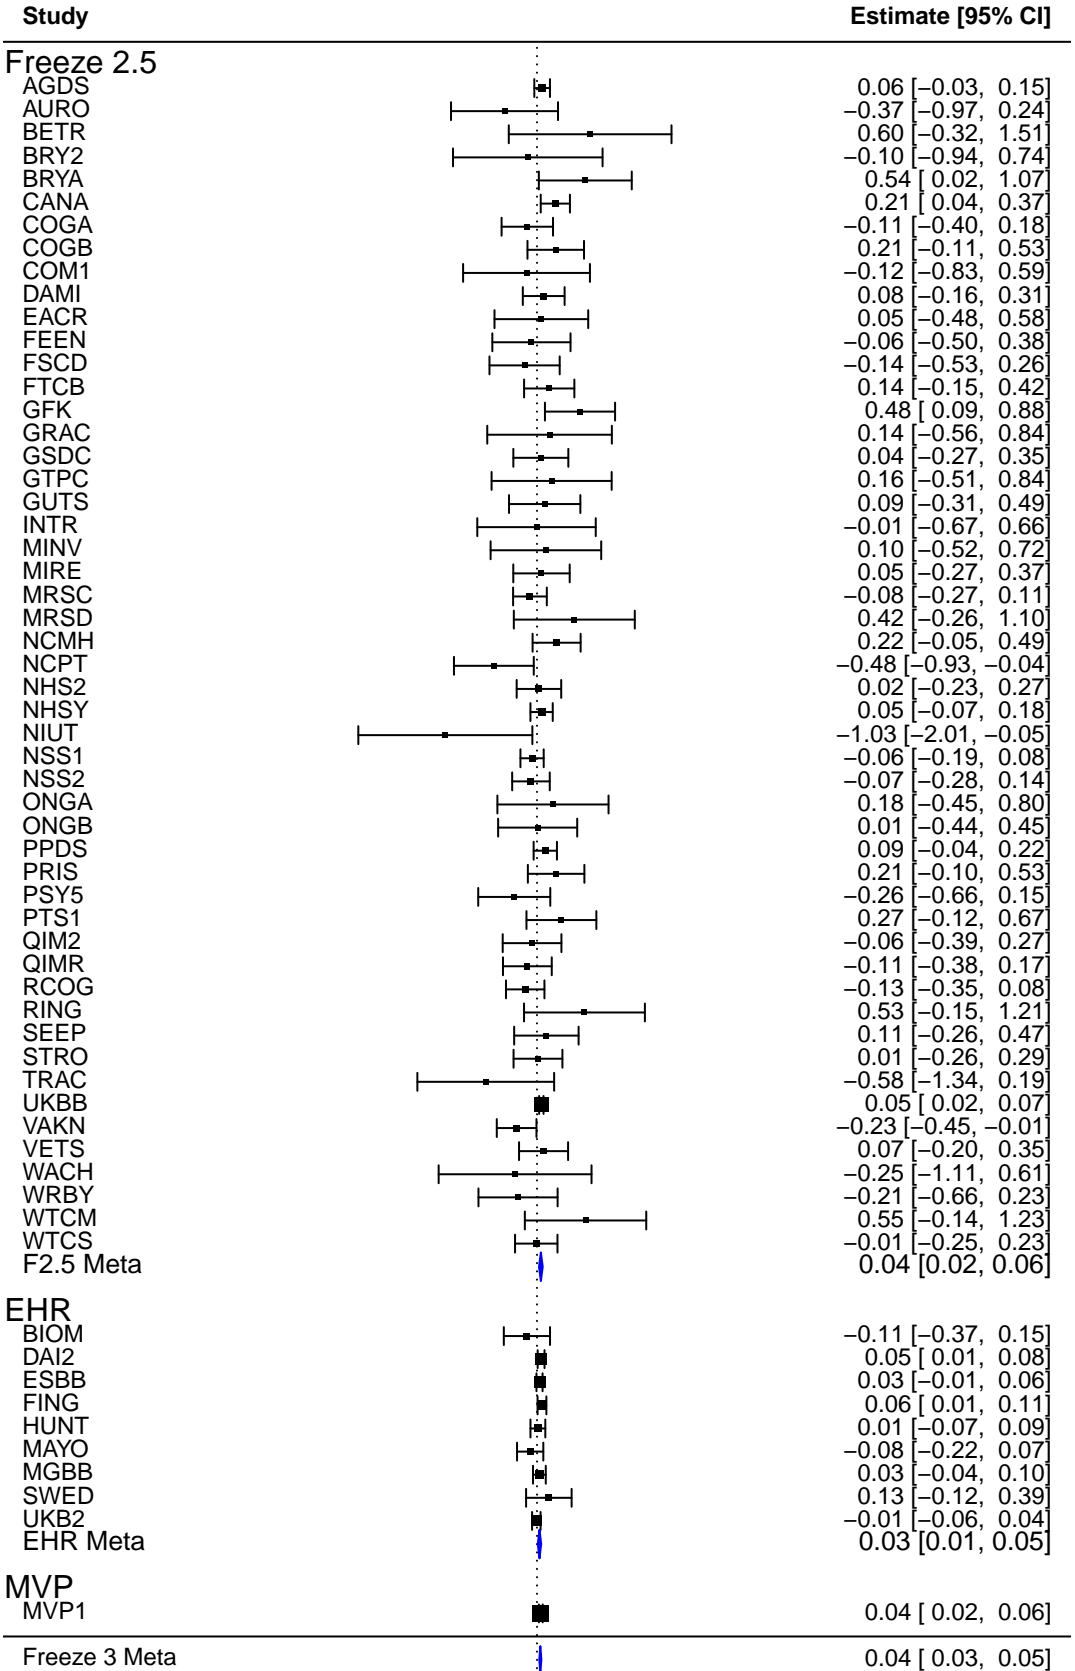



rs10132977 (Locus 64)

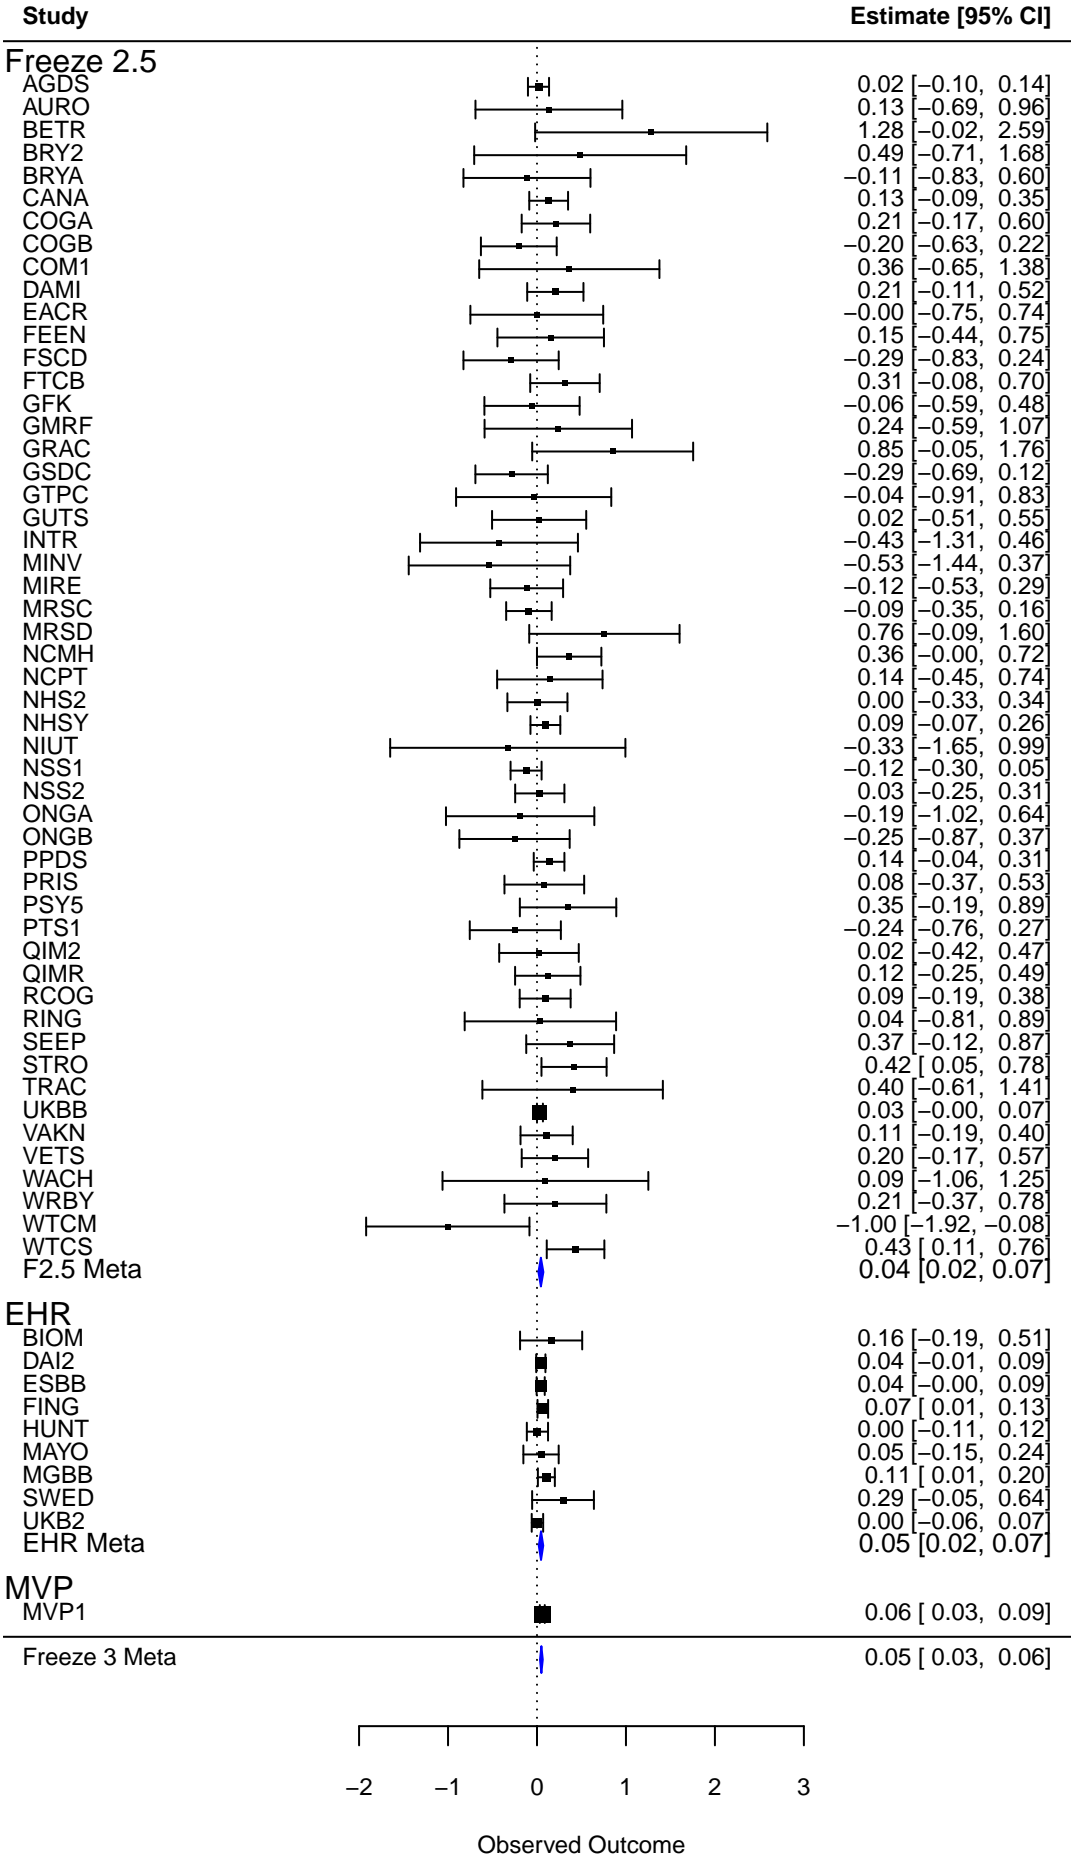

rs7170398 (Locus 65)

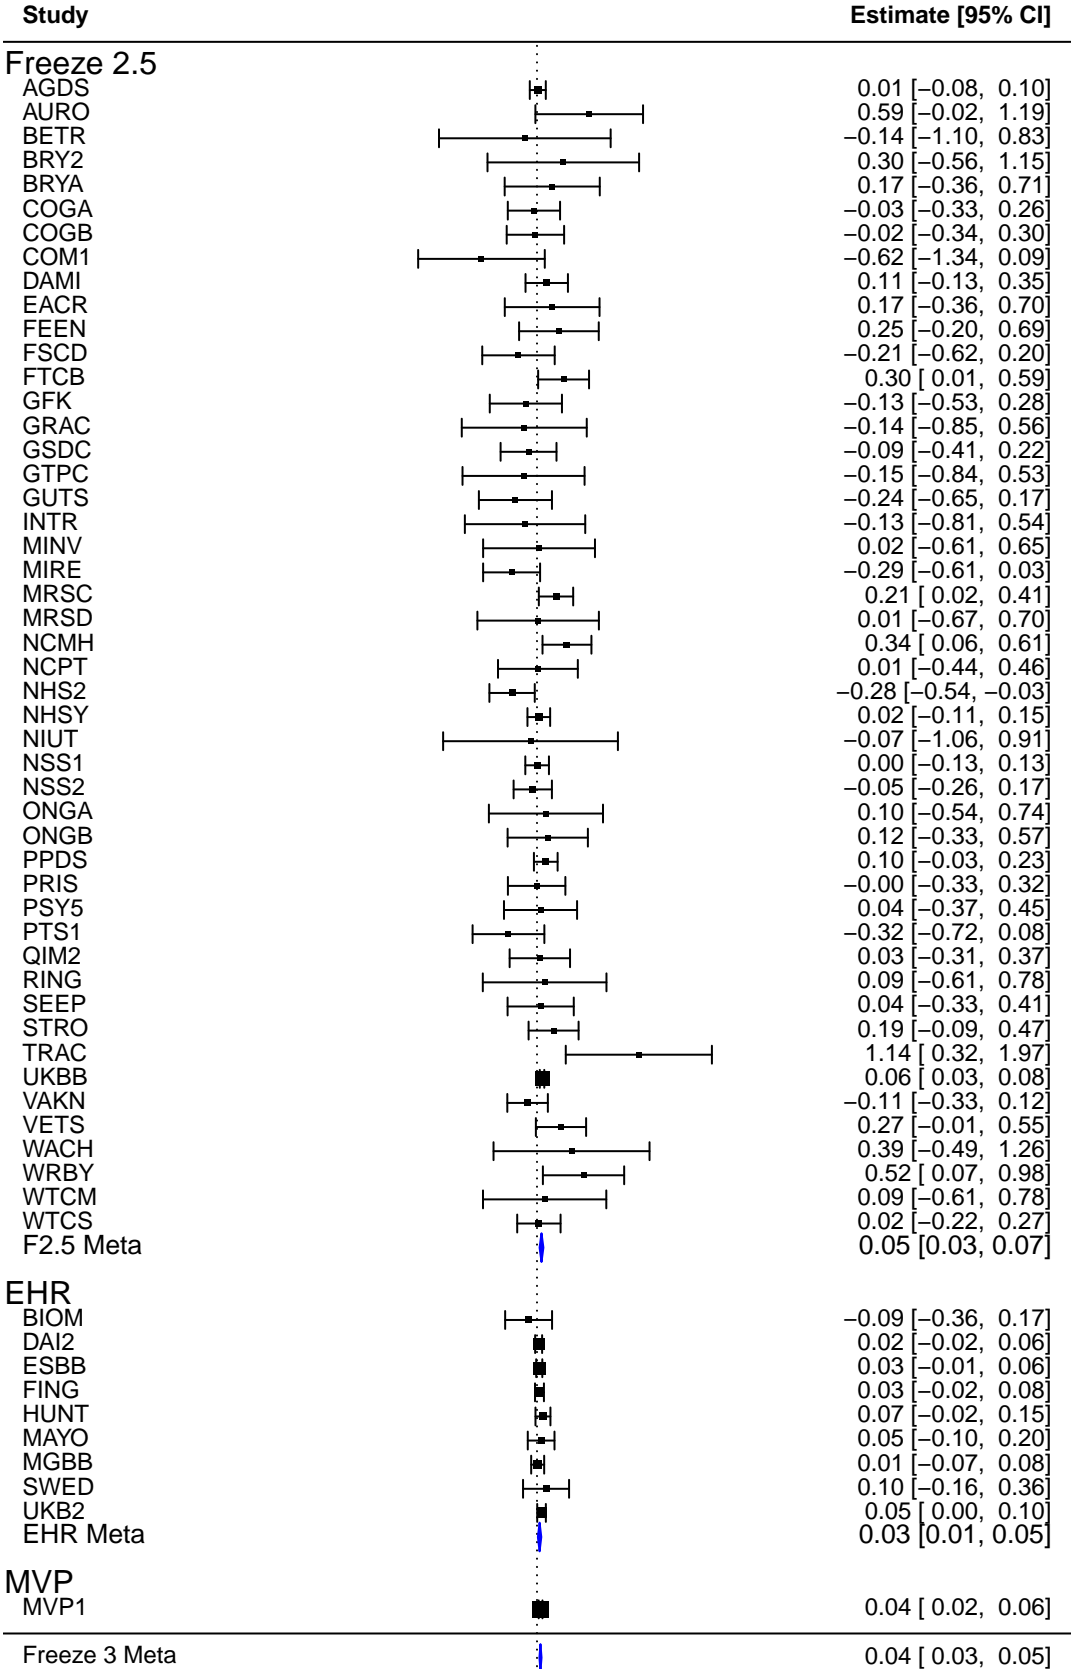

Observed Outcome

## rs17514846 (Locus 66)

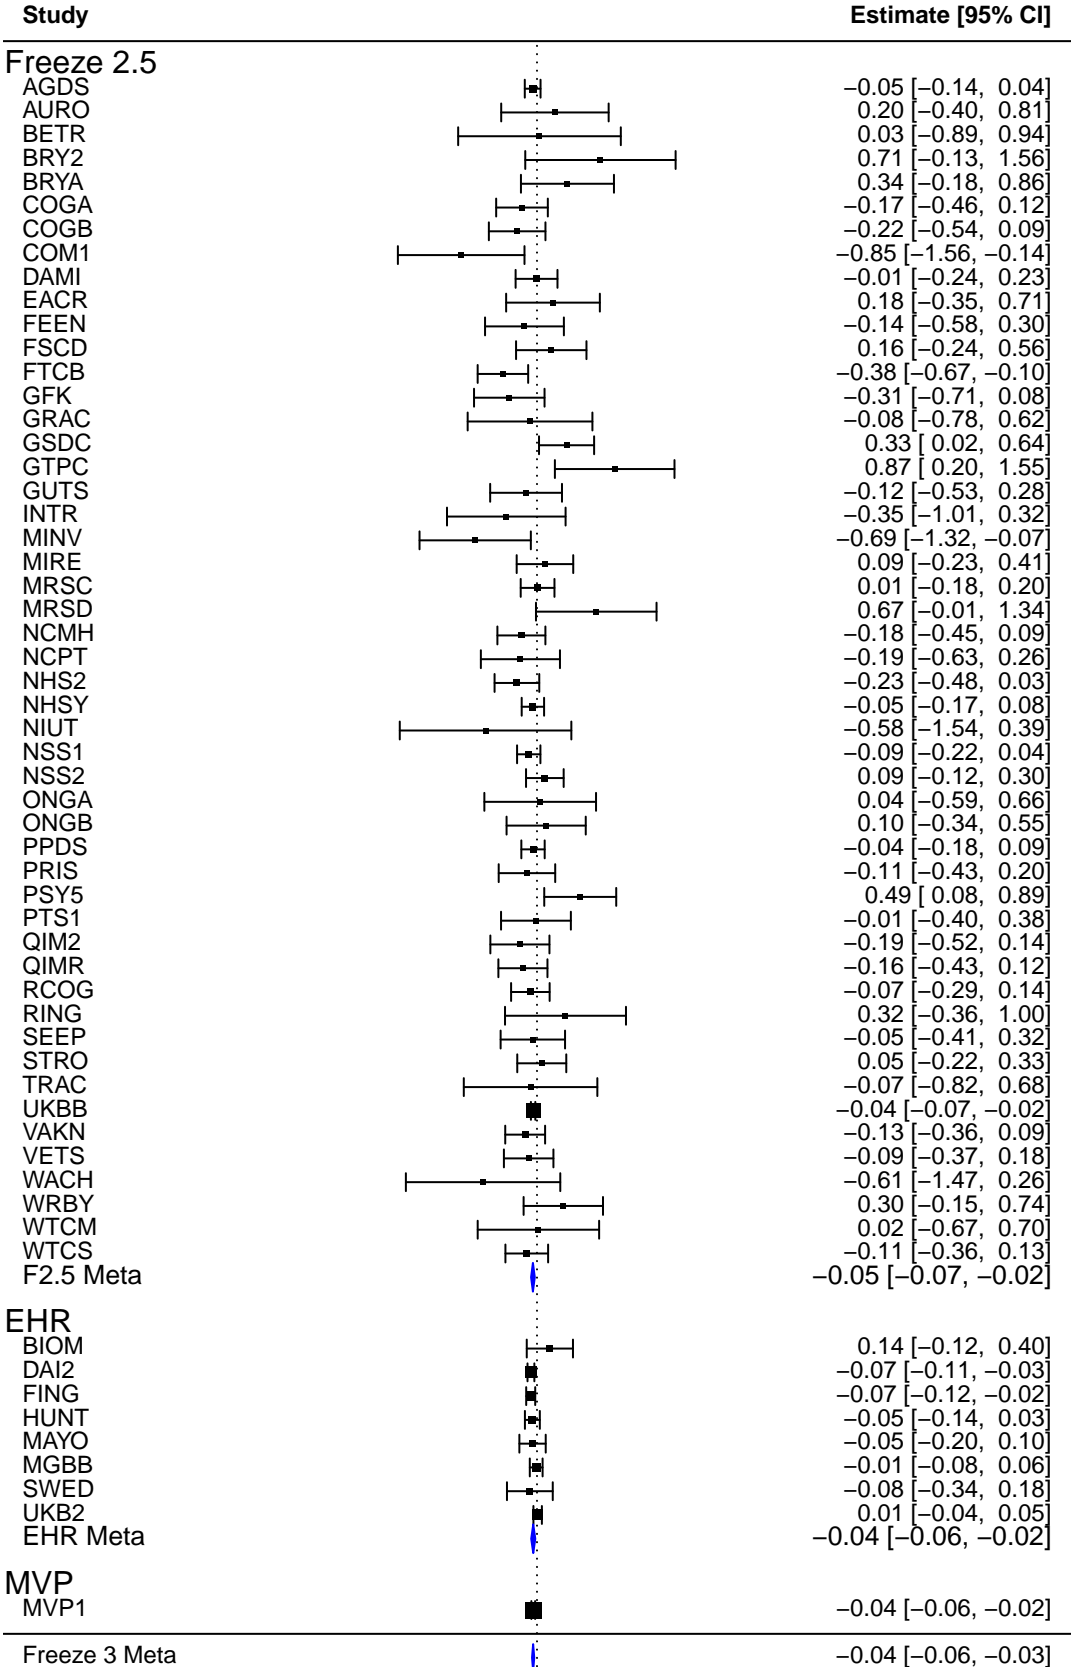

rs1861188 (Locus 67)

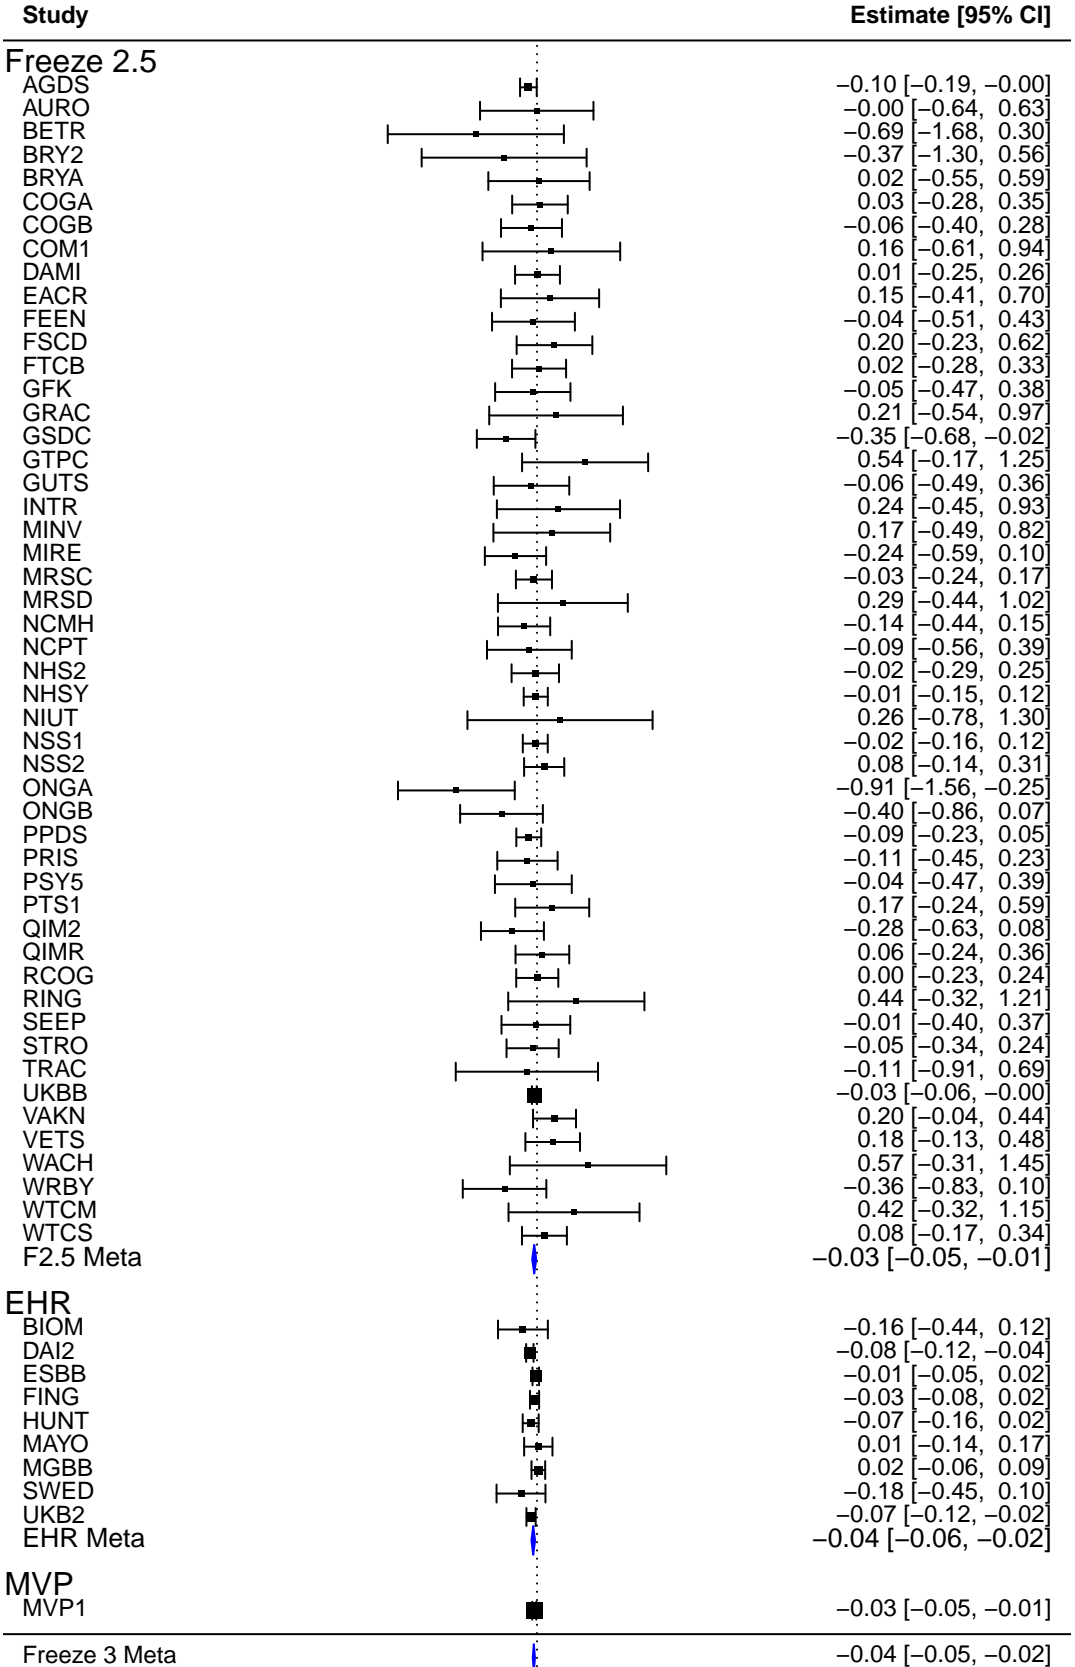

Observed Outcome

rs7200432 (Locus 68)

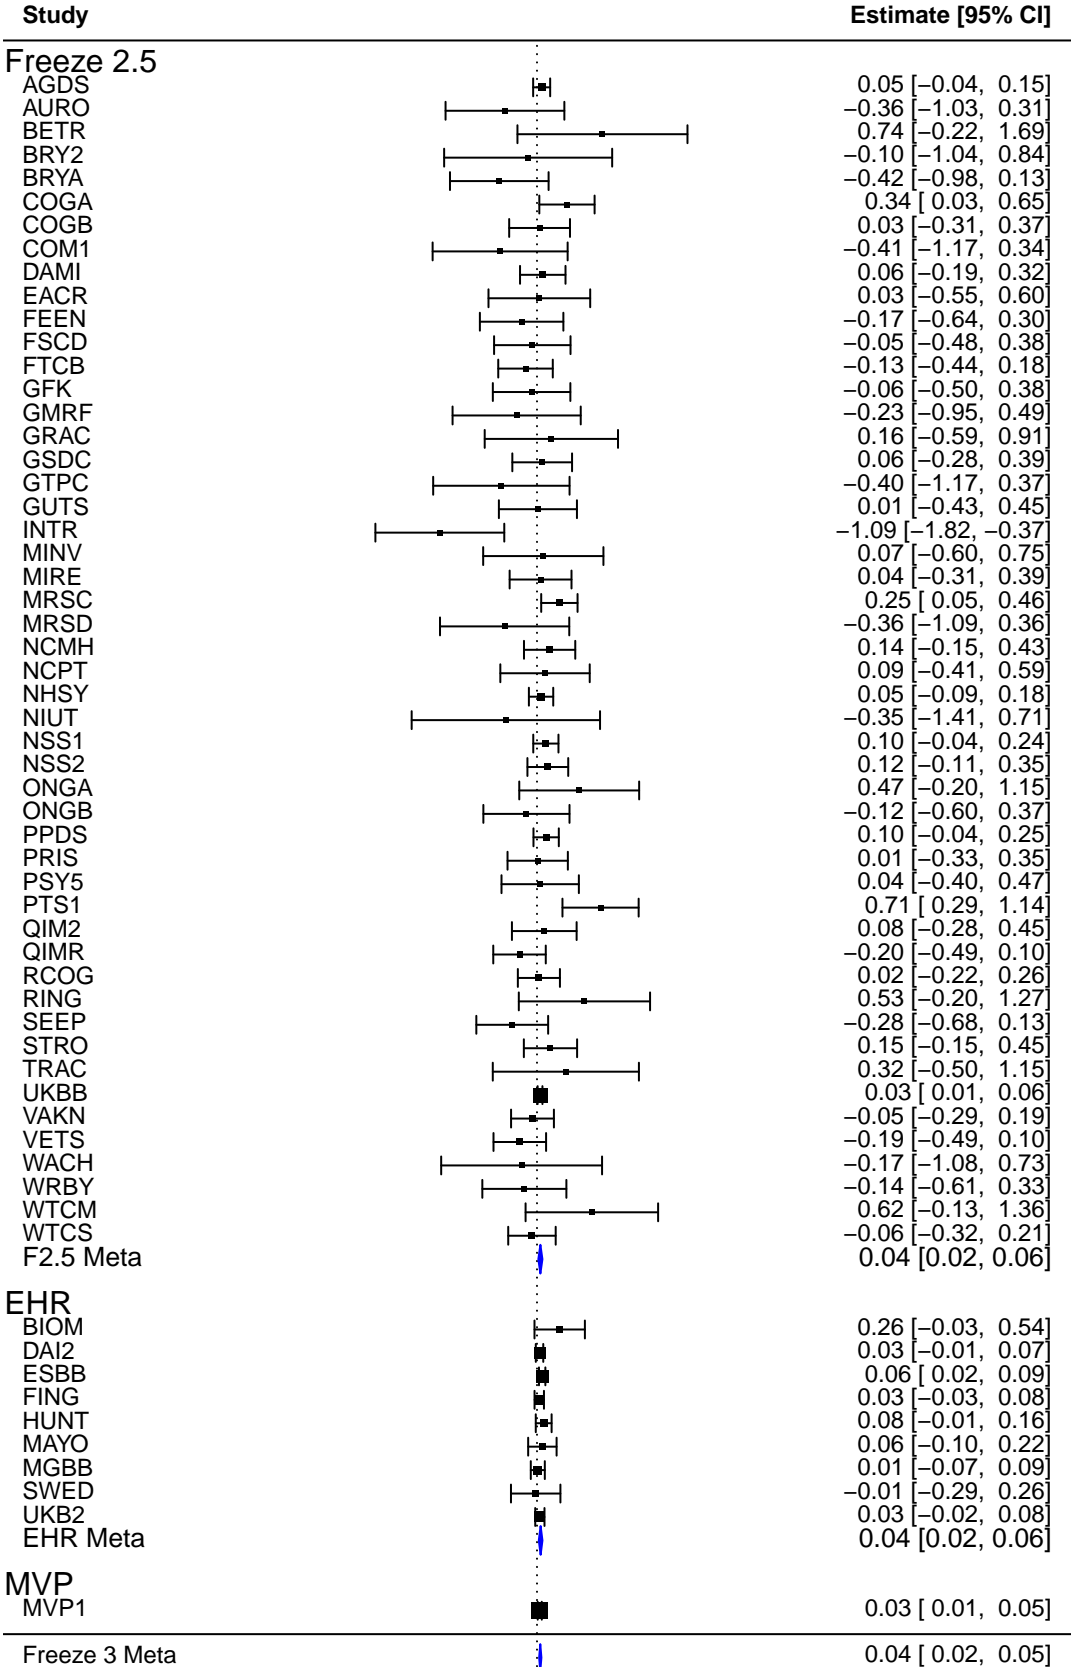

Observed Outcome

rs143133717 (Locus 69)

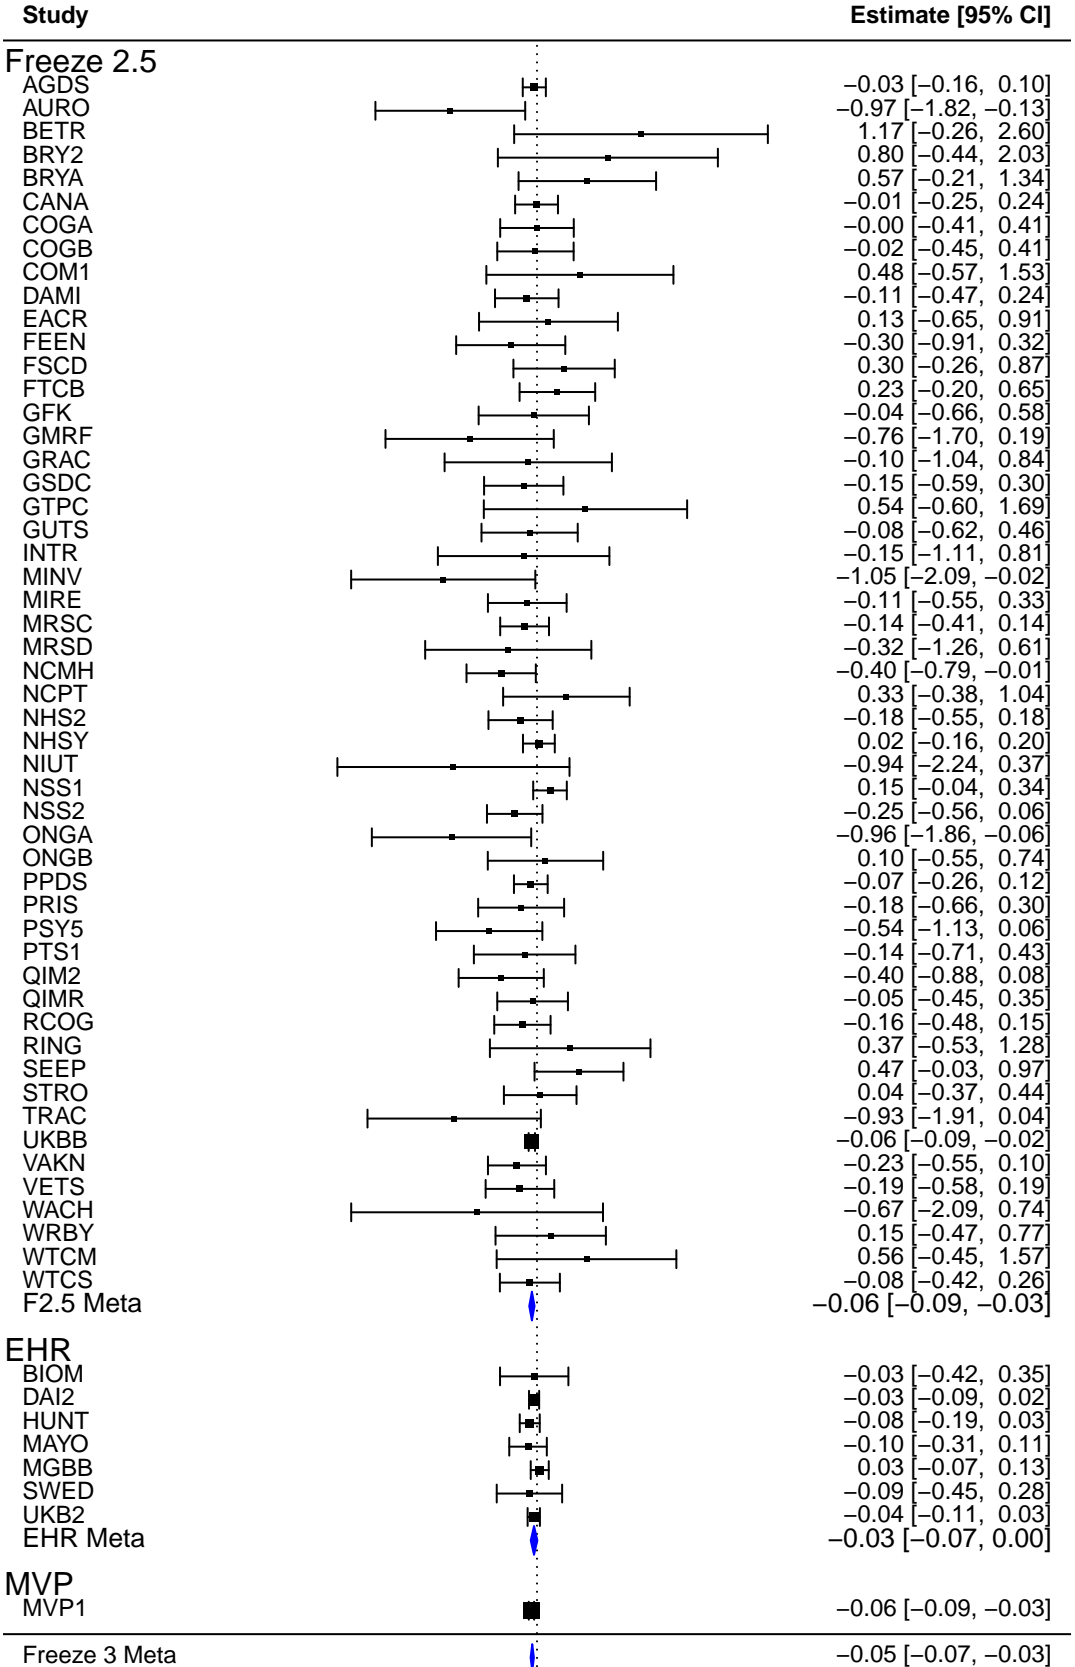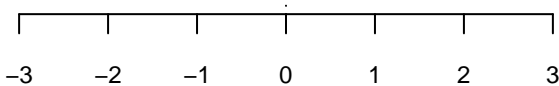

Observed Outcome

rs2684641 (Locus 70)

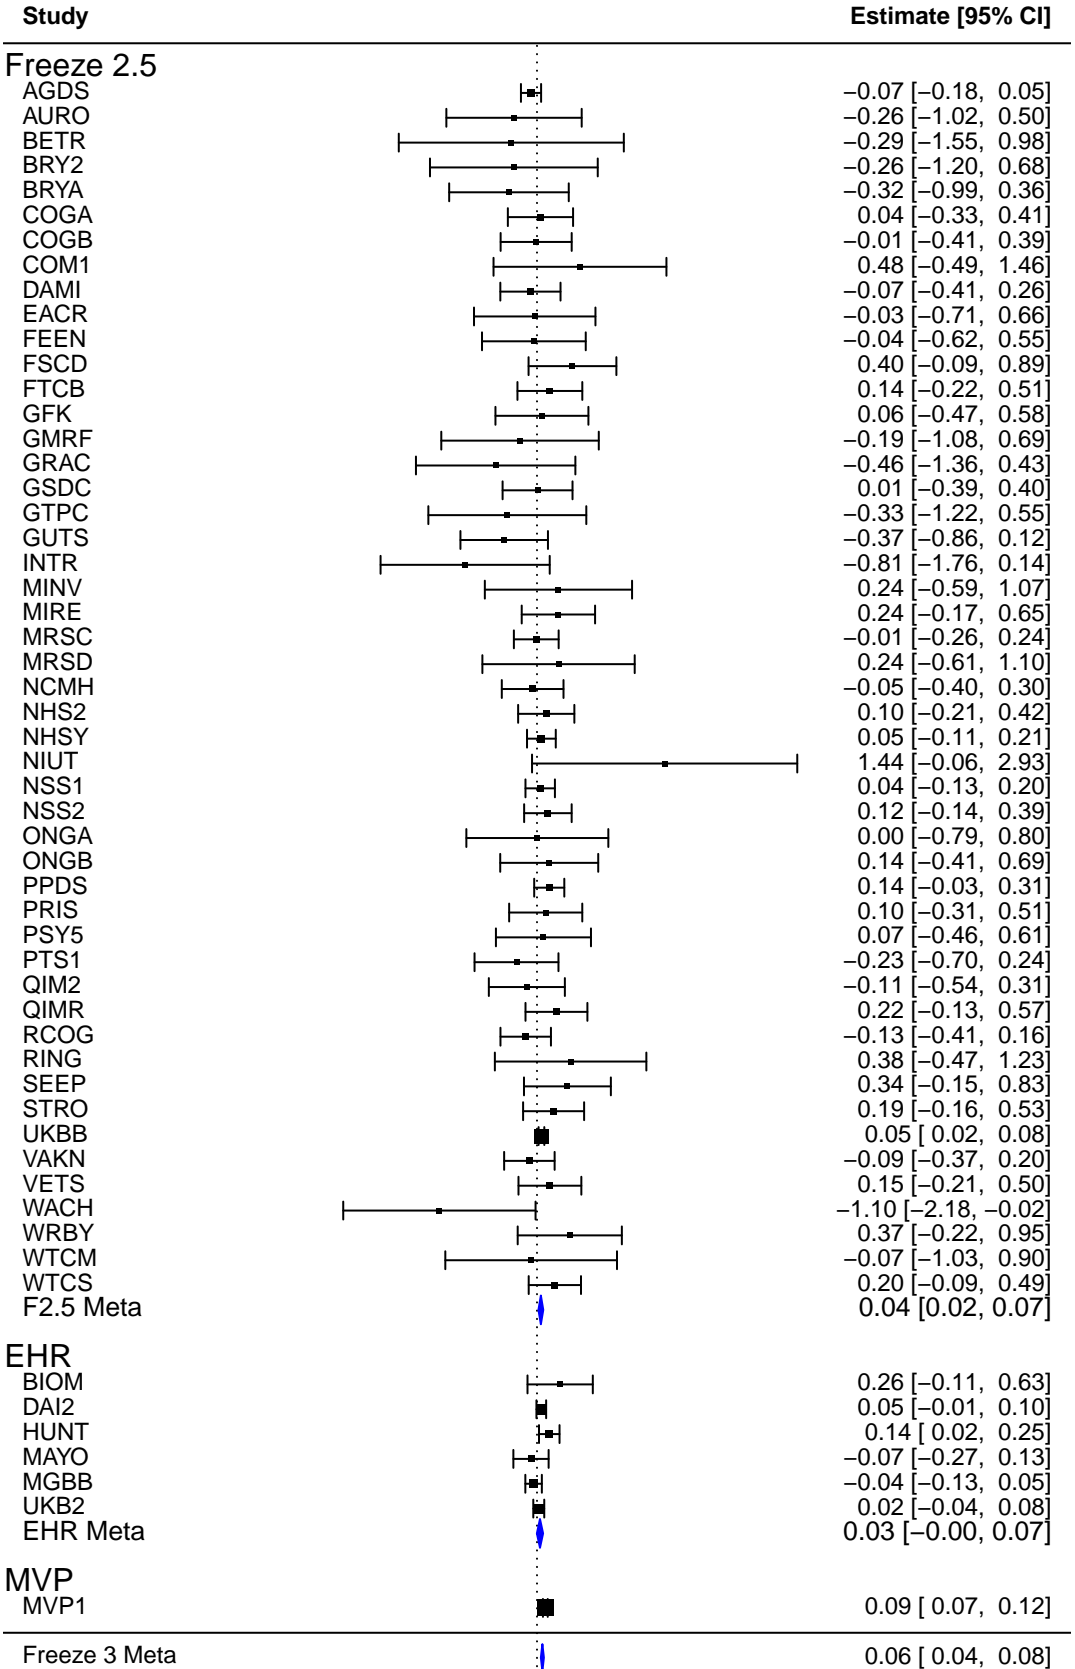

rs73338706 (Locus 71)

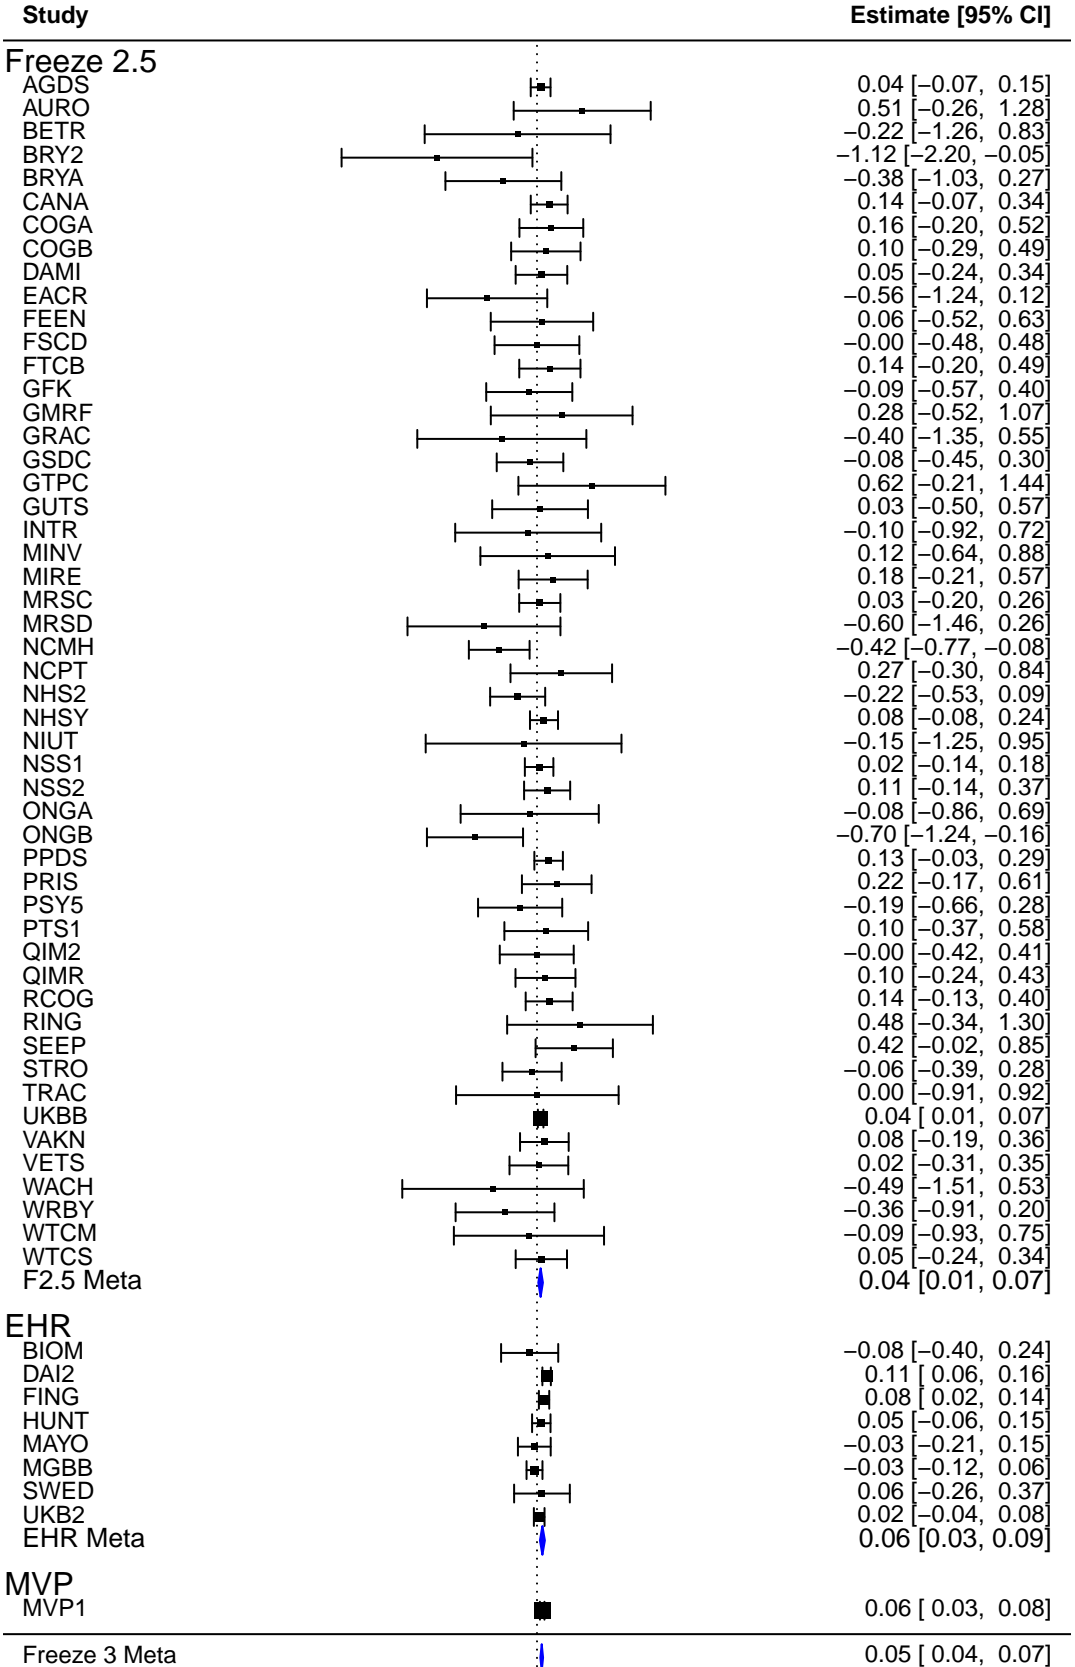



## rs7243332 (Locus 72)

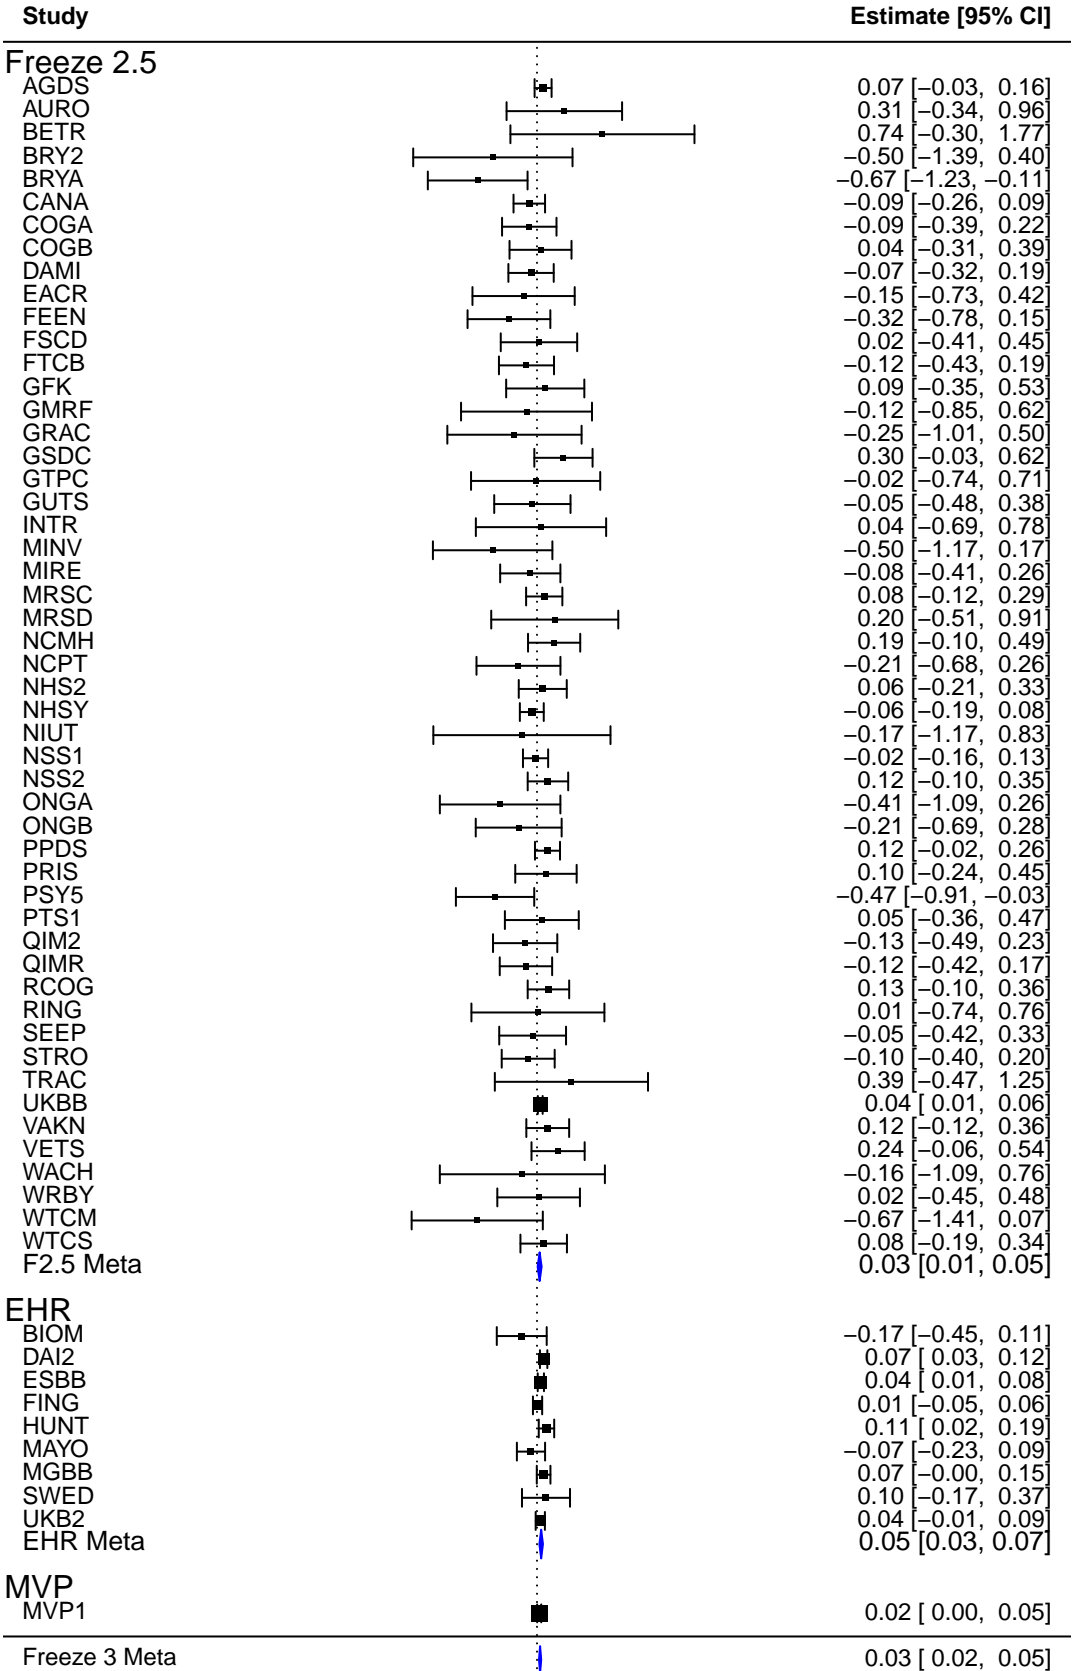

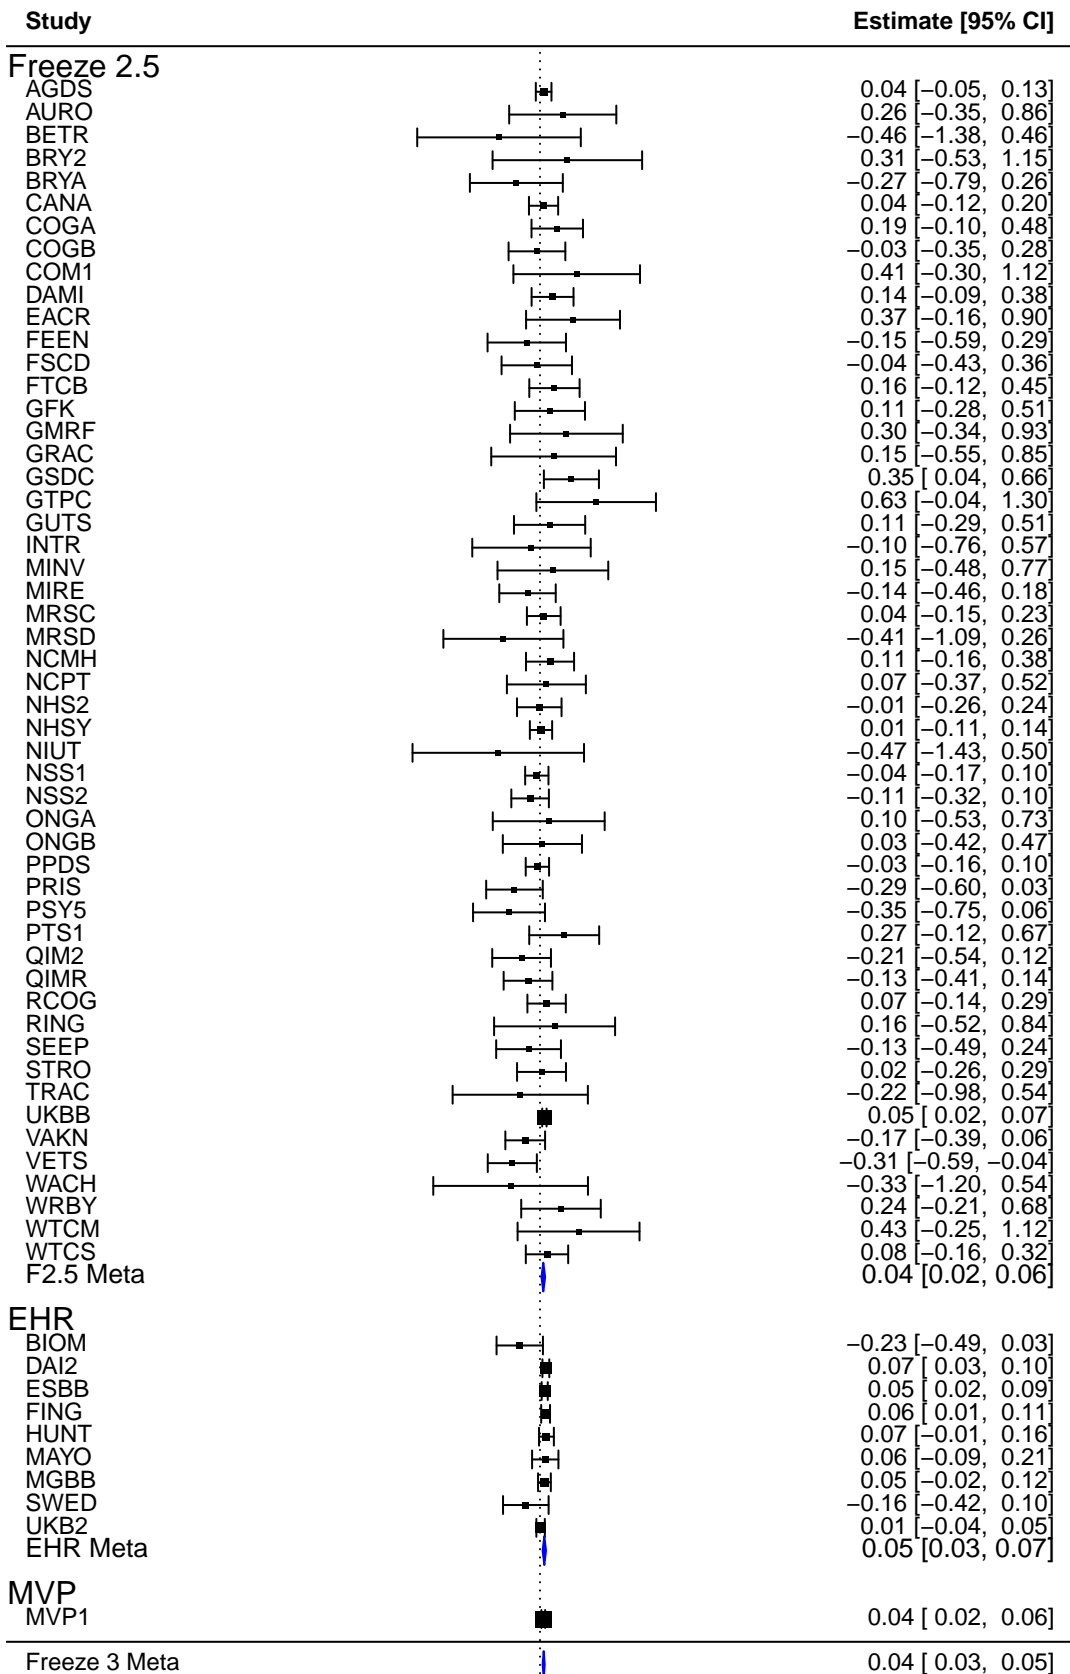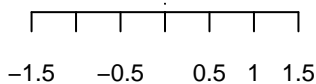

Observed Outcome

rs896686 (Locus 74)

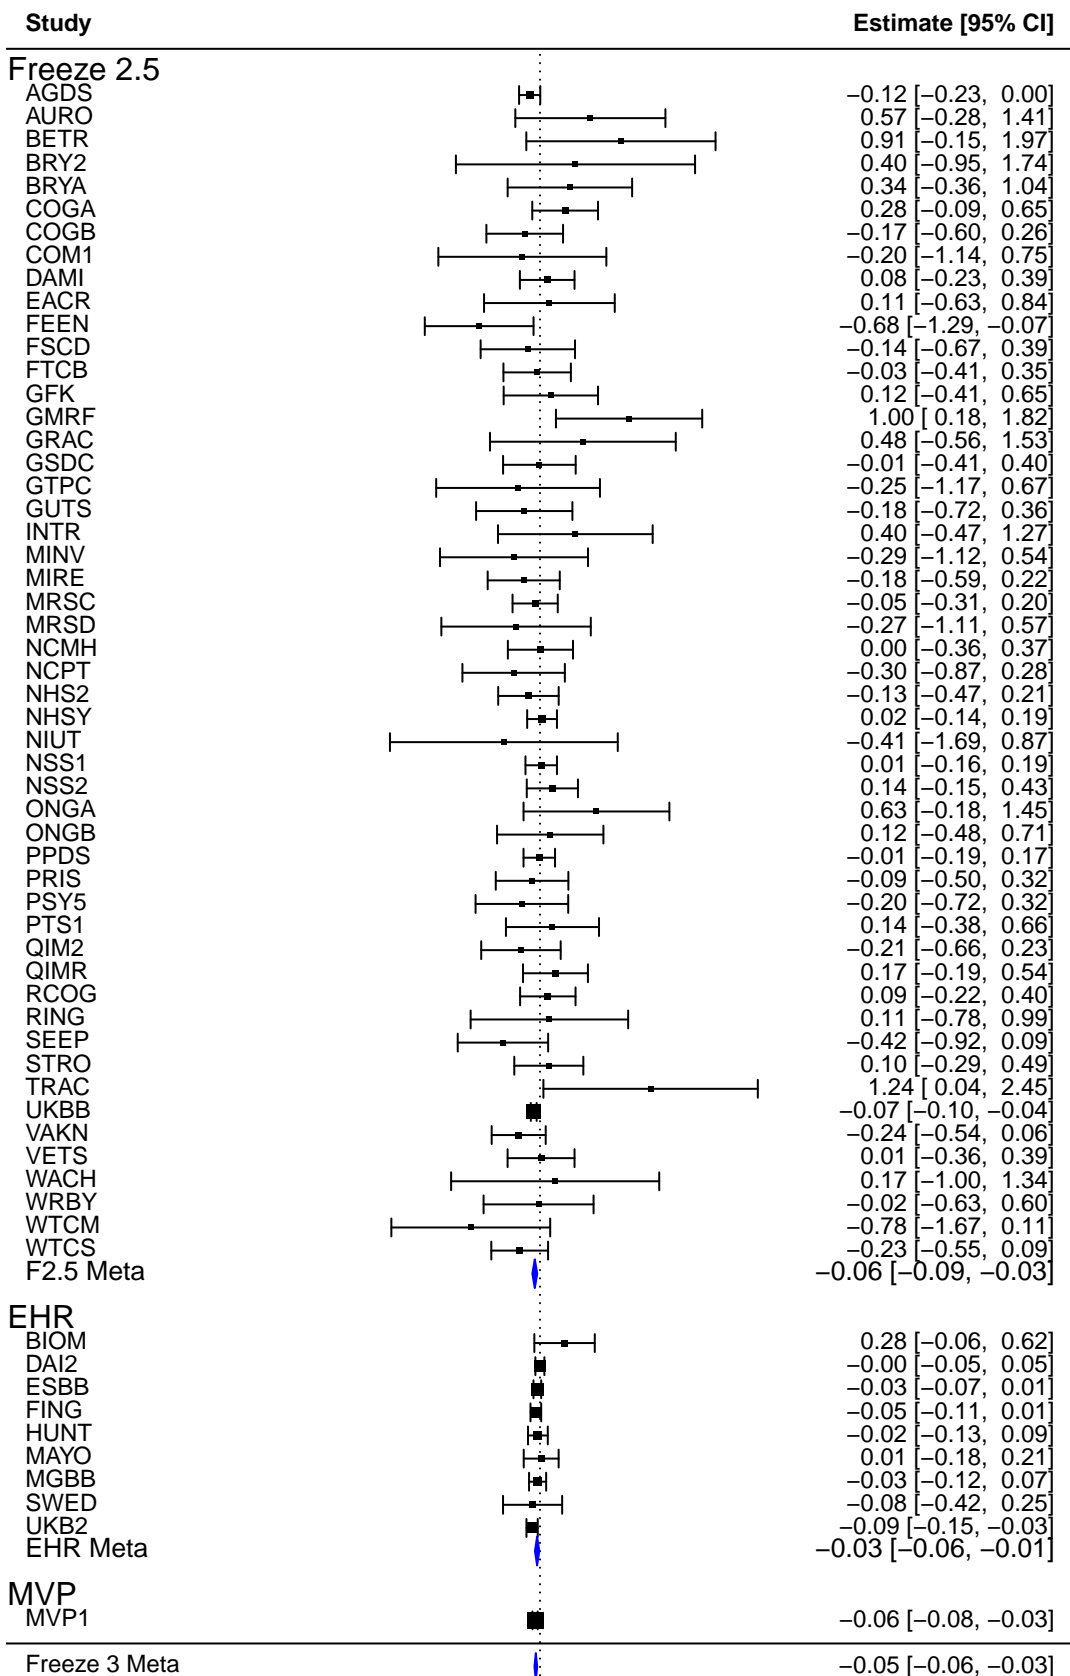

Observed Outcome

## rs7408312 (Locus 75)

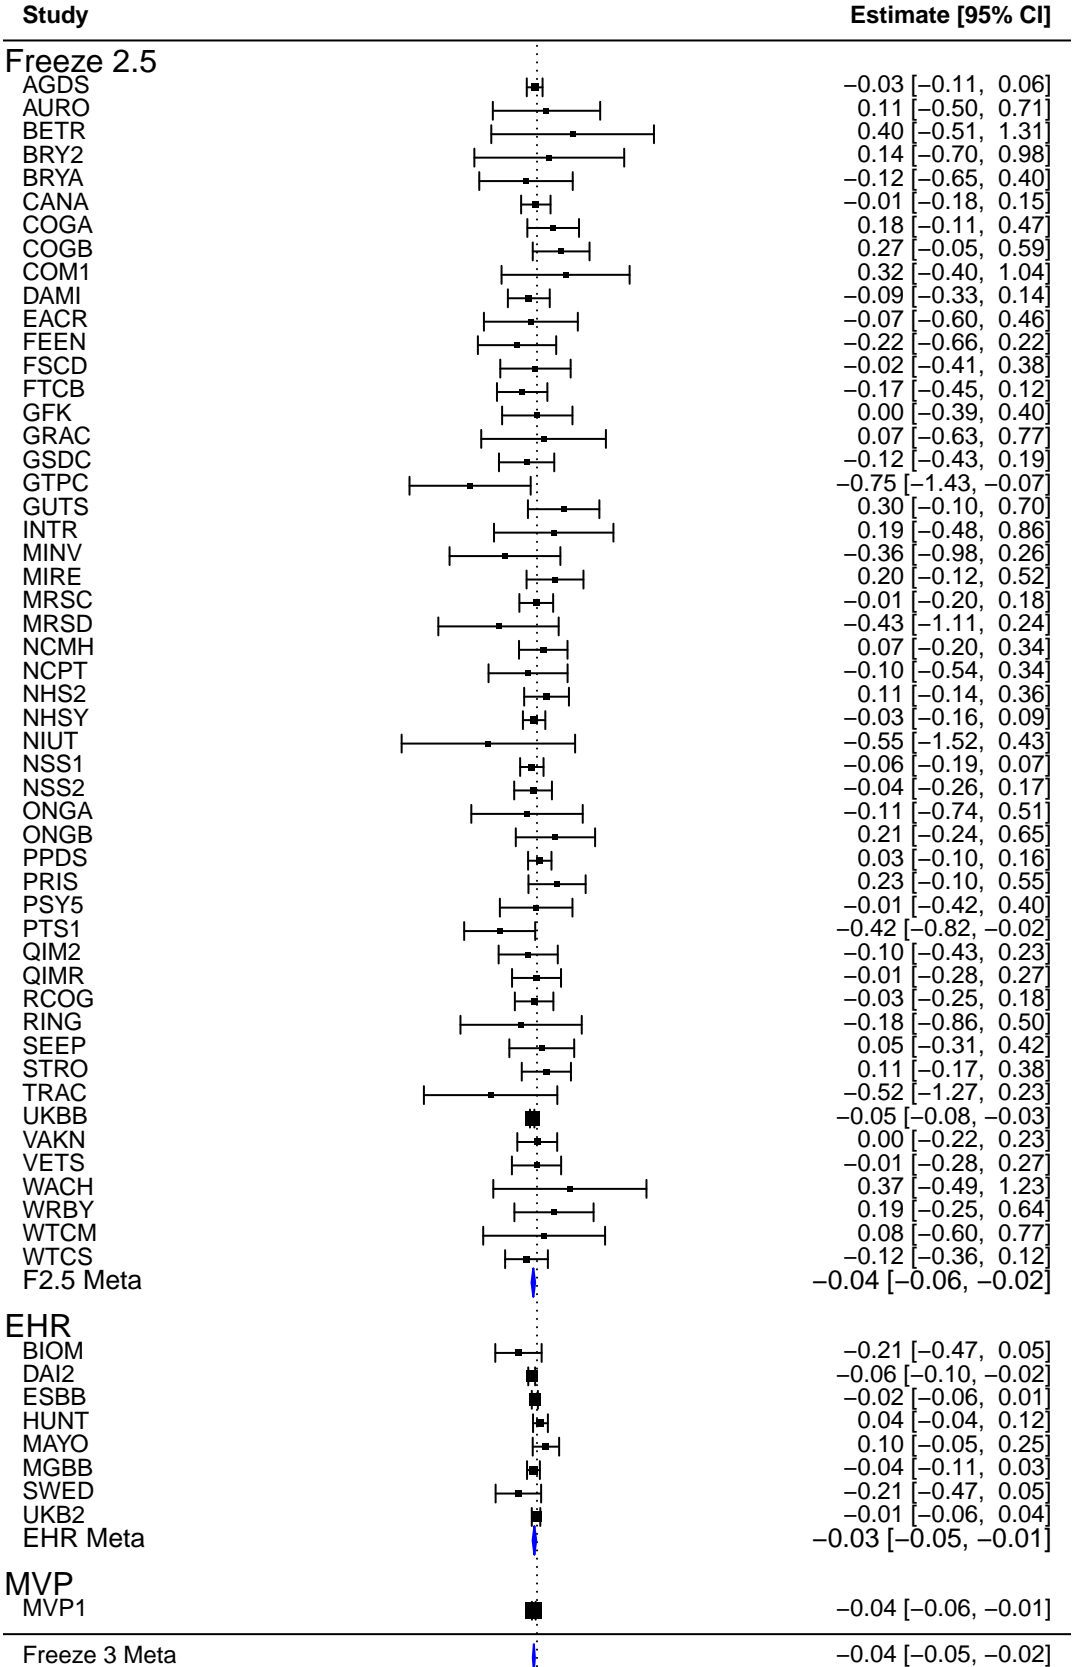

## rs6032660 (Locus 76)

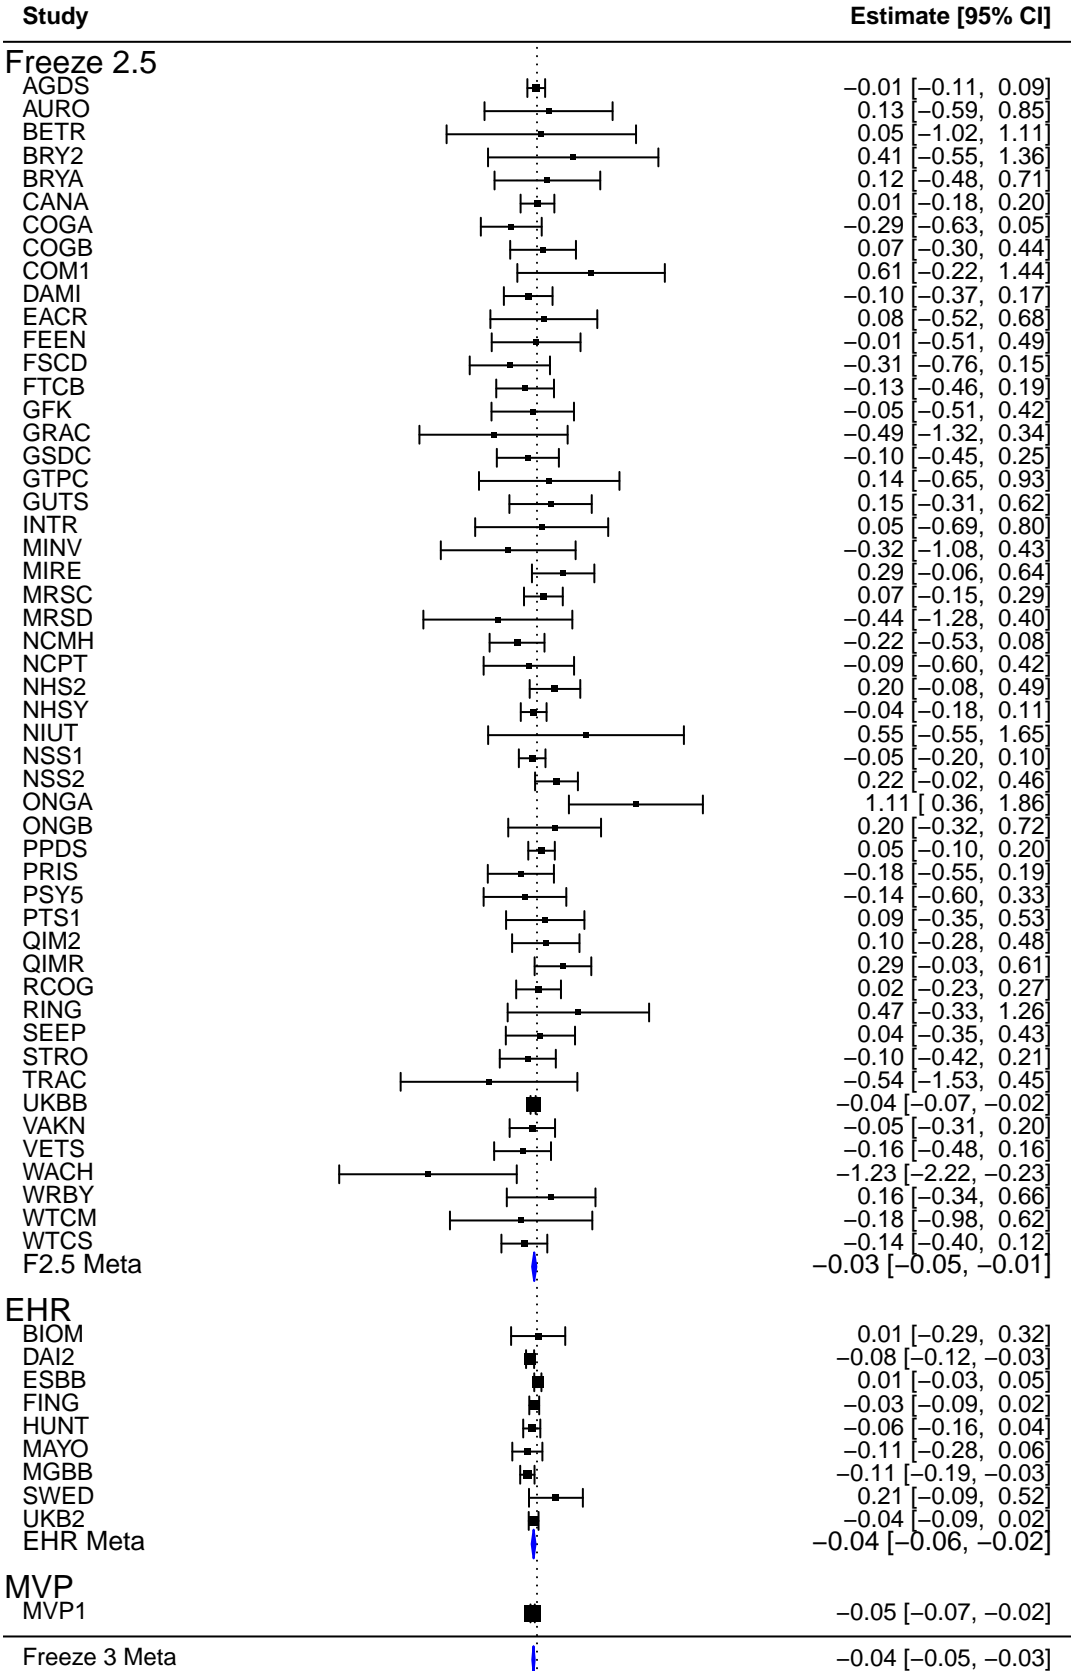

-3 -2 -1 0 1 2

Observed Outcome

## rs1378559 (Locus 77)

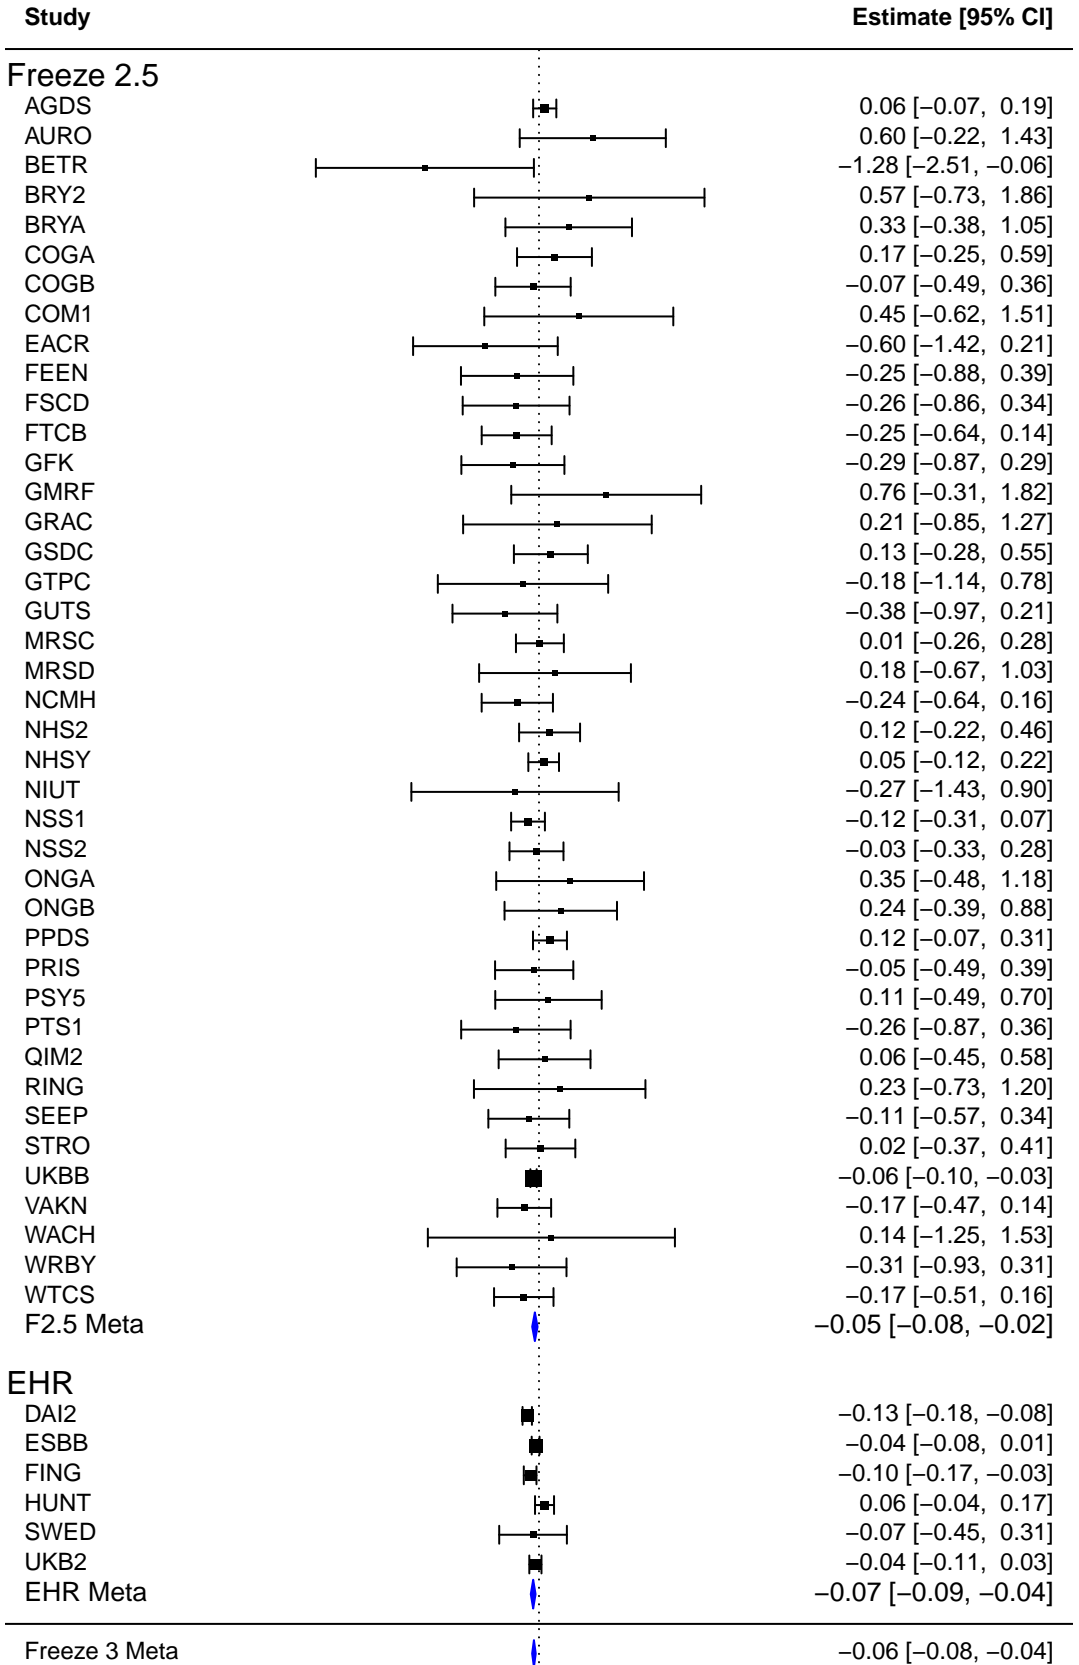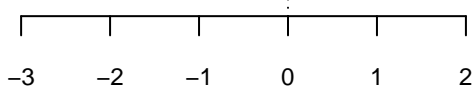

Observed Outcome

## rs10284205 (Locus 78)

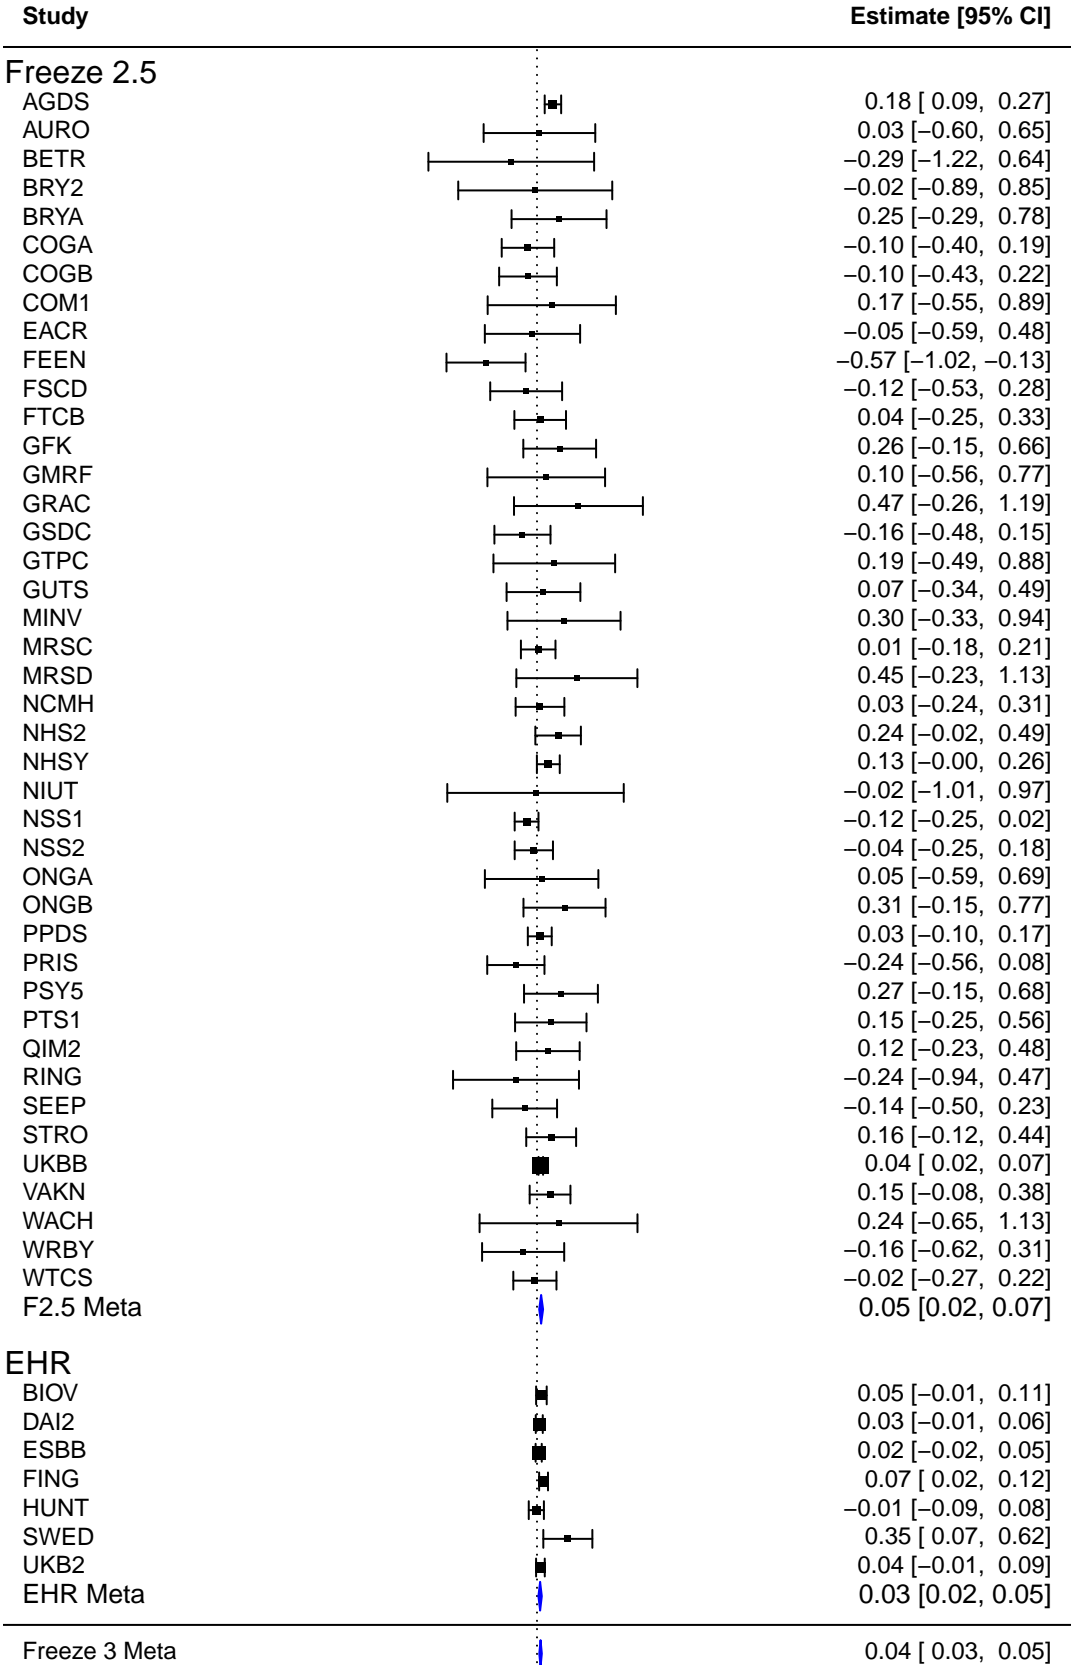

-1.5 -0.5 0.5 1 1.5

Observed Outcome

## rs1320317 (Locus 79)

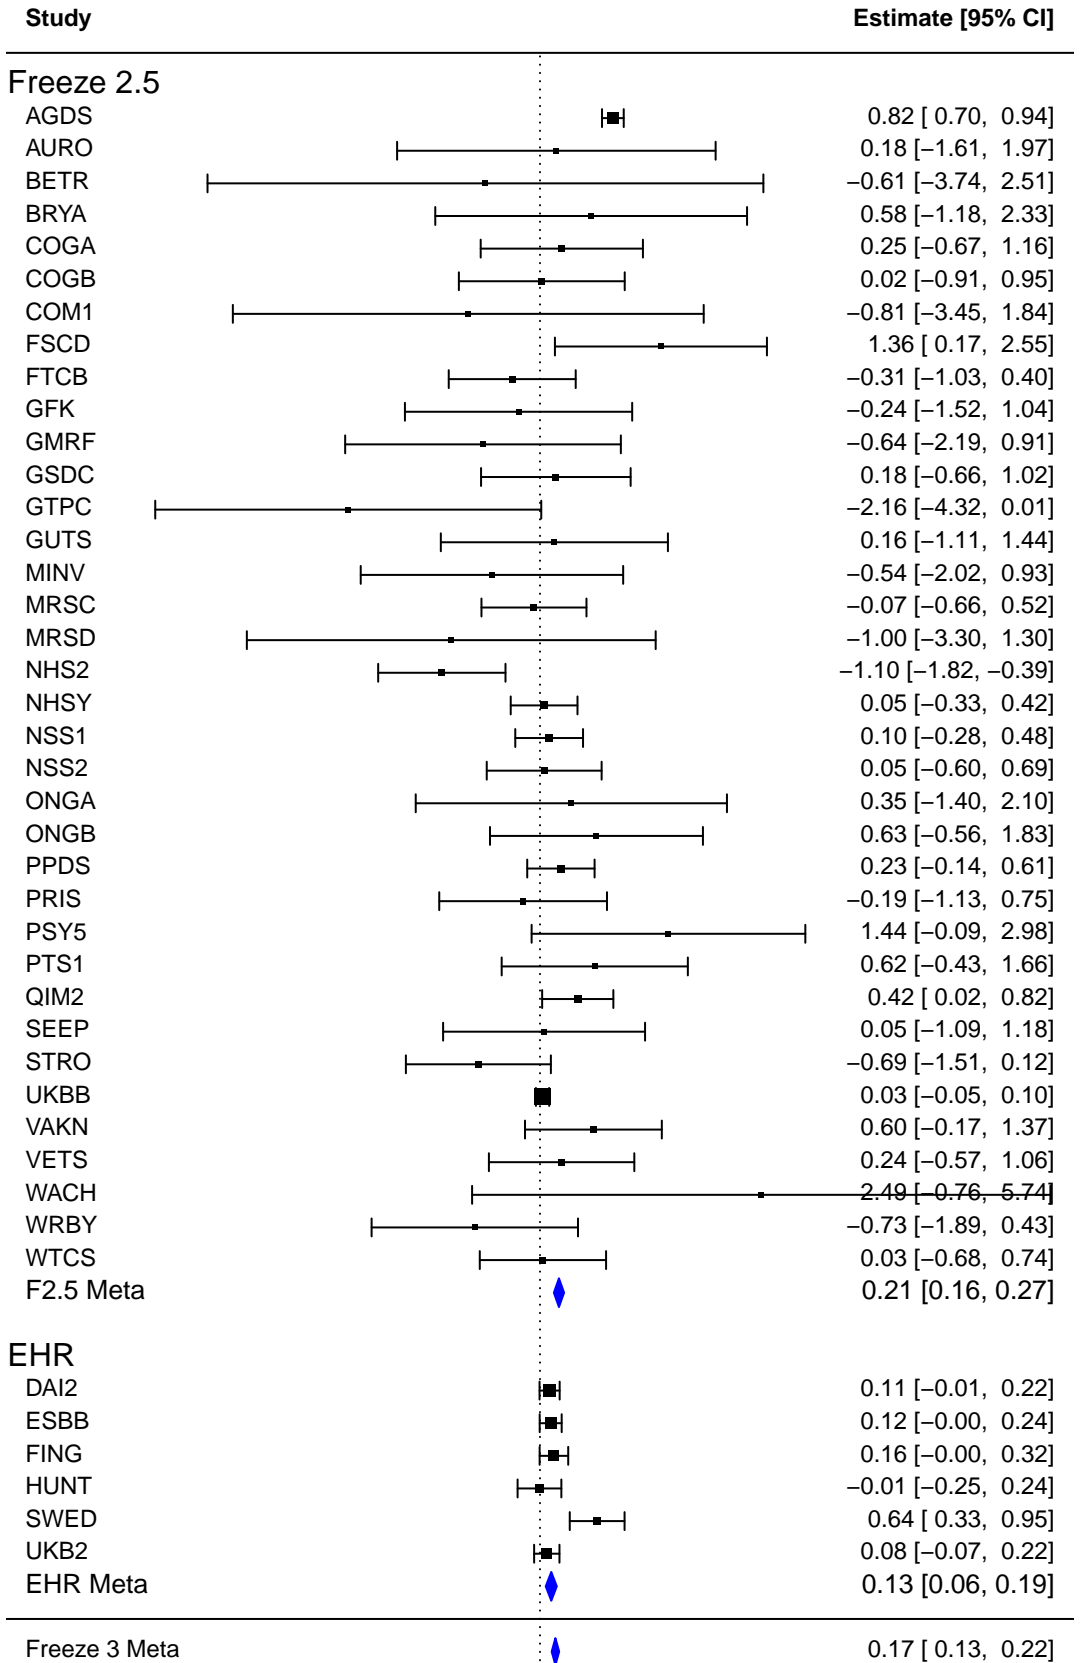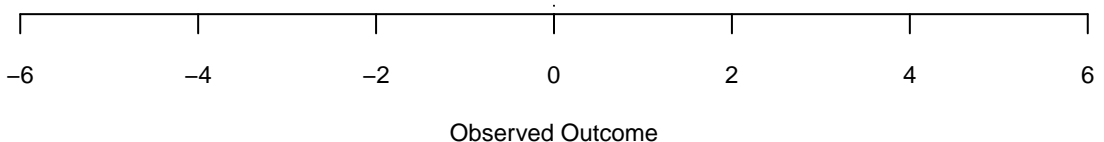



## rs112052534 (Locus 80)

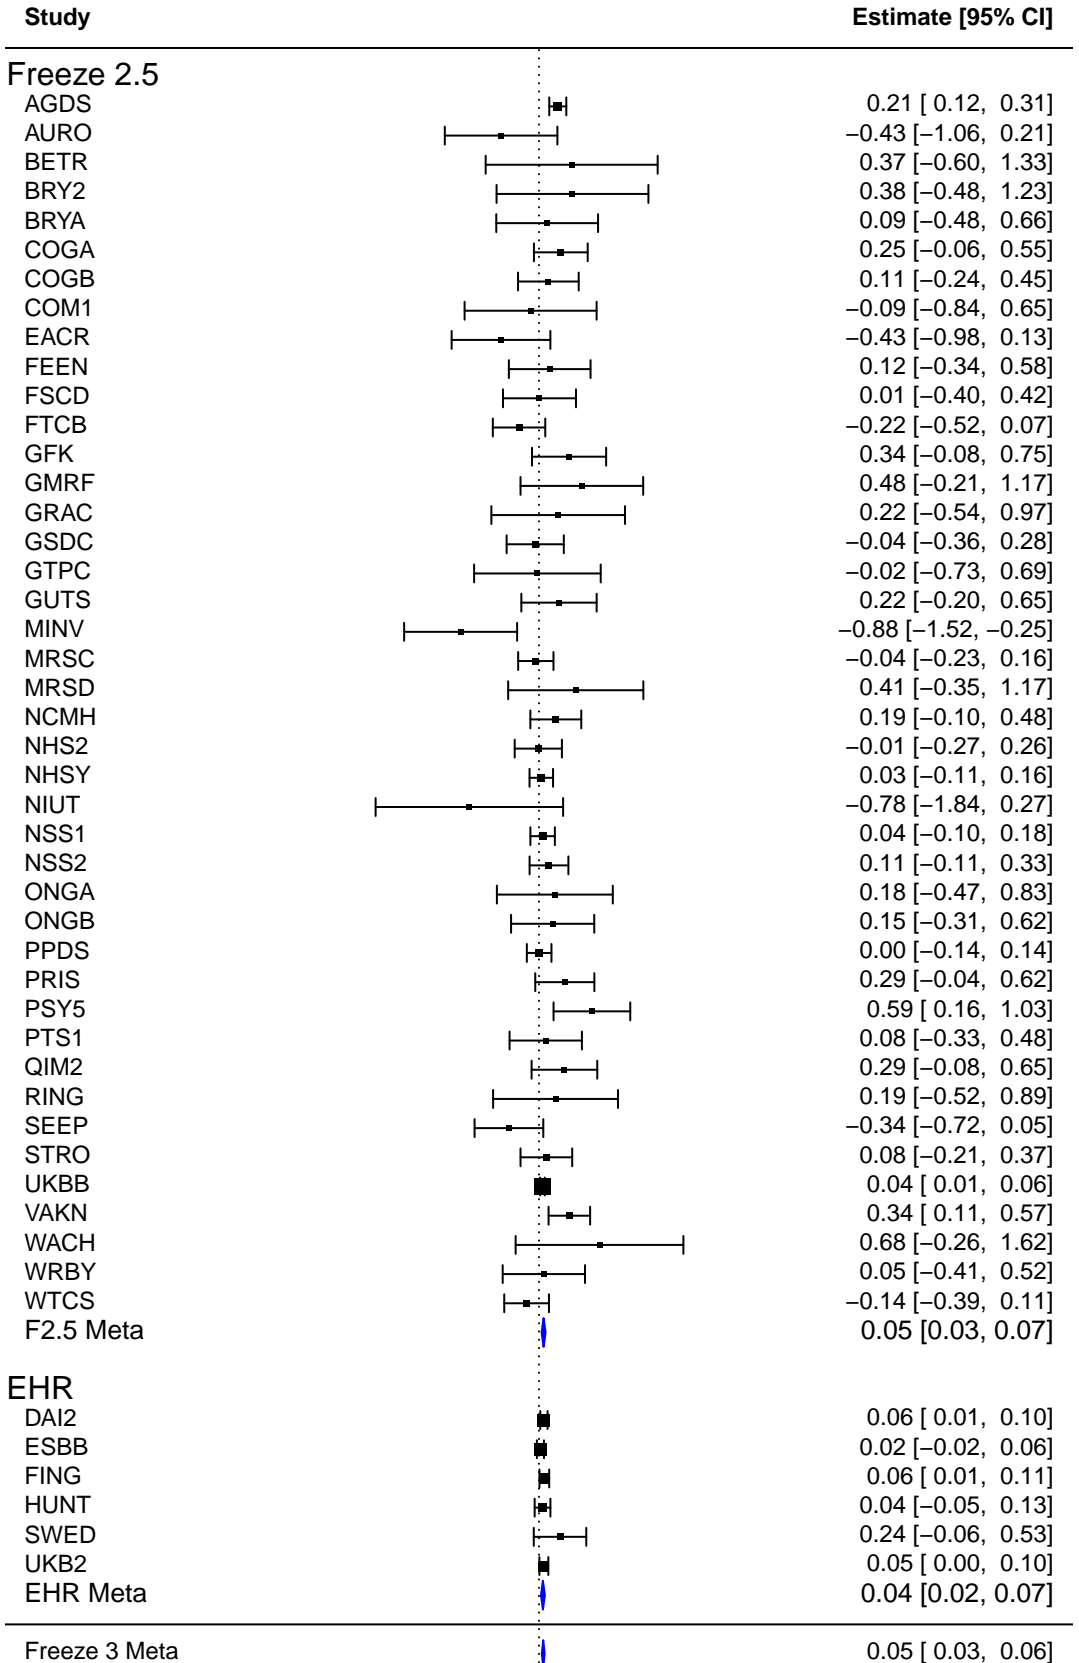

## rs2266850 (Locus 81)

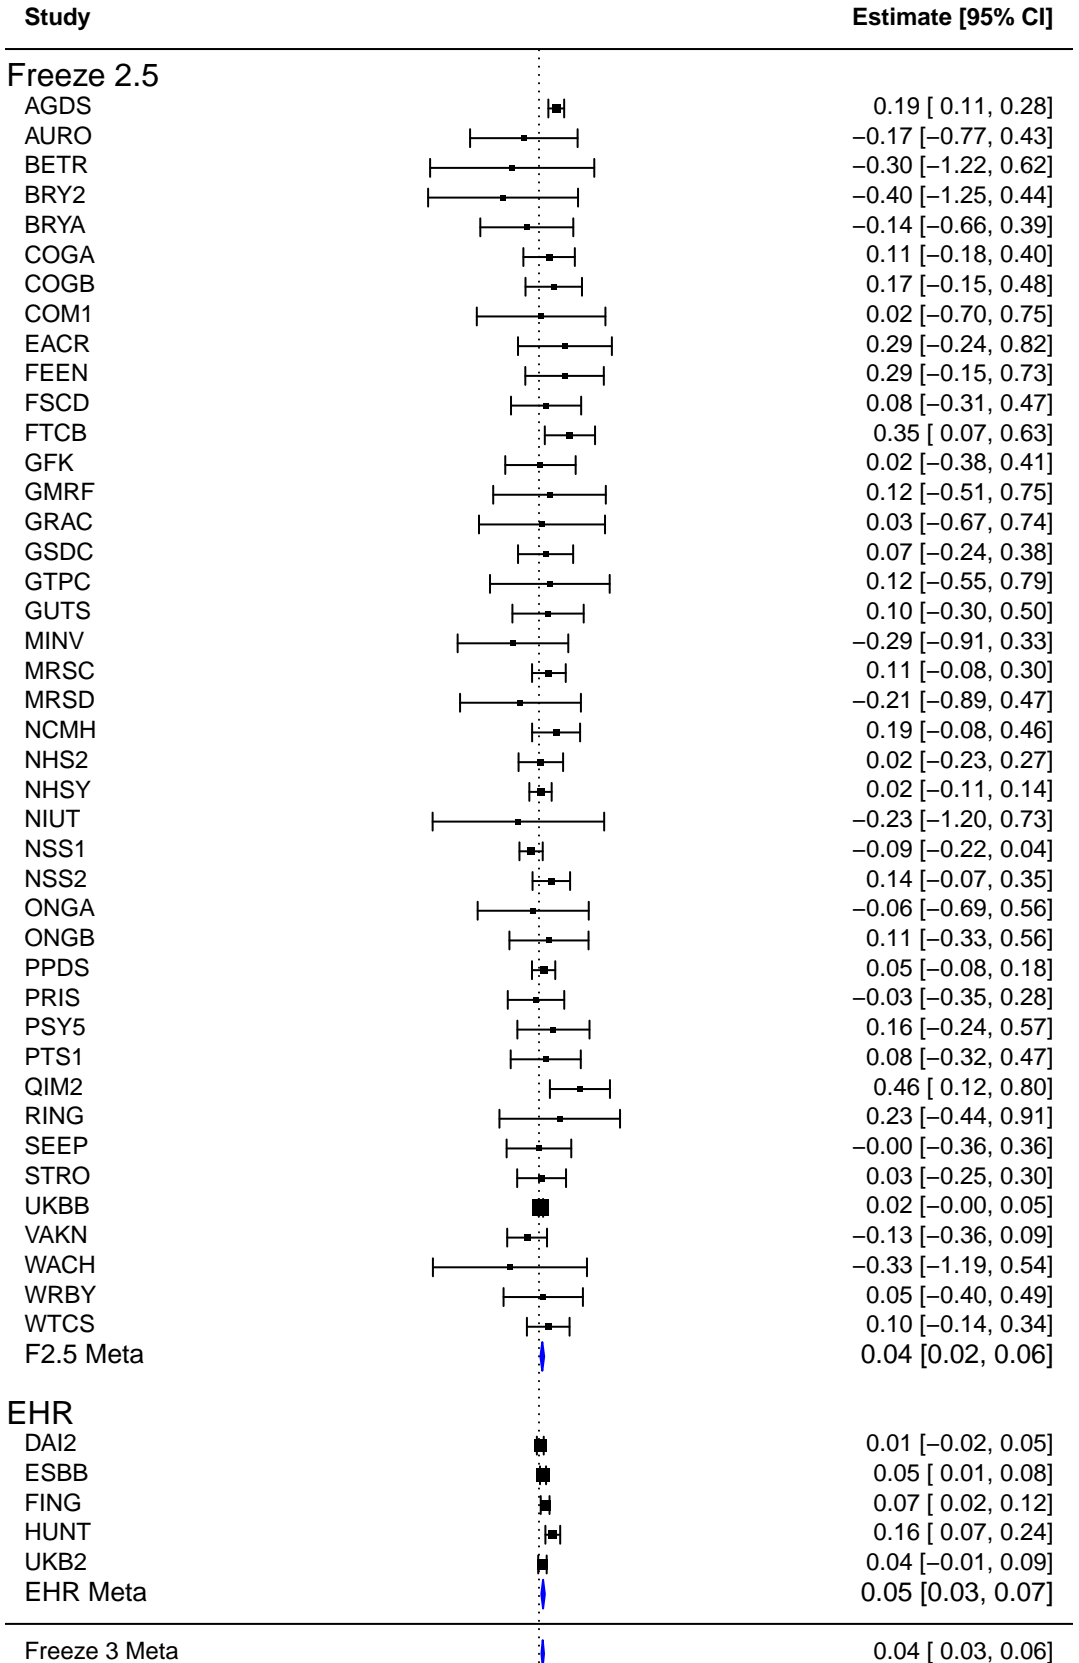

-1.5 -0.5 0.5 1

Observed Outcome
